# Supplementary material for: Identification of Differentially Expressed miRNAs between White and Black Hair Follicles by RNA-Sequencing in the Goat (Capra hircus)
Source: Int J Mol Sci. 2014 May 28;15(6):9531–45. doi: 10.3390/ijms15069531 (PMC4100108; doi:10.3390/ijms15069531)
Supplement: Supplementary File 1 — Supplementary Information (XLSX, 203 KB) [file ijms-15-09531-s001.xlsx]

## Sheet: Table S1
Supplementary information
Table S1. Identified miRNAs from white and black hair follicles in the goat by Solexa sequencing.
Rank	miRNA Name	Normalized Expression			Mature Sequence	Precursor Sequence	Genome Location	Strand
		WF(white follicle)	BF(black follicle)	Sum of 2 tissue
1	Goat-miR-146b-5p	186998	158761	345759	ugagaacugaauuccauaggcugu	ugagaacugaauuccauaggcugugagcucuagcaaaugcccuagggacucaguucuggu	chr26	+
2	Goat-miR-27b-3p	79872.8	72800.5	152673	uucacaguggcuaaguucugc	agagcuuagcugauuggugaacagugacugguuuccgcuuuguucacaguggcuaaguucugc	chr8	+
3	Goat-miR-205-5p	20575.8	19912	40487.8	uccuucauuccaccggagucug	uccuucauuccaccggagucugucucguacccacccagauuucaguggagugaagcuca	chr16	-
4	Goat-miR-181a-2-5p	21177.2	16613.3	37790.4	aacauucaacgcugucggugagu	aacauucaacgcugucggugaguuuggaauuaaaaaucaaaaccaucgaccguugauuguacc	chr16	-
5	Goat-miR-181a-1-5p	21176.8	16613.1	37789.9	aacauucaacgcugucggugagu	aacauucaacgcugucggugaguuugggauuugaaaaaaccaccgaccguugacuguacc	chr11	+
6	Goat-miR-92a-3p	19003.4	17003.4	36006.8	uauugcacuugucccggccugu	agguugggaucaguugcaaugcuguguuucuguaugguauugcacuugucccggccugu	chr12	+
7	Goat-miR-182-5p	14218.8	13630.3	27849.1	uuuggcaaugguagaacucacacu	uuuggcaaugguagaacucacacuggugagguaaugggauccggugguucuagacuugccaacu	chr4	-
8	Goat-miR-26a-1-5p	14855.6	12171.4	27027	uucaaguaauccaggauaggcu	uucaaguaauccaggauaggcuguuuccauccgugaggccuauucuugauuacuuguuuc	chr5	+
9	Goat-miR-26a-2-5p	14837.6	12152.1	26989.8	uucaaguaauccaggauaggcu	uucaaguaauccaggauaggcugugcaggucccaaggggccuauucucgguuacuugcacg	chr22	+
10	Goat-let-7f-5p	10685.3	8870.12	19555.4	ugagguaguagauuguauaguu	ugagguaguagauuguauaguugugggguagugauuuuacccuguucaggagauaacuauacaaucuauugccuuccc	chr8	+
11	Goat-miR-22-5p-3p	6693.37	7411.66	14105	aagcugccaguugaagaacugu	aguucuucaguggcaagcuuuauguccugacccagcuaaagcugccaguugaagaacugu	chr19	-
12	Goat-let-7a-2-5p	6951.27	7061.42	14012.7	ugagguaguagguuguauaguu	ugagguaguagguuguauaguuuggggcucugcccugcuaugggauaacuauacaaucuacugucuuucc	chr5	-
13	Goat-let-7a-1-5p	6953.88	7058.36	14012.2	ugagguaguagguuguauaguu	ugagguaguagguuguauaguuuagaauuacaucaagggagauaacuguacagccuccuagcuuuccu	chr15	-
14	Goat-miR-200b	6405.58	7211.62	13617.2	uaauacugccugguaaugaugac	caucuuacugggcagcauuggauggugucuggucucuaauacugccugguaaugaugac	chr16	-
15	Goat-miR-21-5p	4968.87	7564.02	12532.9	uagcuuaucagacugauguugacu	uagcuuaucagacugauguugacuguugaaucucauggcaacagcagucgaugggcugu	chr19	+
16	Goat-miR-186-5p	5676.28	5445.05	11121.3	caaagaauucuccuuuugggcuu	caaagaauucuccuuuugggcuuucugauuuuauuuuaagcccaaaggugaauuuuuuggga	chr3	+
17	Goat-miR-23b-3p	5803.77	4985.62	10789.4	aucacauugccagggauuaccac	uggguuccuggcaugcugauuugugacuuaagauuaaaaucacauugccagggauuaccac	chr8	+
18	Goat-miR-6119-5p	4557.03	5941.96	10499	agagguaaaaaauugauuugacu	agagguaaaaaauugauuugacuaguucuuuaacacaucuagcaaaucauuuuuuacucucca	chrX	-
19	Goat-miR-103-3p	4440.3	4231.69	8671.99	agcagcauuguacagggcuauga	agcuucuuuacagugcugccuuguagcauucaggucaagcagcauuguacagggcuauga	chr13	-
20	Goat-miR-191-5p	4455.25	4128.26	8583.51	caacggaaucccaaaagcagcug	caacggaaucccaaaagcagcuguugucuccagagcauuccagcugcgcuuggauuucguuccc	chr22	+
21	Goat-miR-25-3p	4316.69	3888.94	8205.63	cauugcacuugucucggucuga	aggcggagacuugggcaauugcuggacgcugccccgggcauugcacuugucucggucuga	chr25	+
22	Goat-miR-378-3p	3725.87	3829.24	7555.11	acuggacuuggagucagaaggc	cuccugacuccagguccuguguguuaccucgaaauagcacuggacuuggagucagaaggc	chr7	+
23	Goat-miR-30e-5p	3512.14	3426.66	6938.8	uguaaacauccuugacuggaagcu	uguaaacauccuugacuggaagcuguaaggcguugcaaggagcuuucagucggauguuuacagc	chr3	-
24	Goat-miR-148a-3p	2738.07	3841.81	6579.88	ucagugcacuacagaacuuugu	aaaguucugagacacuccgacucugaauaugauagaagucagugcacuacagaacuuugu	chr4	+
25	Goat-miR-30d-5p	3128.84	3108.48	6237.33	uguaaacauccccgacuggaagcu	uguaaacauccccgacuggaagcuguuccacacagcuaagcuuucagucagauguuugcugc	chr14	+
26	Goat-miR-10b-5p	0	4827.23	4827.23	uacccuguagaaccgaauuugu	uacccuguagaaccgaauuugugugguauccucguagucacagauucgauucuaggggaau	chr2	-
27	Goat-miR-24-3p	2475.1	2228.15	4703.24	uggcucaguucagcaggaac	gugccuacugagcugaaacacaguugauuugugcacacuggcucaguucagcaggaac	chr7	+
28	Goat-miR-660-5p	2434.67	2209.55	4644.21	uacccauugcauaucggagcug	uacccauugcauaucggagcugugaaugcucaaagcaccuccuaugugcauggauuac	chrX	-
29	Goat-miR-98-5p	2212.19	2386.2	4598.39	ugagguaguaaguuguauuguu	ugagguaguaaguuguauuguugugggguagggauuuuaggccccaauuagaagauaacuauacaacuuacuacuuuccc	chrX	-
30	Goat-miR-19b-3-3p	1986.65	2587	4573.65	ugugcaaauccaugcaaaacug	guuuugcugguuugcauuucagcauguguauauauggcugugcaaauccaugcaaaacug	chrX	+
31	Goat-miR-19b-1-3p	1982.69	2583.39	4566.08	ugugcaaauccaugcaaaacug	aguuuugcagguuugcauccagcugugugauauucugcugugcaaauccaugcaaaacug	chr12	+
32	Goat-miR-183-5p	1974.77	2285.48	4260.25	uauggcacugguagaauucacug	uauggcacugguagaauucacugugaacagucucggucagugaauuaccgaagggccauaaa	chr4	-
33	Goat-miR-99b-5p	1726.44	2279.93	4006.37	cacccguagaaccgaccuugcg	cacccguagaaccgaccuugcggggccuucgccgcacacaagcucgugucuguggguccgu	chr18	+
34	Goat-let-7g-5p	1834.8	1896.02	3730.82	ugagguaguaguuuguacaguu	ugagguaguaguuuguacaguuugagggucuaugauaccacccgguacaggagauaacuguacaggccacugccuugcc	chr22	+
35	Goat-miR-16b-1-5p	1853.11	1874.78	3727.89	uagcagcacguaaauauuggag	uagcagcacguaaauauuggaguuaagauucuaaaauuaucuccaguauuaacugugcugcugaa	chr12	-
36	Goat-miR-26b-5p	1803.49	1874.02	3677.5	uucaaguaauucaggauagguu	uucaaguaauucaggauagguugugugcuguccagccuguucuccauuacuuggcuc	chr2	+
37	Goat-miR-31-5p	1619.05	1905.88	3524.93	aggcaagaugcuggcauagcug	aggcaagaugcuggcauagcuguugaacugugaaccugcuaugccaacauauugccauc	chr8	+
38	Goat-miR-101-3p	1439.55	1491.36	2930.9	guacaguacugugauaacuga	ucaguuaucacagugcugaugcuguccauucuaaagguacaguacugugauaacuga	chr3	+
39	Goat-miR-93-5p	1470.04	1411.05	2881.08	caaagugcuguucgugcagguag	caaagugcuguucgugcagguagugugaucaccugaccuacugcugagccagcacuucccga	chr25	+
40	Goat-let-7i-5p	1200.11	1174.91	2375.02	ugagguaguaguuugugcuguu	ugagguaguaguuugugcuguuggucggguugugacauugcccgcuguggagauaacugcgcaagcuacugccuugcu	chr5	-
41	Goat-miR-151-5p	1167	1154.16	2321.16	ucgaggagcucacagucuagu	ucgaggagcucacagucuaguacgucucauccccuacuagacugaagcuccuugagga	chr14	+
42	Goat-miR-200a-3p	1081.36	1158.32	2239.68	uaacacugucugguaacgauguu	caucuuaccggacagugcuggauuucucagcucaacucuaacacugucugguaacgauguu	chr16	-
43	Goat-miR-10a-5p	729.974	1464.01	2193.98	uacccuguagauccgaauuugu	uacccuguagauccgaauuuguguaaggaauuuugugaucacaaauucguaucuaggggaau	chr19	+
44	Goat-miR-143-3p	379.26	1567.43	1946.69	ugagaugaagcacuguagcuc	ggugcagugcugcaucucuggucaguugggagucugagaugaagcacuguagcuc	chr7	+
45	Goat-miR-181b-5p	1054.16	880.196	1934.35	aacauucauugcugucggugggu	aacauucauugcugucgguggguuugacuuugaaucaacucacugaucaaugaaugca	chr11	+
46	Goat-miR-138-1-5p	634.841	1170.75	1805.59	agcugguguugugaaucaggccg	agcugguguugugaaucaggccgucgccaaucagagaacggcuacuucacaacaccagggu	chr22	+
47	Goat-miR-532-5p	854.849	863.259	1718.11	caugccuugaguguaggaccgu	caugccuugaguguaggaccguuggcaucuuaauuacccucccacacccaaggcuugca	chrX	-
48	Goat-miR-138-2-5p	592.917	1088.15	1681.07	agcugguguugugaaucaggccg	agcugguguugugaaucaggccgacgagcagcgcauccucuuacccggcuauuucacgacaccaggguu	chr18	+
49	Goat-miR-30a-5p	371.937	1293.47	1665.4	uguaaacauccucgacuggaagcu	uguaaacauccucgacuggaagcugugaggcugcagaaaggcuuucagucggauguuugcagcu	chr14	+
50	Goat-miR-429	878.988	756.159	1635.15	uaauacugucugguaaugccg	ucuuaccagacacgguuagaucugguccuucugucuaauacugucugguaaugccg	chr16	-
51	Goat-miR-141-3p	859.333	756.992	1616.33	uaacacugucugguaaagaug	caucuuccagcacaguguuggauggucuaauggugaagcuccuaacacugucugguaaagaug	chr5	-
52	Goat-miR-340-5p	699.932	774.622	1474.55	uuauaaagcaaugagacugauu	uuauaaagcaaugagacugauugucaugugucguuugugggauccgucucaguuacuuuauagcc	chr7	+
53	Goat-miR-2284x-5p	677.214	655.861	1333.07	gaaaaguucguucggguuuuuc	gaaaaguucguucggguuuuucguaacaucguacagaaaaacacgaacaaacuuuucggc	chr10	-
54	Goat-miR-193b-3p	636.933	624.904	1261.84	aacuggcccacaaagucccgcu	cgggguuuugagggcgagaugaguuuauguuuuauccaacuggcccacaaagucccgcu	chr25	+
55	Goat-miR-500-3p	577.971	635.315	1213.29	augcaccugggcaaggauucuga	uaauccuugcuaccugggugagagugcuuucugaaugcaaugcaccugggcaaggauucuga	chrX	-
56	Goat-miR-320a-3p	630.058	560.282	1190.34	aaaagcuggguugagagggcga	gccuucucuucccgguucuucccggagucgggaaaagcuggguugagagggcga	chr8	-
57	Goat-miR-16b-2-5p	582.679	599.152	1181.83	uagcagcacguaaauauuggggu	uagcagcacguaaauauugggguaguaaaauaaauauuaaacaccaauauuauugugcugcuuu	chr1	-
58	Goat-miR-130a-3p	544.043	529.672	1073.71	cagugcaauguuaaaagggc	gcucuuuucacauugugcuacugucugcgccugucacuagcagugcaauguuaaaagggc	chr15	+
59	Goat-miR-17-5p	466.322	509.265	975.588	caaagugcuuacagugcagguag	caaagugcuuacagugcagguagugauuugugcaucuacugcagugaaggcacuuguagc	chr12	+
60	Goat-miR-423-3p	539.036	427.916	966.952	agcucggucugaggccccucagu	ugaggggcagagagcgagacuuuucuauuuuccaaaagcucggucugaggccccucagu	chr19	+
61	Goat-miR-19a-3p	406.089	476.365	882.454	ugugcaaaucuaugcaaaacug	aguuuugcauaguugcacuacaagaagaauguaguugugcaaaucuaugcaaaacug	chr12	+
62	Goat-miR-769-5p	453.469	410.355	863.824	ugagaccuccggguucugagcu	ugagaccuccggguucugagcugugauguugcuuccgagcugggaucucuggggucucggu	chr18	+
63	Goat-miR-221-3p	431.049	425.973	857.022	agcuacauugucugcuggguuuc	accuggcauacaauguagauuucuguguuuguugagcaacagcuacauugucugcuggguuuc	chrX	+
64	Goat-miR-100-3p	303.483	485.111	788.594	aacccguagauccgaacuugug	aacccguagauccgaacuuguggugauagugcacacaagcuugugucuauagguaug	chr15	-
65	Goat-miR-708-3p	353.852	348.372	702.224	caucuagacugugagcuucuaga	aaggagcuuacaaucuagcuggggguaaacgacuugcacaugaacgcaucuagacugugagcuucuaga	chr29	+
66	Goat-miR-3431-5p	345.631	328.381	674.013	cucagucagccuuguggaugua	cucagucagccuuguggauguauguucugcagaccugacaucuagaggacugacugaaau	chrX	-
67	Goat-miR-130b-3p	322.091	335.323	657.414	cagugcaaugaugaaagggcauc	acucuuucccuguugcacuacugugcgccccuggcaagcagugcaaugaugaaagggcauc	chr17	-
68	Goat-miR-34a-5p	254.161	386.409	640.569	uggcagugucuuagcugguugu	uggcagugucuuagcugguuguugugaguaauaaugcaggaagcaaucagcaaguauacugcccu	chr16	+
69	Goat-miR-2284y-5p	322.166	314.291	636.457	gaaaaguucguucggguuuuuc	gaaaaguucguucggguuuuuccauaagcuguuauggaaagauguuuuuccauaacaucuuauggaaaaacccaaugaacuuuuugg	chr20	-
70	Goat-miR-20a-5p	278.971	352.051	631.022	uaaagugcuuauagugcagguag	uaaagugcuuauagugcagguaguguuuaguuaucuacugcauuaugagcacuuaaagu	chr12	+
71	Goat-miR-30b-5p	293.394	321.996	615.39	uguaaacauccuacacucagcu	uguaaacauccuacacucagcuguaacacuugagucggcugggagguggauguuuacuuc	chr14	+
72	Goat-miR-7857-1-5p	282.185	323.384	605.569	uagccaguuggggaagaaugcc	uagccaguuggggaagaaugcccgugucuuaaagugagaaggcuuguucuccaaccuggcucuuu	chr23	+
73	Goat-miR-1307-5p	540.68	0	540.68	ucgaccggaccucgaccggcu	ucgaccggaccucgaccggcucgucuauguugccaaucgacucggcguggcgucggucgugg	chr26	-
74	Goat-miR-106b-5p	259.168	267.161	526.329	uaaagugcugacagugcagau	uaaagugcugacagugcagauagugguccugugugcuaccgcacuguggguacuugcu	chr25	+
75	Goat-miR-211-5p	0	524.813	524.813	uucccuuugucauccuuugccc	uucccuuugucauccuuugcccaggguucugaguggggcagggacagcaaaggggug	chr21	-
76	Goat-miR-18a-5p	240.709	265.287	505.996	uaaggugcaucuagugcagau	uaaggugcaucuagugcagauagugaaguagauuagcaucuacugcccuaagugcuccuucugg	chr12	+
77	Goat-let-7e-5p	251.993	241.618	493.612	ugagguaggagguuguauaguu	ugagguaggagguuguauaguugaggaggacacccaaggagaucacuauacggccuccuagcuuucc	chr18	+
78	Goat-miR-374a-3p	219.186	256.056	475.242	cuuaucagguuguauuguaauu	uuauaauacaaccugauaaguguuacagcacuuaucagguuguauuguaauu	chrX	+
79	Goat-miR-421-3p	222.699	248.143	470.842	aucaacagacauuaauugggcgc	cucauuaaauguuuguugaaugaaaaaaugaaucaucaacagacauuaauugggcgc	chrX	+
80	Goat-miR-1271-5p	166.576	243.631	410.207	cuuggcaccuaguaaguacuc	cuuggcaccuaguaaguacucaguauauacuuguugagugccugcuaugugccagg	chr7	+
81	Goat-miR-181c-5p	191.237	214.132	405.369	aacauucaaccugucggugaguu	aacauucaaccugucggugaguuugggcagcucaggcaaaccaucgaccguugaguggacc	chr7	-
82	Goat-miR-224-5p	217.393	186.367	403.76	caagucacuagugguuccguuuag	caagucacuagugguuccguuuaguagaugguuguacauuguuucaaaaugguacccuagugacuacaa	chrX	-
83	novel-84-3p	195.347	203.442	398.79	uccccugcaucuccacca	ggcuacagucugugggguugcagaguuggacacaacugagcacauccccugcaucuccacca	chr8	-
84	Goat-miR-200c	209.247	188.311	397.558	uaauacugccggguaaugaugga	cgucuuacccagcaguguuugggugcugguugggagucucuaauacugccggguaaugaugga	chr5	-
85	Goat-miR-301b-3p	205.361	184.771	390.132	cagugcaaugauauugucaaagc	ucugacgagguugcacuacugugcuuugaggagcagugcaaugauauugucaaagc	chr17	-
86	Goat-miR-15a-5p	196.842	186.506	383.348	uagcagcacauaaugguuugu	uagcagcacauaaugguuuguggauuuugaaaaggugcaggccauauugugcugccuca	chr12	-
87	Goat-miR-15b-5p	182.568	179.704	362.272	uagcagcacaucaugguuuaca	uagcagcacaucaugguuuacauacuacagucaagaugcgaaucauuauuugcugcucu	chr1	-
88	Goat-miR-365-1-3p	178.159	181.37	359.529	uaaugccccuaaaaauccuuau	agggacuuucaggggcagcuguguuuucugacucagucauaaugccccuaaaaauccuuau	chr19	-
89	Goat-miR-365-2-5p	178.084	181.231	359.315	uaaugccccuaaaaauccuuau	agggacuuuugggggcagauguguuugcauuccacuaucauaaugccccuaaaaauccuuau	chr25	+
90	Goat-miR-99a-5p	139.747	207.468	347.215	aacccguagauccgaucuugu	aacccguagauccgaucuuguggugaaguggaccgcacaagcucgcuucuaugggucugu	chr1	-
91	Goat-miR-140-3p	154.992	192.198	347.19	accacaggguagaaccacggac	cagugguuuuacccuaugguagguuacgucaugcuguucuaccacaggguagaaccacggac	chr18	+
92	Goat-let-7c-5p	158.654	188.242	346.896	ugagguaguagguuguaugguu	ugagguaguagguuguaugguuuagaguuacacccugggaguuaacuguacaaccuucuagcuuucc	chr1	-
93	Goat-miR-342-3p	149.163	180.468	329.631	ucucacacagaaaucgcacccauc	aggggugcuaucugugguugaggacacggcaaauggaacugucucacacagaaaucgcacccauc	chr21	+
94	Goat-miR-28-3p	154.32	166.169	320.489	cacuagauugagagcuccuggag	aaggagcucacagucuauugaguugccuuucugacuuucccacuagauugagagcuccuggag	chr1	-
95	Goat-miR-331-3p	153.049	156.799	309.848	gccccugggccuauccuagaa	cuagguauggucccagggaucccagaucaaaccaggccccugggccuauccuagaa	chr5	+
96	Goat-miR-6529-5p	149.014	159.436	308.45	gagagaucagaggcgcagagu	gagagaucagaggcgcagagugcgucaaugucaaugaagccugugccuuuuaccucuuuaa	chr1	-
97	Goat-miR-652-3p	149.014	145.832	294.846	aauggcgccacuaggguugugc	acaacccuaggagagggugccauucacauagacuagaauugaauggcgccacuaggguugugc	chrX	+
98	Goat-miR-361-5p	146.847	145.138	291.984	uuaucagaaucuccagggguac	uuaucagaaucuccagggguacuuauaauuugaaaaagucccccaggugugauucugauuugc	chrX	+
99	Goat-miR-184-3p	168.295	84.2645	252.559	uggacggagaacugauaagggu	ccuuaucacuuuuccagccagcuuugugacucuaacuguuggacggagaacugauaagggu	chr21	+
100	Goat-miR-296-3p	130.63	113.695	244.325	aggguugggcggaggcuuuccu	gagggccccccccaauccuguugugcuugguucagaggguugggcggaggcuuuccu	chr13	+
101	Goat-miR-125b-1-5p	100.513	125.772	226.285	ucccugagacccuaacuuguga	ucccugagacccuaacuugugagguauuuuaguaacaucacaagucaggcucuugggaccu	chr1	-
102	Goat-miR-125b-2-5p	100.289	125.703	225.992	ucccugagacccuaacuuguga	ucccugagacccuaacuugugauguuuaccguuuaaauccacggguuaggcucuugggagcu	chr15	-
103	Goat-miR-197-3p	126.296	95.4396	221.735	uucaccaccuucuccacccagc	cggguagagagggcagugggagguaagagcucuucacccuucaccaccuucuccacccagc	chr3	-
104	Goat-miR-194-1-5p	116.805	97.4525	214.257	uguaacagcaacuccaugugga	uguaacagcaacuccauguggaaguaccacuaguuccaguggggcugcuguuaucug	chr29	-
105	Goat-miR-222-3p	115.609	95.509	211.118	agcuacaucuggcuacugggucuc	cucaguagccaguguagauccugucuuuuguaaucaguagcuacaucuggcuacugggucuc	chrX	+
106	Goat-miR-29a-3p	73.6102	115.083	188.693	uagcaccaucugaaaucgguua	acugauuucuuuugguguucagagucaauauaauuuucuagcaccaucugaaaucgguua	chr4	-
107	novel-9-3p	94.4602	84.195	178.655	aaaaccugaaugaacuuuugag	aaaauguucaugcagguuuuuccguaagauguuacaggaaaaccugaaugaacuuuugag	chrX	+
108	Goat-miR-194-2-5p	98.944	79.5445	178.489	uguaacagcaacuccaugugga	uguaacagcaacuccauguggacugugcgucaauuuccaguggagaugcuguuacuuu	chr16	-
109	Goat-miR-7857-2-3p	79.5139	95.9254	175.439	auuguucuccaaccuggcucuuu	uagccaguuggggaagaaugcuguuaccauggagagaagcuggauuguucuccaaccuggcucuuu	chr23	-
110	Goat-miR-133a-1-3p	15.6935	148.4	164.093	uuugguccccuucaaccagcugu	agcugguaaaauggaaccaaaucgccucuucaauggauuugguccccuucaaccagcugu	chr24	+
111	Goat-miR-133a-3-3p	15.6935	148.4	164.093	uuugguccccuucaaccagcugu	agcugguaaaauggaaccaaaucaacuguucgauggauuugguccccuucaaccagcugu	chr13	-
112	Goat-miR-128-3p	84.8946	77.254	162.149	ucacagugaaccggucucuuu	cggggccguagcacugucugagagguuuacauuucucacagugaaccggucucuuu	chr2	-
113	Goat-miR-146a-5p	0	153.675	153.675	ugagaacugaauuccauagguu	ugagaacugaauuccauagguugugucagugucagaccugugaaguuuaguucuuuag	chr7	+
114	Goat-miR-1468-3p	53.8064	66.4259	120.232	cuccguuugccuguuuugcuga	cuccguuugccuguuuugcugauguucauuugacuuauucucagcaaaauaagcaaauggaaaa	chrX	+
115	Goat-miR-502b-3p	56.4967	61.5672	118.064	auccaccugggcaaggauucugaa	uaauucuugcuccccaggugagagugcuuugugaaugcaauccaccugggcaaggauucugaa	chrX	-
116	Goat-miR-374b-5p	54.7779	58.5131	113.291	auauaauacaaccugcuaagugu	auauaauacaaccugcuaaguguccuagcacuuaucagguuguauuaucauu	chrX	+
117	novel-21-3p	58.8881	53.7238	112.612	aaagccugaaugaacuuuuugg	caauaaguucguuuggguuuuuggcuguuacagaaagccugaaugaacuuuuugg	chrX	+
118	novel-29-5p	105.147	0	105.147	aagguagauagaacaggucuug	aagguagauagaacaggucuugugugcaaaaugaauucaagaccuacuuaucuaccaacagc	chr21	+
119	Goat-miR-454-3p	48.9489	48.7262	97.6751	uagugcaauauugcuuauagggu	acccuaucgauauugucucugcuguguaaauagcucugaguagugcaauauugcuuauagggu	chr19	-
120	Goat-miR-499-5p	42.522	50.1839	92.7059	uuaagacuugcagugauguuu	uuaagacuugcagugauguuuaacuccucuccacgugaacaucacagcaagucugugcu	chr13	+
121	Goat-miR-96-5p	32.7322	52.8909	85.6231	uuuggcacuagcacauuuuugcu	uuuggcacuagcacauuuuugcuugugucucuccgcucugagcaaucaugugcagugccaaua	chr4	-
122	Goat-miR-127-3p	21.672	61.7754	83.4475	ucggauccgucugagcuuggcu	cugaagcucagagggcucugauucagaaagaucaucggauccgucugagcuuggcu	chr21	+
123	novel-76-5p	42.6715	40.6052	83.2767	uauugcacauuacuaaguugc	uauugcacauuacuaaguugcauguugucacggccucagugcaauuuagugugugugauauu	chr8	-
124	Goat-miR-2285k-1-3p	40.8779	37.8982	78.7761	aaaaccggaaugaacuuuuugg	aaaaaguucauucagguuuuucuguaaagguguaggcaaaaaccggaaugaacuuuuugg	chr13	-
125	Goat-miR-2285k-2-3p	40.8032	37.8982	78.7014	aaaaccggaaugaacuuuuugg	aaaaaguuaauugagauuuuuccauagcaucucauggaaaaaccggaaugaacuuuuugg	chr13	-
126	Goat-miR-2285k-3-3p	40.8032	37.8982	78.7014	aaaaccggaaugaacuuuuugg	agaaaguuuguucgaguuauggaaaaaccggaaugaacuuuuugg	chr16	-
127	Goat-miR-135b-5p	38.4118	39.4946	77.9064	uauggcuuuucauuccuauguga	uauggcuuuucauuccuaugugauuacuguuccaaacucauguagggcuaaaagccaugggu	chr16	-
128	Goat-miR-362-5p	36.6183	41.0911	77.7093	aauccuuggaaccuaggugugagu	aauccuuggaaccuaggugugagugcugcucuagugcaacacaccuauucaaggauuca	chrX	-
129	novel-10-3p	41.1769	34.6359	75.8127	aaaaccugaaugaacuuuuuga	gaaaguuuguuuggguuuuuccauuccauuuuaugguaaaaccugaaugaacuuuuuga	chr13	+
130	Goat-miR-196a-5p	34.9742	36.0241	70.9983	uagguaguuucauguuguuggg	uagguaguuucauguuguugggauugaguuuugaacucggcaacaagaaacugccugagu	chr5	-
131	novel-4-5p	41.5505	27.6254	69.1759	aaaaauuuguucggguuuuucu	aaaaauuuguucggguuuuucuguaagauaagaugguacagaaaaaccugagcaaacuuuuug	chr10	-
132	Goat-miR-330-5p	34.9742	32.4147	67.3889	ucucugggccugugucuuaggcu	ucucugggccugugucuuaggcucugcaagaucaaccgagcaaagcacacggccugcagaga	chr18	-
133	Goat-miR-1249-3p	27.9494	37.4123	65.3618	acgcccuucccccccuucuuca	aggagggaggagaugggccacguucccucugccuggaacgcccuucccccccuucuuca	chr5	+
134	novel-56-5p	39.6822	25.5431	65.2253	cuggacuuggggucagaaggcu	cuggacuuggggucagaaggcuggcccuggugccagcagugccugaguccuaagauccuucc	chr21	+
135	Goat-miR-664b-3p	32.2838	32.623	64.9068	uauucauuuaucucccagccuaca	caggcuaggagaaaugauuggauagaaaauuuuauucuauucauuuaucucccagccuaca	chr16	-
136	novel-43-5p	32.1344	32.4842	64.6185	caaaaaguucguuuggguuuuu	caaaaaguucguuuggguuuuuccauacgguuuuacagaaaacccaaacgaacuuguuggcc	chr6	-
137	novel-28-3p	23.5403	37.9676	61.5079	aagggacccgaacgaacuuuuugg	caaaaguucuuuuggguuuucccauaacaucuuguggaagggacccgaacgaacuuuuugg	chr5	+
138	novel-6-3p	31.3123	27.9031	59.2154	aaaacccgaaugaacuuuuugg	gaaagguucauuuggguuuuuuggaacaguuacaggaaaacccgaaugaacuuuuugg	chr12	-
139	novel-105-1-3p	31.7607	26.6537	58.4144	aacaccugaaugaacuuuuugg	aaaaagugcauucagauuuuacuggaagaugguacugaacaccugaaugaacuuuuugg	chr10	-
140	novel-67-5p	29.9672	27.209	57.1761	gucaaaaaauucguuuggguuu	gucaaaaaauucguuuggguuuugcccauaaggucuaugaaaaaacccaaacgaacuuuuuggcc	chr25	+
141	Goat-miR-199a-3p	16.0672	35.8159	51.8831	acaguagucugcacauugguu	cccaguguucagacuaccuguucaggacaaugccguuguacaguagucugcacauugguu	chr16	-
142	Goat-miR-199b-3p	16.0672	35.7465	51.8136	acaguagucugcacauugguu	cccaguguuuagacuaucuguucaggacucccaaauuguacaguagucugcacauugguu	chr11	-
143	Goat-miR-2285e-3p	26.1559	24.9184	51.0743	auaaaccugaacgaacuuuuug	aaaaguucguuuggauuucucuguaagaugcuguggauaaaccugaacgaacuuuuug	chr1	+
144	Goat-miR-424-5p	20.1027	30.0548	50.1575	cagcagcaauucauguuuuga	cagcagcaauucauguuuugaagugcuuuaaacgguucaaaacgugaggcgcugcu	chrX	+
145	novel-72-3p	7.77204	36.5794	44.3514	uacaguauagaugauguac	ggauaucaucauauacuguaaguuugcgaugagauacuacaguauagaugauguac	chr19	-
146	novel-88-3p	18.0849	25.4737	43.5586	ucuaguggauaagaaucugccu	acagguucuuuaccacuagugccugggaagccccucugguggucuaguggauaagaaucugccu	chr16	-
147	Goat-miR-542-5p	18.7575	23.8078	42.5653	ugugacagauugauaacugaaa	ucggggaucaucaugucacgagauaccacugugcacuugugacagauugauaacugaaa	chrX	+
148	novel-53-3p	20.1774	21.8643	42.0417	cgggacugguccuucucugagu	uacagaggcggcgcgggccccgccggggggcccggcgggacugguccuucucugagu	chr29	-
149	Goat-miR-6123-5p	19.3554	22.0032	41.3585	ugccaagcccacguucaaagg	ugccaagcccacguucaaaggcuguuucuucaaaguuaauggugccgccuuugagcugggaggggaagc	chr13	+
150	Goat-miR-2285ad-5p	19.6543	19.2267	38.881	aaaaaaguuuguuuggauuuuu	aaaaaaguuuguuuggauuuuuugugacaucuuacagaaaaacccaaaugaacuuuuugg	chr1	-
151	Goat-miR-33a-5p	17.5618	20.7538	38.3156	gugcauuguaguugcauugca	gugcauuguaguugcauugcauguuccggcggcaccgugcaauguuuccacagugcauca	chr5	+
152	Goat-miR-188-5p	16.4408	21.1008	37.5417	caucccuugcaugguggagggu	caucccuugcaugguggagggugagcuuucugaaaaccccucccacaugcaggguuugca	chrX	-
153	novel-17-3p	36.7677	0	36.7677	aaacccugaaugaacuuuuugg	aaaaaguucauuugggaucaucacacacuguuacagaaaacccugaaugaacuuuuugg	chrX	-
154	novel-32-3p	36.0951	0	36.0951	acaaccugaaugaacuuuuugg	aaaaagcucauuccgguuuugggcacaaugguguagaacaaccugaaugaacuuuuugg	chr8	-
155	Goat-miR-1296-5p	15.6935	19.3656	35.0591	uuagggcccuggcuccaucuccu	uuagggcccuggcuccaucuccuuuaggaaaaccuucuguggggaguggggcuuugacccuaacc	chr28	+
156	Goat-miR-204-5p	13.9	20.8926	34.7926	uucccuuugucauccuaugccu	uucccuuugucauccuaugccugagaauauaugaaggaggcugggaaggcaaagggacgu	chr8	-
157	novel-105-2-3p	0	32.97	32.97	aacaccugaaugaacuuuuugg	aaaaaguuccuuuggauuuuucuguaagaugcuauggaaaacaccugaaugaacuuuuugg	chr5	+
158	novel-105-5-3p	0	32.2759	32.2759	aagaccugaaugaacuuuuugg	aaagaauuuguuugguuuuuuuccuaaagauauuaugaaagaccugaaugaacuuuuugg	chr4	-
159	novel-1-5p	17.2629	14.9927	32.2556	aaaaaaguuuguuuggauuuuu	aaaaaaguuuguuuggauuuuuccuaaagaucuuauggaaaaaccugaacaaacuuuuggg	chr10	+
160	Goat-miR-324-5p	0	32.2065	32.2065	cgcauccccuagggcauuggugu	cgcauccccuagggcauugguguaaagcuggagacccacugccccaggugcugcuggg	chr19	-
161	novel-105-3-3p	0	32.1371	32.1371	aagaccugaaugaacuuuuugg	gaaaaggucguucggguuuuuacagcagauguucuggaaagaccugaaugaacuuuuugg	chr13	-
162	Goat-miR-7-1-5p	8.29516	23.669	31.9642	uggaagacuagugauuuuguuguu	uggaagacuagugauuuuguuguuuuuagauaacugaaucgacaacaaaucacagucugccaua	chr6	-
163	Goat-miR-7-2-5p	8.29516	23.669	31.9642	uggaagacuagugauuuuguuguu	uggaagacuagugauuuuguuguuuuuagauaacugaaucgacaacaaaucacagucugccaua	chr8	-
164	novel-105-4-3p	0	31.9289	31.9289	aagaccugaaugaacuuuuugg	uaaaguuuguuuggguuuuucuguacaucuuauggaaagaccugaaugaacuuuuugg	chr16	+
165	Goat-miR-328-3p	14.3484	17.2138	31.5622	cuggcccucucugcccuuccgu	gggggggcaggaggggcucagggagauagugugugcugccccuggcccucucugcccuuccgu	chr18	-
166	Goat-miR-7-3-5p	8.22042	23.0443	31.2647	uggaagacuagugauuuuguuguu	uggaagacuagugauuuuguuguucugauauacuaugacaacaagucacagcuuccuca	chr7	-
167	Goat-miR-34c-5p	14.2736	16.5891	30.8628	aggcaguguaguuagcugauugc	aggcaguguaguuagcugauugcuaauaauaccaaucacuaaccacacggccagg	chr15	+
168	novel-70-1-5p	13.9747	16.5197	30.4944	ucuguaguuuccuuuacucauaga	ucuguaguuuccuuuacucauagaacuaccuguuagaucugugggaaagaacuacaagaca	chr29	+
169	novel-70-2-5p	13.9747	16.5197	30.4944	ucuguaguuuccuuuacucauaga	ucuguaguuuccuuuacucauagaacuaccuguuagaucugugggaaagaacuacaagaca	chr24	+
170	Goat-miR-145-5p	9.04247	19.1573	28.1998	guccaguuuucccaggaaucccu	guccaguuuucccaggaaucccuuagaugcuaagauggggauuccuggaaauacuguucuu	chr7	+
171	novel-99-3p	13.7505	13.9515	27.7021	uuaggagaccagacuguggagc	ucagucugggcucuuaacuggacuugcaguuaggagaccagacuguggagc	chr19	-
172	Goat-miR-450a-5p	9.86451	16.9362	26.8007	uuuugcgauguguuccuaauau	uuuugcgauguguuccuaauauguaaucuaaauguauugggaacauuuugcauucau	chrX	+
173	novel-19-3p	13.1527	12.9104	26.063	aaacuggaacgaacuuuuuggcc	acaaaaaguccguucagauuuuuccauaagaugcuacaggaaaacuggaacgaacuuuuuggcc	chr2	+
174	novel-54-5p	13.1527	12.7715	25.9242	cucagcugggagagaauc	cucagcugggagagaaucugccugcagugcaggagacccagauucaaucccugaguu	chr2	+
175	Goat-miR-452-3p	25.1844	0	25.1844	ucagucucaucugcaaagaagu	uguuugcagaggaaacugagacuuuguaacuauaucucagucucaucugcaaagaagu	chrX	-
176	Goat-miR-29b3p	7.69731	17.4221	25.1194	uagcaccauuugaaaucaguguu	agcugguuucauauggugguuuagauuuaaauagugauugucuagcaccauuugaaaucaguguu	chr4	-
177	Goat-miR-545-5p	11.7328	13.3268	25.0596	ucaguaaauguuuauuggauga	ucaguaaauguuuauuggaugaauaaaugaauggcucaucaacaaacauuuauugugugc	chrX	+
178	novel-48-5p	12.5548	12.3551	24.9099	ccaggaguggagccugcgcc	ccaggaguggagccugcgccccugugguggggugcagagccccagccacuggcu	chr17	+
179	novel-41-5p	11.7328	12.4939	24.2267	auguccgcggguucccuauccc	auguccgcggguucccuaucccagguuggucgaguucacggaugcggaaccugcggauacgg	chr5	+
180	Goat-miR-3613-5p	10.014	13.6045	23.6184	uguuguacuuuuuuuuuuguuc	uguuguacuuuuuuuuuuguucguugcauuuuuaggaacaaaaaaaaaagcccaacccu	chr12	-
181	Goat-miR-1388-5p	8.96774	13.4657	22.4334	aggacuguccaaccugagaau	aggacuguccaaccugagaauggugagcauccagggacaaucucagguucgucagcccgca	chr13	+
182	novel-60-3p	0	22.2114	22.2114	ggagaggacaccgucugaguggu	gccauugaugaccguucuucucuucuuuuggaagaguaagagggagaggacaccgucugaguggu	chr19	-
183	Goat-miR-155-5p	10.2382	10.481	20.7192	uuaaugcuaaucgugauaggggu	uuaaugcuaaucgugauagggguuuuuaccucggacugacuccuacauguuagcauuaaca	chr1	-
184	novel-58-5p	9.04247	11.5916	20.634	gaugaggcucagcgagcccugg	gaugaggcucagcgagcccuggucccugugucugauucccagggcucgcugagccucaucu	chr17	+
185	Goat-miR-411a-5p	5.30591	14.2292	19.5351	auaguagaccguauagcguacg	auaguagaccguauagcguacgcuuuaucugugacguauguaacacgguccacuaac	chr21	+
186	Goat-miR-215-5p	19.2059	0	19.2059	ugaccuaugaauugacagacaa	ugaccuaugaauugacagacaaugggacuaagucugucugucauuucuguaggccaau	chr16	-
187	Goat-miR-628-5p	8.44462	10.4116	18.8562	augcugacauauuuacuagagg	augcugacauauuuacuagaggguaaaauuaauaaccuucuaguaagaguggcagucgaag	chr10	+
188	Goat-miR-345-3p	18.6081	0	18.6081	cccugaacuaggggucuggagg	gcugacuccuaguccagugcuugugauggcuggugggcccugaacuaggggucuggagg	chr21	+
189	novel-108-1-5p	9.49085	9.02338	18.5142	gccaaaaaguuuguuuggguuuu	gccaaaaaguuuguuuggguuuuucuguaauguuaugaaaaaaccgagugaacuuuugggc	chr3	-
190	novel-108-2-5p	9.49085	9.02338	18.5142	gccaaaaaguuuguuuggguuuu	gccaaaaaguuuguuuggguuuuucuauaguaucuuacaggaacaccugaaugaacuuuu	chrX	-
191	novel-47-5p	0	18.4632	18.4632	ccaggagucagacugcac	ccaggagucagacugcaccaccugcacuggaaagcgagcuccugacc	chr23	-
192	Goat-miR-218a-1-5p	8.66881	9.57866	18.2475	uugugcuugaucuaaccaugu	uugugcuugaucuaaccaugugguggaacgauggaaacggaacaugguucugucaagcaccgcg	chr20	-
193	Goat-miR-218a-2-5p	8.66881	9.57866	18.2475	uugugcuugaucuaaccaugu	uugugcuugaucuaaccaugugguugccagguaugaguaaaacaugguuccgucaagcaccaug	chr6	+
194	novel-45-3p	6.80053	11.3833	18.1839	cagcaaauccggauuccuccau	aggaauccggaucugcuccuccucggagagcagcaaauccggauuccuccau	chr18	-
195	novel-23-3p	8.66881	8.81514	17.484	aacaaccugaaugaacuuuuug	aaaaguucauucagguuuuccauaacauguuacagaacaaccugaaugaacuuuuug	chr16	-
196	Goat-miR-877-5p	6.27742	10.8975	17.1749	guagaggagauggcgcaggggaca	guagaggagauggcgcaggggacacgagcuaaaauggggggcuccugggaccccccaacauguguccucuucucccuccucccagg	chr23	-
197	novel-94-5p	16.3661	0	16.3661	uggggccgagggagccagccc	uggggccgagggagccagcccucaucaccgugcucuccccccuccccgc	chr4	-
198	novel-86-5p	0.822042	15.3397	16.1618	uccucaguagcucaauggu	uccucaguagcucaaugguaaagaaucuaccugcacugcaggagaccug	chr12	-
199	novel-7-3p	6.27742	8.81514	15.0926	aaaaccgacaugaacuuuuugg	agaaaguucauuugguuuuccuguaagcugagaaaaccgacaugaacuuuuugg	chr21	-
200	novel-13-3p	0	15.0621	15.0621	aaaaucugaaugaacuuuuugc	aaaaaaguucauucggauuuuuccauaagauagucauucggauuuuuccauaagauaguauggaaaaaucugaaugaacuuuuugc	chr9	+
201	Goat-miR-9-1-5p	6.50161	8.46809	14.9697	ucuuugguuaucuagcuguauga	ucuuugguuaucuagcuguaugaguguauuggucuucauaaagcuagauaaccgaaagua	chr22	-
202	Goat-miR-9-2-5p	6.50161	8.46809	14.9697	ucuuugguuaucuagcuguauga	ucuuugguuaucuagcuguaugagugguguggagucuucauaaagcuagauaaccgaaagua	chr3	+
203	Goat-miR-9-3-5p	6.50161	8.46809	14.9697	ucuuugguuaucuagcuguauga	ucuuugguuaucuagcuguaugaguguauuggucuucauaaagcuagauaaccgaaagua	chr7	-
204	Goat-miR-455-5p	3.06398	11.8692	14.9332	uaugugccuuuggacuacaucg	uaugugccuuuggacuacaucguggaagccagcaccaugcaguccaugggcauauacacu	chr8	+
205	Goat-miR-30f-5p	0.822042	13.8821	14.7042	uguaaacacccuacacucucagcu	uguaaacacccuacacucucagcugugcacagugagaaagcugggaggaggcuguuuacucu	chr14	+
206	novel-104-5p	14.2736	0	14.2736	uuuugcaacauguuccugaau	uuuugcaacauguuccugaauauuuaauauaaguauaucgggaacauuuugcauccau	chrX	+
207	Goat-miR-335-3p	6.20268	7.91281	14.1155	uuuuucauuauugcuccugacc	ucaagagcaauaacgaaaaauguuugucauaaaccguuuuucauuauugcuccugacc	chr4	+
208	Goat-miR-7865-3p	6.87526	6.5246	13.3999	cugacugccgccccccgcagg	cagggagggcaggggagggaggcugugugcaggccugcccugacugccgccccccgcagg	chr18	+
209	Goat-miR-381-3p	3.66183	9.37043	13.0323	uauacaagggcaagcucucugu	agcgagguugcccuuuguauauucgguuuuuugacguagaauauacaagggcaagcucucugu	chr21	+
210	Goat-miR-1-3p	1.04624	10.9669	12.0131	uggaauguaaagaaguauguau	acauacuucuuuaugugcccauauggaccugcuaagcuauggaauguaaagaaguauguau	chr13	-
211	Goat-miR-410-3p	4.33441	7.63516	11.9696	aauauaacacagauggccugu	agguugucugugaugaguucgcuuuauuaaugacgaauauaacacagauggccugu	chr21	+
212	novel-93-5p	11.8822	0	11.8822	uggcucugcgaggucggcucaa	uggcucugcgaggucggcucaaggugggucuggauguugagcaggccugucagggcguug	chr25	-
213	Goat-miR-345-5p	0	11.7998	11.7998	gcugacuccuaguccagugcu	gcugacuccuaguccagugcuugugauggcuggugggcccugaacuaggggucuggagg	chr21	+
214	Goat-miR-582-3p	4.85752	6.94106	11.7986	uaaccaguugaacaacugaaccc	uuacaguuguucaaccaguuacuaaucuaacuaauuguaaccaguugaacaacugaaccc	chr20	+
215	novel-22-3p	5.38064	6.24695	11.6276	aaaggccugaaugaacuuuuug	aaaaguuuguucaagcuuugccauaagaugguauggaaaggccugaaugaacuuuuug	chr11	+
216	novel-101-5p	4.40914	6.94106	11.3502	uuggacacuucaguacugcuaca	uggcagucagauauuguuuaacagaugaagugguuucuguuggacacuucaguacugcuaca	chr21	-
217	novel-80-3p	5.45537	5.69167	11.147	ucacugggcauccucugcuuua	aaguacaggaugcccaaugaauuaaauccaucuaaauacauuucacugggcauccucugcuuua	chr21	-
218	Goat-miR-122-5p	5.7543	5.34462	11.0989	uggagugugacaaugguguuu	uggagugugacaaugguguuuguguccaaacuaucaaacgccauuaucacacuaaaua	chr24	+
219	Goat-miR-202-5p	5.97849	4.92815	10.9066	uuccuaugcauauacuucuuu	uuccuaugcauauacuucuuugagggucuggccuaaagagguguagggcaugggaaaa	chr26	-
220	novel-102-5p	0	10.5504	10.5504	uuggcucugcgaggucggcuca	uuggcucugcgaggucggcucaaggugggucuggauguugagcaggccugucagggcguug	chr25	-
221	Goat-miR-150-5p	3.21344	7.28811	10.5016	ucucccaacccuuguaccagug	ucucccaacccuuguaccagugugugucuuggucccugguacagguacggggaggca	chr18	-
222	Goat-miR-6516-3p	4.33441	5.55285	9.88725	aucauguaugauacugcaaaca	uuugcaguaacaggugugaacauucuagcagcaguuugaugaucauguaugauacugcaaaca	chr19	+
223	Goat-miR-505-3p	4.93225	4.92815	9.86041	cgucaacacuugcugguuuccu	ggagccaggaaguauugauguuucugccaguuuagcgucaacacuugcugguuuccu	chrX	-
224	novel-14-3p	0	9.8563	9.8563	aaaaucugaaugaacuuuuuug	gaaaguucauucuggguuucucauaagaucaagugggaaaaucugaaugaacuuuuuug	chr19	+
225	Goat-miR-1306-5p	4.25967	5.55285	9.81252	ccaccuccccugcaaacgucca	ccaccuccccugcaaacguccagugaugcagacguaauggacguuggcucuggugguga	chr17	+
226	novel-3-5p	0	9.02338	9.02338	aaaaaguucguuuggguuuuu	aaaaaguucguuuggguuuuucuguaucagcauauggaaaaaccugaaggaaguuuuuga	chr12	+
227	Goat-miR-409-3p	2.3914	6.5246	8.91599	gaauguugcucggugaaccccu	agguuacccgagcaacuuugcaucuggacgacgaauguugcucggugaaccccu	chr21	+
228	novel-73-5p	3.66183	4.37287	8.03469	uagcagcacagaaauguuggua	uagcagcacagaaauguugguacugggaagagagccugccaauauuggcugugcugcucc	chr19	-
229	Goat-miR-20b-5p	3.06398	4.44228	7.50625	caaagugcucacagugcagguaguu	caaagugcucacagugcagguaguuuuggcaacauucuacuguagugugggcacuuccag	chrX	+
230	Goat-miR-1277-5p	7.39838	0	7.39838	uauauauauauauguacguaug	uauauauauauauguacguauguguauaugaauguauacguagauauauauguauuu	chrX	-
231	Goat-miR-219-5p	2.24193	5.13638	7.37832	ugauuguccaaacgcaauucuug	ugauuguccaaacgcaauucuuguacgagucugcggccaaccgagaauuguggcuggacaucugu	chr11	-
232	novel-15-3p	0	7.35752	7.35752	aaacaccugaaugaacuuuuug	caaaaguucauuuggauuuuuccaugacaucuuacaaaaacaccugaaugaacuuuuug	chr6	-
233	novel-42-5p	0	7.14929	7.14929	auuccgggcuucccucauggcu	auuccgggcuucccucauggcucagacgguaaagcaucugccugcaaugcgggagaccuggguu	chr3	-
234	Goat-miR-2285c-3p	3.88602	2.98466	6.87067	aaaccugaacaaacuuuuuggc	cacaaaguucguuuggguuuuucuagauguuauggacaaaccugaacaaacuuuuuggc	chr2	+
235	novel-96-5p	0	6.80224	6.80224	uuaaccacuggacuacccugga	uuaaccacuggacuacccuggaguuguggcuaaaaccacuaggugagagaauucccuggcaguccagugguuaggac	chr3	+
236	novel-33-3p	3.88602	2.91524	6.80126	acaucucagucacuuucuguu	aacagaaggugacuaagaugucaguuggaaagcaguugacaucucagucacuuucuguu	chr10	+
237	novel-107-1-5p	3.3629	3.33171	6.69461	cccaaaugaacuuguuggcc	ccaaaaaguucaguugaguuuuuccauaaagauguuacagaaaacccaaaugaacuuguuggcc	chr10	-
238	novel-81-3p	3.51236	3.12348	6.63584	ucacuguauaguuacccucuuu	aagaggguaacuauacagugaagguagcaucuaccauacuucacuguauaguuacccucuuu	chr16	+
239	Goat-miR-2284ab-5p	3.13871	3.47053	6.60924	uaaaaguuugguuggguuuuuc	uaaaaguuugguuggguuuuucuguagcaucugauggaaaaaucugaacaaacuuuccgg	chr6	+
240	novel-12-5p	3.81129	2.77642	6.58771	aaaaguucguuuggguuuuuc	aaaaguucguuuggguuuuuccagaacaucuuauggaaaaauccaaaggaauuuuuca	chr8	-
241	Goat-miR-2355-5p	0	5.96931	5.96931	auccccagauacaauggacaau	auccccagauacaauggacaauaugcuauuauaauuggguggcauuguccuugcuguuuggagaua	chr2	-
242	novel-69-5p	0	5.8999	5.8999	uaaaaguucguuuggguuuuuc	uaaaaguucguuuggguuuuuccguaacaucauacagaaaaccucaaacgaacuuuuuug	chrX	-
243	novel-8-3p	2.3914	3.40112	5.79252	aaaaccugaacgaacucuuugg	aaaaguucauuugugguuuuucucuaauaucuuauggaaaaaccugaacgaacucuuugg	chr5	-
244	Goat-miR-136-3p	1.79355	3.9564	5.74995	caucaucgucucaaaugagucu	acuccauuuguuuugaugauggauucuuacgcuccaucaucgucucaaaugagucu	chr21	+
245	novel-98-5p	2.46613	3.12348	5.5896	uuacaauacaaccugauaagug	uuacaauacaaccugauaagugcuguaacacuuaucagguuguauuauaaug	chrX	-
246	novel-34-5p	5.45537	0	5.45537	acugcuuuaaaaccuuugacag	acugcuuuaaaaccuuugacaggugcugggaugaucugucaaaaguuuuaaagcaguca	chr24	-
247	novel-100-3p	2.24193	3.05407	5.296	uugcucccuccacacuuccaga	aggaagugaggaaggagccagagcugcagcugaaaugagcugauggauccuugcucccuccacacuuccaga	chr19	-
248	Goat-miR-129-5p-1-5p	1.12097	4.16464	5.2856	cuuuuugcggucugggcuugc	cuuuuugcggucugggcuugcuguacauaacucaauagccggaagcccuuaccccaaaaagcau	chr15	+
249	Goat-miR-129-5p-2-5p	1.12097	4.16464	5.2856	cuuuuugcggucugggcuugc	cuuuuugcggucugggcuugcuguuccucucuacaguagucaggaagcccuuaccccaaaaagua	chr4	+
250	novel-107-2-5p	2.83978	2.35996	5.19974	cccaaaugaacuuguuggcc	ccaaaaaguucguuuggcuuuaaccagcagcugguacagaaaaccccaaaugaacuuguuggcc	chrX	+
251	Goat-miR-491-3p	2.54086	2.6376	5.17846	cuuaugcaagauucccuucuac	aguggggaacccuuccaugaggaguagaacacuccuuaugcaagauucccuucuac	chr8	-
252	Goat-miR-135a-5p	2.98925	1.9435	4.93274	uauggcuuuuuauuccuauguga	uauggcuuuuuauuccuaugugauucuacugcucacucauauagggauuggagccguggc	chr22	+
253	novel-26-3p	2.76505	2.01291	4.77796	aagaaccugaacgaaccuuuugg	agaaguucguuuggguuuuccuguaagaugguacagaagaaccugaacgaaccuuuugg	chr12	+
254	Goat-miR-654-3p	1.86828	2.84583	4.71411	uaugucugcugaccaucacc	uggugggcggcggagcaugugcuuccuucgugucauaugucugcugaccaucacc	chr21	+
255	Goat-miR-7859-5p	1.64408	3.05407	4.69815	augugaaauuaccaguauuugu	augugaaauuaccaguauuugucugcuuugaccuacaaaaacuggcagcuucaugua	chr10	+
256	novel-77-3p	0	4.51169	4.51169	ucaaaaguuuuaaagcaguca	acugcuuuaaaaccuuugacaggugcugggaugaucugucaaaaguuuuaaagcaguca	chr24	-
257	Goat-miR-133b-3p	0	4.44228	4.44228	uuugguccccuucaaccagcu	cuggucaaacggaaccaaguccgucuuccugagagguuugguccccuucaaccagcu	chr23	+
258	novel-97-5p	4.40914	0	4.40914	uguuugacaugagagcuuccaga	uguuugacaugagagcuuccagauugcagugaguugcugggggcuuccacgucugcaca	chr8	-
259	Goat-miR-671-3p	2.01774	2.29055	4.30829	uccgguucucagggcuccacc	aggaagcccuggaggggcuggaggugauggauguuuuccuccgguucucagggcuccacc	chr4	+
260	novel-38-5p	4.18494	0	4.18494	aggcugugaugauuggcgcaggggu	aggcugugaugauuggcgcagggguacggaccucagcugaugaugggagcugagugu	chr11	-
261	novel-39-3p	4.11021	0	4.11021	aguagauuuauaugaagaacucu	aguucuucauauaacucuacuucauuuaugugcacgaaguagauuuauaugaagaacucu	chr15	-
262	novel-103-5p	2.01774	2.01291	4.03065	uuugcaccucugagaguggaguaac	uuugcaccucugagaguggaguaacuccuccuguggaguugguccuagucugggugcaaacaguu	chr7	+
263	novel-16-3p	0	4.02581	4.02581	aaacccgaaugaacuuuuugg	aaaaguucguuuggguuuuccaugcaaugucacagaaacccgaaugaacuuuuugg	chr8	+
264	novel-57-5p	1.94301	2.08232	4.02533	gaacgaaauccaagcgcagcug	gaacgaaauccaagcgcagcuggaaugcucuggagacaacagcugcuuuugggauuccguugcc	chr22	-
265	novel-40-5p	1.34516	2.56819	3.91335	aguuguagacugaauuucaagu	aguuguagacugaauuucaaguugcauauuaugauagaaaaucuagaaauuaagucuacaacc	chr10	+
266	novel-49-5p	1.64408	2.22114	3.86522	cccagggauguagcuccuagugc	cccagggauguagcuccuagugcugacccucccucugggggcccaucccugcagu	chr10	+
267	novel-85-3p	0	3.74817	3.74817	uccggagaucucugaaugg	acagagaucucuggaggaucggcucugcaaaccuccagcucuacagucagauucguccggagaucucugaaugg	chr27	-
268	novel-37-5p	0	3.60935	3.60935	aguggggguuguaggacu	aguggggguuguaggacuaggcccuaacccucucucu	chrX	-
269	Goat-miR-208a-3p	0	3.53994	3.53994	auaagacgagcaaaaagcuugu	gagcuuuuggcccggguuauaccugaugcucacguauaagacgagcaaaaagcuugu	chr10	+
270	Goat-miR-153-1-3p	1.1957	2.22114	3.41684	uugcauagucacaaaagugauc	gucauuuuugugaucugcagcuaguauucucacuccaguugcauagucacaaaagugauc	chr2	-
271	Goat-miR-153-2-3p	1.1957	2.22114	3.41684	uugcauagucacaaaagugauc	ucauuuuugugauguugcagcuaguaauaugagcccaguugcauagucacaaaagugauc	chr4	-
272	novel-95-3p	1.79355	1.59644	3.38999	uguuuauuugaaguuuggcuc	accaaacuucagguaaacacuguuaguguggagaaguguuuauuugaaguuuggcuc	chr4	-
273	Goat-miR-326-3p	1.34516	1.9435	3.28866	ccucugggcccuuccuccagc	uggaggcagggccuuugugaaggcggguugugcucagaucgccucugggcccuuccuccagc	chr15	-
274	Goat-miR-449a-5p	1.27043	1.9435	3.21393	uggcaguguauuguuagcuggu	uggcaguguauuguuagcugguugaauaugugagugccaucagcuaacaugcaacugcuauc	chr20	+
275	novel-55-5p	1.27043	1.9435	3.21393	cugaugcucugugcagggcccg	cugaugcucugugcagggcccgccaucuguccaggggccugcacacgagcaucagc	chr3	-
276	novel-68-5p	1.56935	1.59644	3.1658	guugcagguuugaauccug	guugcagguuugaauccugaucucaccauucucaggggugggcauaggacccagccagucauau	chr2	+
277	novel-62-5p	1.04624	2.08232	3.12855	ggggggcgggccggggcg	ggggggcgggccggggcgccucagccguccuuggccuccccugccugcccccgac	chr18	-
278	Goat-miR-34b-5p	1.41989	1.66585	3.08575	aggcaguguaauuagcugauugu	aggcaguguaauuagcugauuguacucucaugcuuacaaucacuaguuccacugccauc	chr15	+
279	novel-106-1-5p	1.34516	1.73526	3.08043	aauaaguucguuuggguuuuuc	aauaaguucguuuggguuuuuccauaacauccuacagaaaaacccagaugagcuuuuu	chr8	-
280	novel-106-2-5p	1.34516	1.73526	3.08043	aauaaguucguuuggguuuuuc	aauaaguucguuuggguuuuuccauaagauacagcaggaaaaacccaagcaaacguucugg	chr17	+
281	Goat-miR-95-3p	1.27043	1.73526	3.00569	uucaacggguauuuauugagc	ucaauaaauguuuguugaauugagaugcgcuaaguucaacggguauuuauugagc	chr6	-
282	novel-51-3p	2.76505	0.208232	2.97328	ccggagaucucugaaugg	acagagaucucuggaggaucggcucugcaaaccuccagcucuacagucagauucguccggagaucucugaaugg	chr27	-
283	novel-83-3p	1.12097	1.73526	2.85623	uccccaucacaauggacugugc	aaguucauuguugcugggucaguguccagauuccuuccccaucacaauggacugugc	chr7	+
284	novel-11-3p	1.79355	1.04116	2.83471	aaaaccuugaugaacuuuuuga	aaaaaguucauuugggcuuuuuuguaagauguuacaggaaaaccuugaugaacuuuuuga	chr4	-
285	novel-79-5p	1.27043	1.38821	2.65864	ucaacucugccugggacu	ucaacucugccugggacuggcagauuuccauuaaacaucuuaguggaucuucucuagucugaggucugcuc	chr12	-
286	novel-74-3p	0	2.6376	2.6376	uaggacaugucagggccuggcu	uggggugccugccuagucccuguuaugcguugcuauggaagcuaggacaugucagggccuggcu	chr21	-
287	novel-35-5p	1.34516	1.24939	2.59455	agagaucuguccugaaaccagc	agagaucuguccugaaaccagcauaaacuagcagcugccaugcugguuucaggacagaucucu	chr23	-
288	novel-50-5p	1.34516	1.24939	2.59455	cccccgugaugagagucugagg	cccccgugaugagagucugaggucuagggggagucacuccagcccuucagacccagacucuggggagcagggcaugcc	chr15	+
289	novel-5-3p	2.3914	0	2.3914	aaaaccagaacgaacuuuuugu	caaaagcucauucggguuuuucuguaagauauuaugggaaaaccagaacgaacuuuuugu	chr19	-
290	novel-20-3p	1.27043	1.04116	2.31159	aaacuugaaugaacucuuuggu	aaaaagaucauuuggguuuuucugaugauguuauggaaaacuugaaugaacucuuuggu	chr5	+
291	novel-89-3p	0	2.29055	2.29055	ucucugucuucaauccuguagu	ucaggaguuggggacgggguggcguggucugugaccucucucugucuucaauccuguagu	chr18	-
292	novel-18-3p	2.24193	0	2.24193	aaacucgugucugauucguu	cgaaucagacacgaguuugaggaucaggaaggaaucaaacucgugucugauucguu	chr4	+
293	Goat-miR-196b-5p	0	2.22114	2.22114	uagguaguuuccuguuguuggga	uagguaguuuccuguuguugggauccaccuuucucucgacagcacgacacugccuuca	chr4	+
294	novel-78-3p	0	2.15173	2.15173	ucaaacucgugucugauucguu	acgaaucagacacgaguuugaggaucaggaaggaaucaaacucgugucugauucguu	chr4	+
295	novel-75-5p	1.71882	0.347053	2.06587	uagucuccuguugucacuggucu	uagucuccuguugucacuggucuuaagagggcagaagaccagcuggacuggggacuagg	chr10	+
296	novel-71-3p	1.04624	0.971748	2.01798	uaauuuuugcaaggcuuuucc	aaaagccuugcaaaaauuaauuuuuauuuuauuaauuaauuuuugcaaggcuuuucc	chr19	+
297	novel-66-3p	1.04624	0.902338	1.94857	guagggaccucucaugucugugc	auagacguugaguacucccuauuuaauaggucaggagaccuagggcuguagggaccucucaugucugugc	chr22	+
298	novel-61-3p	0	1.9435	1.9435	gggccggggccgggggcgg	aggcuuggcucugccccgggaaccgaacggggccggggccgggggcgg	chr18	-
299	novel-27-3p	1.12097	0.763516	1.88448	aagacccaaacgaacuuuuugg	aaaaaagucguuuggguuuuucuauaagcuguuacagaaagacccaaacgaacuuuuugg	chr4	+
300	novel-90-3p	0	1.80468	1.80468	ucugaguaacguaccugguau	accaguuagguuacucagaguaaguaucaguaacuaacugguuacucugaguaacguaccugguau	chr26	+
301	novel-92-5p	1.71882	0	1.71882	uggccaaaagguuuguucagau	uggccaaaagguuuguucagauuuuucuguaauaaaccugaacaaaccuuuuggccaac	chr3	-
302	Goat-miR-214-3p	0.523118	1.17998	1.7031	acagcaggcacagacaggcagu	gccugucuacacuugcugugcagaacauccgcucaccuguacagcaggcacagacaggcagu	chr16	-
303	Goat-miR-493-5p	0.448387	1.24939	1.69778	uuguacaugguaggcuuucauu	uuguacaugguaggcuuucauucauucguuugcacauucggugaaggucuacugugugccagg	chr21	+
304	novel-2-3p	0	1.66585	1.66585	aaaaacuagaaugaacuuuuug	aaaaaguucauucagguuuuucuguaagaugguguggaaaaacuagaaugaacuuuuug	chr13	-
305	novel-30-3p	0	1.66585	1.66585	aauuuuugcaaggcuuuucc	aaaagccuugcaaaaauuaauuuuuauuuuauuaauuaauuuuugcaaggcuuuucc	chr19	+
306	novel-91-5p	0	1.66585	1.66585	ucuggugcuuagacucugugcu	ucuggugcuuagacucugugcuuccauccuaaggcagcaggguuugggcagcagagg	chr6	+
307	novel-44-3p	1.49462	0	1.49462	cacauggaguugcuguuacaau	aguaacagcaucuccacuggaaauugacgcacaguccacauggaguugcuguuacaau	chr16	+
308	novel-52-3p	1.49462	0	1.49462	ccggcagcacagagcucagc	agaggcucgggcgccccacgccccacccuggagccuggccacgggcugacagguggggccggcagcacagagcucagc	chr19	-
309	novel-24-5p	1.41989	0	1.41989	aacagucuguucagguuuucc	aacagucuguucagguuuuccuguaaggugcuauaggaaaacccgaacaaacuuugug	chr10	+
310	novel-36-5p	0	1.24939	1.24939	aguaaguuuguucggguuuguc	aguaaguuuguucggguuuguccauaggcuguaacagaaaaacccaaaugaacuuaaugg	chr28	+
311	novel-64-3p	0	1.24939	1.24939	ggucacugguucgaucccug	gugcggucgaugagaguccacugccgaugcagcggucacugguucgaucccug	chr18	+
312	novel-65-3p	0	1.24939	1.24939	guaaaccugaacgaacuuuuuu	aaaaguucauucgggguuuucuggcugauguaaaccugaacgaacuuuuuu	chr14	-
313	novel-82-3p	0	1.24939	1.24939	ucagggcagcucuggccaccc	uuugcuggugcugcccuggcccugggccaggucagggcagcucuggccaccc	chr2	-
314	Goat-miR-503-1-5p	1.1957	0	1.1957	uagcagcgggaacaguacugcag	uagcagcgggaacaguacugcagugggcgaucggugaucuggaguauuguuucugcugcccgg	chrX	+
315	novel-63-5p	0	1.17998	1.17998	ggggucgcggggguggga	ggggucgcgggggugggaggguggacaaugccaugcuucucucucagugaccccuc	chr8	-
316	novel-59-3p	1.12097	0	1.12097	gaugugaaacccaggccccgac	ccggaggccuuagcucacugcccgcuucuccauguggggaugugaaacccaggccccgac	chr25	+
317	novel-46-5p	0	1.11057	1.11057	ccagcuaggcugagggacu	ccagcuaggcugagggacucacccaucagugucccccggccacugcccgggucauccccauggugccugcgcuggcu	chr1	-
318	novel-87-3p	0	1.11057	1.11057	ucggggucggaggaagguucu	uccuuccucgcccuacccgacccugcagugucauuucaggucggggucggaggaagguucu	chr11	-
319	novel-25-5p	1.04624	0	1.04624	aaccagcuaggcugagggacu	aaccagcuaggcugagggacucacccaucagugucccccggccacugcccgggucauccccauggugccugcgcuggcugg	chr1	-
320	novel-31-3p	1.04624	0	1.04624	aaugauggaggcacacggcuc	agccaugugccuccauccuaggcuuccauccaggcugagacauggccaaugauggaggcacacggcuc	chr19	-
321	Goat-miR-147-3p	0	1.04116	1.04116	gugugcggaaaugcuucugcu	uggaaacacuucugcacaaacuagauuauggauaccagugugcggaaaugcuucugcu	chr10	-

## Sheet: Table S2
Table S2. Sequence information of novel miRNAs in goat hair follicles.
miRNA Name	Normalized Expression			Rank	Mature Sequence	Precursor Sequence	Genome Location	Strand
	WF(white follicle)	BF(black follicle)	Sum of 2 tissues
novel-84-3p	195.347	203.442	398.79	83	uccccugcaucuccacca	ggcuacagucugugggguugcagaguuggacacaacugagcacauccccugcaucuccacca	chr8	-
novel-9-3p	94.4602	84.195	178.655	107	aaaaccugaaugaacuuuugag	aaaauguucaugcagguuuuuccguaagauguuacaggaaaaccugaaugaacuuuugag	chrX	+
novel-21-3p	58.8881	53.7238	112.612	117	aaagccugaaugaacuuuuugg	caauaaguucguuuggguuuuuggcuguuacagaaagccugaaugaacuuuuugg	chrX	+
novel-29-5p	105.147	0	105.147	118	aagguagauagaacaggucuug	aagguagauagaacaggucuugugugcaaaaugaauucaagaccuacuuaucuaccaacagc	chr21	+
novel-76-5p	42.6715	40.6052	83.2767	123	uauugcacauuacuaaguugc	uauugcacauuacuaaguugcauguugucacggccucagugcaauuuagugugugugauauu	chr8	-
novel-10-3p	41.1769	34.6359	75.8127	129	aaaaccugaaugaacuuuuuga	gaaaguuuguuuggguuuuuccauuccauuuuaugguaaaaccugaaugaacuuuuuga	chr13	+
novel-4-5p	41.5505	27.6254	69.1759	131	aaaaauuuguucggguuuuucu	aaaaauuuguucggguuuuucuguaagauaagaugguacagaaaaaccugagcaaacuuuuug	chr10	-
novel-56-5p	39.6822	25.5431	65.2253	134	cuggacuuggggucagaaggcu	cuggacuuggggucagaaggcuggcccuggugccagcagugccugaguccuaagauccuucc	chr21	+
novel-43-5p	32.1344	32.4842	64.6185	136	caaaaaguucguuuggguuuuu	caaaaaguucguuuggguuuuuccauacgguuuuacagaaaacccaaacgaacuuguuggcc	chr6	-
novel-28-3p	23.5403	37.9676	61.5079	137	aagggacccgaacgaacuuuuugg	caaaaguucuuuuggguuuucccauaacaucuuguggaagggacccgaacgaacuuuuugg	chr5	+
novel-6-3p	31.3123	27.9031	59.2154	138	aaaacccgaaugaacuuuuugg	gaaagguucauuuggguuuuuuggaacaguuacaggaaaacccgaaugaacuuuuugg	chr12	-
novel-105-1-3p	31.7607	26.6537	58.4144	139	aacaccugaaugaacuuuuugg	aaaaagugcauucagauuuuacuggaagaugguacugaacaccugaaugaacuuuuugg	chr10	-
novel-67-5p	29.9672	27.209	57.1761	140	gucaaaaaauucguuuggguuu	gucaaaaaauucguuuggguuuugcccauaaggucuaugaaaaaacccaaacgaacuuuuuggcc	chr25	+
novel-72-3p	7.77204	36.5794	44.3514	145	uacaguauagaugauguac	ggauaucaucauauacuguaaguuugcgaugagauacuacaguauagaugauguac	chr19	-
novel-88-3p	18.0849	25.4737	43.5586	146	ucuaguggauaagaaucugccu	acagguucuuuaccacuagugccugggaagccccucugguggucuaguggauaagaaucugccu	chr16	-
novel-53-3p	20.1774	21.8643	42.0417	148	cgggacugguccuucucugagu	uacagaggcggcgcgggccccgccggggggcccggcgggacugguccuucucugagu	chr29	-
novel-17-3p	36.7677	0	36.7677	153	aaacccugaaugaacuuuuugg	aaaaaguucauuugggaucaucacacacuguuacagaaaacccugaaugaacuuuuugg	chrX	-
novel-32-3p	36.0951	0	36.0951	154	acaaccugaaugaacuuuuugg	aaaaagcucauuccgguuuugggcacaaugguguagaacaaccugaaugaacuuuuugg	chr8	-
novel-105-2-3p	0	32.97	32.97	157	aacaccugaaugaacuuuuugg	aaaaaguuccuuuggauuuuucuguaagaugcuauggaaaacaccugaaugaacuuuuugg	chr5	+
novel-105-5-3p	0	32.2759	32.2759	158	aagaccugaaugaacuuuuugg	aaagaauuuguuugguuuuuuuccuaaagauauuaugaaagaccugaaugaacuuuuugg	chr4	-
novel-1-5p	17.2629	14.9927	32.2556	159	aaaaaaguuuguuuggauuuuu	aaaaaaguuuguuuggauuuuuccuaaagaucuuauggaaaaaccugaacaaacuuuuggg	chr10	+
novel-105-3-3p	0	32.1371	32.1371	161	aagaccugaaugaacuuuuugg	gaaaaggucguucggguuuuuacagcagauguucuggaaagaccugaaugaacuuuuugg	chr13	-
novel-105-4-3p	0	31.9289	31.9289	164	aagaccugaaugaacuuuuugg	uaaaguuuguuuggguuuuucuguacaucuuauggaaagaccugaaugaacuuuuugg	chr16	+
novel-70-1-5p	13.9747	16.5197	30.4944	168	ucuguaguuuccuuuacucauaga	ucuguaguuuccuuuacucauagaacuaccuguuagaucugugggaaagaacuacaagaca	chr29	+
novel-70-2-5p	13.9747	16.5197	30.4944	169	ucuguaguuuccuuuacucauaga	ucuguaguuuccuuuacucauagaacuaccuguuagaucugugggaaagaacuacaagaca	chr24	+
novel-99-3p	13.7505	13.9515	27.7021	171	uuaggagaccagacuguggagc	ucagucugggcucuuaacuggacuugcaguuaggagaccagacuguggagc	chr19	-
novel-19-3p	13.1527	12.9104	26.063	173	aaacuggaacgaacuuuuuggcc	acaaaaaguccguucagauuuuuccauaagaugcuacaggaaaacuggaacgaacuuuuuggcc	chr2	+
novel-54-5p	13.1527	12.7715	25.9242	174	cucagcugggagagaauc	cucagcugggagagaaucugccugcagugcaggagacccagauucaaucccugaguu	chr2	+
novel-48-5p	12.5548	12.3551	24.9099	178	ccaggaguggagccugcgcc	ccaggaguggagccugcgccccugugguggggugcagagccccagccacuggcu	chr17	+
novel-41-5p	11.7328	12.4939	24.2267	179	auguccgcggguucccuauccc	auguccgcggguucccuaucccagguuggucgaguucacggaugcggaaccugcggauacgg	chr5	+
novel-60-3p	0	22.2114	22.2114	182	ggagaggacaccgucugaguggu	gccauugaugaccguucuucucuucuuuuggaagaguaagagggagaggacaccgucugaguggu	chr19	-
novel-58-5p	9.04247	11.5916	20.634	184	gaugaggcucagcgagcccugg	gaugaggcucagcgagcccuggucccugugucugauucccagggcucgcugagccucaucu	chr17	+
novel-108-1-5p	9.49085	9.02338	18.5142	189	gccaaaaaguuuguuuggguuuu	gccaaaaaguuuguuuggguuuuucuguaauguuaugaaaaaaccgagugaacuuuugggc	chr3	-
novel-108-2-5p	9.49085	9.02338	18.5142	190	gccaaaaaguuuguuuggguuuu	gccaaaaaguuuguuuggguuuuucuauaguaucuuacaggaacaccugaaugaacuuuu	chrX	-
novel-47-5p	0	18.4632	18.4632	191	ccaggagucagacugcac	ccaggagucagacugcaccaccugcacuggaaagcgagcuccugacc	chr23	-
novel-45-3p	6.80053	11.3833	18.1839	194	cagcaaauccggauuccuccau	aggaauccggaucugcuccuccucggagagcagcaaauccggauuccuccau	chr18	-
novel-23-3p	8.66881	8.81514	17.484	195	aacaaccugaaugaacuuuuug	aaaaguucauucagguuuuccauaacauguuacagaacaaccugaaugaacuuuuug	chr16	-
novel-94-5p	16.3661	0	16.3661	197	uggggccgagggagccagccc	uggggccgagggagccagcccucaucaccgugcucuccccccuccccgc	chr4	-
novel-86-5p	0.822042	15.3397	16.1618	198	uccucaguagcucaauggu	uccucaguagcucaaugguaaagaaucuaccugcacugcaggagaccug	chr12	-
novel-7-3p	6.27742	8.81514	15.0926	199	aaaaccgacaugaacuuuuugg	agaaaguucauuugguuuuccuguaagcugagaaaaccgacaugaacuuuuugg	chr21	-
novel-13-3p	0	15.0621	15.0621	200	aaaaucugaaugaacuuuuugc	aaaaaaguucauucggauuuuuccauaagauagucauucggauuuuuccauaagauaguauggaaaaaucugaaugaacuuuuugc	chr9	+
novel-104-5p	14.2736	0	14.2736	206	uuuugcaacauguuccugaau	uuuugcaacauguuccugaauauuuaauauaaguauaucgggaacauuuugcauccau	chrX	+
novel-93-5p	11.8822	0	11.8822	212	uggcucugcgaggucggcucaa	uggcucugcgaggucggcucaaggugggucuggauguugagcaggccugucagggcguug	chr25	-
novel-22-3p	5.38064	6.24695	11.6276	215	aaaggccugaaugaacuuuuug	aaaaguuuguucaagcuuugccauaagaugguauggaaaggccugaaugaacuuuuug	chr11	+
novel-101-5p	4.40914	6.94106	11.3502	216	uuggacacuucaguacugcuaca	uggcagucagauauuguuuaacagaugaagugguuucuguuggacacuucaguacugcuaca	chr21	-
novel-80-3p	5.45537	5.69167	11.147	217	ucacugggcauccucugcuuua	aaguacaggaugcccaaugaauuaaauccaucuaaauacauuucacugggcauccucugcuuua	chr21	-
novel-102-5p	0	10.5504	10.5504	220	uuggcucugcgaggucggcuca	uuggcucugcgaggucggcucaaggugggucuggauguugagcaggccugucagggcguug	chr25	-
novel-14-3p	0	9.8563	9.8563	224	aaaaucugaaugaacuuuuuug	gaaaguucauucuggguuucucauaagaucaagugggaaaaucugaaugaacuuuuuug	chr19	+
novel-3-5p	0	9.02338	9.02338	226	aaaaaguucguuuggguuuuu	aaaaaguucguuuggguuuuucuguaucagcauauggaaaaaccugaaggaaguuuuuga	chr12	+
novel-73-5p	3.66183	4.37287	8.03469	228	uagcagcacagaaauguuggua	uagcagcacagaaauguugguacugggaagagagccugccaauauuggcugugcugcucc	chr19	-
novel-15-3p	0	7.35752	7.35752	232	aaacaccugaaugaacuuuuug	caaaaguucauuuggauuuuuccaugacaucuuacaaaaacaccugaaugaacuuuuug	chr6	-
novel-42-5p	0	7.14929	7.14929	233	auuccgggcuucccucauggcu	auuccgggcuucccucauggcucagacgguaaagcaucugccugcaaugcgggagaccuggguu	chr3	-
novel-96-5p	0	6.80224	6.80224	235	uuaaccacuggacuacccugga	uuaaccacuggacuacccuggaguuguggcuaaaaccacuaggugagagaauucccuggcaguccagugguuaggac	chr3	+
novel-33-3p	3.88602	2.91524	6.80126	236	acaucucagucacuuucuguu	aacagaaggugacuaagaugucaguuggaaagcaguugacaucucagucacuuucuguu	chr10	+
novel-107-1-5p	3.3629	3.33171	6.69461	237	cccaaaugaacuuguuggcc	ccaaaaaguucaguugaguuuuuccauaaagauguuacagaaaacccaaaugaacuuguuggcc	chr10	-
novel-81-3p	3.51236	3.12348	6.63584	238	ucacuguauaguuacccucuuu	aagaggguaacuauacagugaagguagcaucuaccauacuucacuguauaguuacccucuuu	chr16	+
novel-12-5p	3.81129	2.77642	6.58771	240	aaaaguucguuuggguuuuuc	aaaaguucguuuggguuuuuccagaacaucuuauggaaaaauccaaaggaauuuuuca	chr8	-
novel-69-5p	0	5.8999	5.8999	242	uaaaaguucguuuggguuuuuc	uaaaaguucguuuggguuuuuccguaacaucauacagaaaaccucaaacgaacuuuuuug	chrX	-
novel-8-3p	2.3914	3.40112	5.79252	243	aaaaccugaacgaacucuuugg	aaaaguucauuugugguuuuucucuaauaucuuauggaaaaaccugaacgaacucuuugg	chr5	-
novel-98-5p	2.46613	3.12348	5.5896	245	uuacaauacaaccugauaagug	uuacaauacaaccugauaagugcuguaacacuuaucagguuguauuauaaug	chrX	-
novel-34-5p	5.45537	0	5.45537	246	acugcuuuaaaaccuuugacag	acugcuuuaaaaccuuugacaggugcugggaugaucugucaaaaguuuuaaagcaguca	chr24	-
novel-100-3p	2.24193	3.05407	5.296	247	uugcucccuccacacuuccaga	aggaagugaggaaggagccagagcugcagcugaaaugagcugauggauccuugcucccuccacacuuccaga	chr19	-
novel-107-2-5p	2.83978	2.35996	5.19974	250	cccaaaugaacuuguuggcc	ccaaaaaguucguuuggcuuuaaccagcagcugguacagaaaaccccaaaugaacuuguuggcc	chrX	+
novel-26-3p	2.76505	2.01291	4.77796	253	aagaaccugaacgaaccuuuugg	agaaguucguuuggguuuuccuguaagaugguacagaagaaccugaacgaaccuuuugg	chr12	+
novel-77-3p	0	4.51169	4.51169	256	ucaaaaguuuuaaagcaguca	acugcuuuaaaaccuuugacaggugcugggaugaucugucaaaaguuuuaaagcaguca	chr24	-
novel-97-5p	4.40914	0	4.40914	258	uguuugacaugagagcuuccaga	uguuugacaugagagcuuccagauugcagugaguugcugggggcuuccacgucugcaca	chr8	-
novel-38-5p	4.18494	0	4.18494	260	aggcugugaugauuggcgcaggggu	aggcugugaugauuggcgcagggguacggaccucagcugaugaugggagcugagugu	chr11	-
novel-39-3p	4.11021	0	4.11021	261	aguagauuuauaugaagaacucu	aguucuucauauaacucuacuucauuuaugugcacgaaguagauuuauaugaagaacucu	chr15	-
novel-103-5p	2.01774	2.01291	4.03065	262	uuugcaccucugagaguggaguaac	uuugcaccucugagaguggaguaacuccuccuguggaguugguccuagucugggugcaaacaguu	chr7	+
novel-16-3p	0	4.02581	4.02581	263	aaacccgaaugaacuuuuugg	aaaaguucguuuggguuuuccaugcaaugucacagaaacccgaaugaacuuuuugg	chr8	+
novel-57-5p	1.94301	2.08232	4.02533	264	gaacgaaauccaagcgcagcug	gaacgaaauccaagcgcagcuggaaugcucuggagacaacagcugcuuuugggauuccguugcc	chr22	-
novel-40-5p	1.34516	2.56819	3.91335	265	aguuguagacugaauuucaagu	aguuguagacugaauuucaaguugcauauuaugauagaaaaucuagaaauuaagucuacaacc	chr10	+
novel-49-5p	1.64408	2.22114	3.86522	266	cccagggauguagcuccuagugc	cccagggauguagcuccuagugcugacccucccucugggggcccaucccugcagu	chr10	+
novel-85-3p	0	3.74817	3.74817	267	uccggagaucucugaaugg	acagagaucucuggaggaucggcucugcaaaccuccagcucuacagucagauucguccggagaucucugaaugg	chr27	-
novel-37-5p	0	3.60935	3.60935	268	aguggggguuguaggacu	aguggggguuguaggacuaggcccuaacccucucucu	chrX	-
novel-95-3p	1.79355	1.59644	3.38999	272	uguuuauuugaaguuuggcuc	accaaacuucagguaaacacuguuaguguggagaaguguuuauuugaaguuuggcuc	chr4	-
novel-55-5p	1.27043	1.9435	3.21393	275	cugaugcucugugcagggcccg	cugaugcucugugcagggcccgccaucuguccaggggccugcacacgagcaucagc	chr3	-
novel-68-5p	1.56935	1.59644	3.1658	276	guugcagguuugaauccug	guugcagguuugaauccugaucucaccauucucaggggugggcauaggacccagccagucauau	chr2	+
novel-62-5p	1.04624	2.08232	3.12855	277	ggggggcgggccggggcg	ggggggcgggccggggcgccucagccguccuuggccuccccugccugcccccgac	chr18	-
novel-106-1-5p	1.34516	1.73526	3.08043	279	aauaaguucguuuggguuuuuc	aauaaguucguuuggguuuuuccauaacauccuacagaaaaacccagaugagcuuuuu	chr8	-
novel-106-2-5p	1.34516	1.73526	3.08043	280	aauaaguucguuuggguuuuuc	aauaaguucguuuggguuuuuccauaagauacagcaggaaaaacccaagcaaacguucugg	chr17	+
novel-51-3p	2.76505	0.208232	2.97328	282	ccggagaucucugaaugg	acagagaucucuggaggaucggcucugcaaaccuccagcucuacagucagauucguccggagaucucugaaugg	chr27	-
novel-83-3p	1.12097	1.73526	2.85623	283	uccccaucacaauggacugugc	aaguucauuguugcugggucaguguccagauuccuuccccaucacaauggacugugc	chr7	+
novel-11-3p	1.79355	1.04116	2.83471	284	aaaaccuugaugaacuuuuuga	aaaaaguucauuugggcuuuuuuguaagauguuacaggaaaaccuugaugaacuuuuuga	chr4	-
novel-79-5p	1.27043	1.38821	2.65864	285	ucaacucugccugggacu	ucaacucugccugggacuggcagauuuccauuaaacaucuuaguggaucuucucuagucugaggucugcuc	chr12	-
novel-74-3p	0	2.6376	2.6376	286	uaggacaugucagggccuggcu	uggggugccugccuagucccuguuaugcguugcuauggaagcuaggacaugucagggccuggcu	chr21	-
novel-35-5p	1.34516	1.24939	2.59455	287	agagaucuguccugaaaccagc	agagaucuguccugaaaccagcauaaacuagcagcugccaugcugguuucaggacagaucucu	chr23	-
novel-50-5p	1.34516	1.24939	2.59455	288	cccccgugaugagagucugagg	cccccgugaugagagucugaggucuagggggagucacuccagcccuucagacccagacucuggggagcagggcaugcc	chr15	+
novel-5-3p	2.3914	0	2.3914	289	aaaaccagaacgaacuuuuugu	caaaagcucauucggguuuuucuguaagauauuaugggaaaaccagaacgaacuuuuugu	chr19	-
novel-20-3p	1.27043	1.04116	2.31159	290	aaacuugaaugaacucuuuggu	aaaaagaucauuuggguuuuucugaugauguuauggaaaacuugaaugaacucuuuggu	chr5	+
novel-89-3p	0	2.29055	2.29055	291	ucucugucuucaauccuguagu	ucaggaguuggggacgggguggcguggucugugaccucucucugucuucaauccuguagu	chr18	-
novel-18-3p	2.24193	0	2.24193	292	aaacucgugucugauucguu	cgaaucagacacgaguuugaggaucaggaaggaaucaaacucgugucugauucguu	chr4	+
novel-78-3p	0	2.15173	2.15173	294	ucaaacucgugucugauucguu	acgaaucagacacgaguuugaggaucaggaaggaaucaaacucgugucugauucguu	chr4	+
novel-75-5p	1.71882	0.347053	2.06587	295	uagucuccuguugucacuggucu	uagucuccuguugucacuggucuuaagagggcagaagaccagcuggacuggggacuagg	chr10	+
novel-71-3p	1.04624	0.971748	2.01798	296	uaauuuuugcaaggcuuuucc	aaaagccuugcaaaaauuaauuuuuauuuuauuaauuaauuuuugcaaggcuuuucc	chr19	+
novel-66-3p	1.04624	0.902338	1.94857	297	guagggaccucucaugucugugc	auagacguugaguacucccuauuuaauaggucaggagaccuagggcuguagggaccucucaugucugugc	chr22	+
novel-61-3p	0	1.9435	1.9435	298	gggccggggccgggggcgg	aggcuuggcucugccccgggaaccgaacggggccggggccgggggcgg	chr18	-
novel-27-3p	1.12097	0.763516	1.88448	299	aagacccaaacgaacuuuuugg	aaaaaagucguuuggguuuuucuauaagcuguuacagaaagacccaaacgaacuuuuugg	chr4	+
novel-90-3p	0	1.80468	1.80468	300	ucugaguaacguaccugguau	accaguuagguuacucagaguaaguaucaguaacuaacugguuacucugaguaacguaccugguau	chr26	+
novel-92-5p	1.71882	0	1.71882	301	uggccaaaagguuuguucagau	uggccaaaagguuuguucagauuuuucuguaauaaaccugaacaaaccuuuuggccaac	chr3	-
novel-2-3p	0	1.66585	1.66585	304	aaaaacuagaaugaacuuuuug	aaaaaguucauucagguuuuucuguaagaugguguggaaaaacuagaaugaacuuuuug	chr13	-
novel-30-3p	0	1.66585	1.66585	305	aauuuuugcaaggcuuuucc	aaaagccuugcaaaaauuaauuuuuauuuuauuaauuaauuuuugcaaggcuuuucc	chr19	+
novel-91-5p	0	1.66585	1.66585	306	ucuggugcuuagacucugugcu	ucuggugcuuagacucugugcuuccauccuaaggcagcaggguuugggcagcagagg	chr6	+
novel-44-3p	1.49462	0	1.49462	307	cacauggaguugcuguuacaau	aguaacagcaucuccacuggaaauugacgcacaguccacauggaguugcuguuacaau	chr16	+
novel-52-3p	1.49462	0	1.49462	308	ccggcagcacagagcucagc	agaggcucgggcgccccacgccccacccuggagccuggccacgggcugacagguggggccggcagcacagagcucagc	chr19	-
novel-24-5p	1.41989	0	1.41989	309	aacagucuguucagguuuucc	aacagucuguucagguuuuccuguaaggugcuauaggaaaacccgaacaaacuuugug	chr10	+
novel-36-5p	0	1.24939	1.24939	310	aguaaguuuguucggguuuguc	aguaaguuuguucggguuuguccauaggcuguaacagaaaaacccaaaugaacuuaaugg	chr28	+
novel-64-3p	0	1.24939	1.24939	311	ggucacugguucgaucccug	gugcggucgaugagaguccacugccgaugcagcggucacugguucgaucccug	chr18	+
novel-65-3p	0	1.24939	1.24939	312	guaaaccugaacgaacuuuuuu	aaaaguucauucgggguuuucuggcugauguaaaccugaacgaacuuuuuu	chr14	-
novel-82-3p	0	1.24939	1.24939	313	ucagggcagcucuggccaccc	uuugcuggugcugcccuggcccugggccaggucagggcagcucuggccaccc	chr2	-
novel-63-5p	0	1.17998	1.17998	315	ggggucgcggggguggga	ggggucgcgggggugggaggguggacaaugccaugcuucucucucagugaccccuc	chr8	-
novel-59-3p	1.12097	0	1.12097	316	gaugugaaacccaggccccgac	ccggaggccuuagcucacugcccgcuucuccauguggggaugugaaacccaggccccgac	chr25	+
novel-46-5p	0	1.11057	1.11057	317	ccagcuaggcugagggacu	ccagcuaggcugagggacucacccaucagugucccccggccacugcccgggucauccccauggugccugcgcuggcu	chr1	-
novel-87-3p	0	1.11057	1.11057	318	ucggggucggaggaagguucu	uccuuccucgcccuacccgacccugcagugucauuucaggucggggucggaggaagguucu	chr11	-
novel-25-5p	1.04624	0	1.04624	319	aaccagcuaggcugagggacu	aaccagcuaggcugagggacucacccaucagugucccccggccacugcccgggucauccccauggugccugcgcuggcugg	chr1	-
novel-31-3p	1.04624	0	1.04624	320	aaugauggaggcacacggcuc	agccaugugccuccauccuaggcuuccauccaggcugagacauggccaaugauggaggcacacggcuc	chr19	-

## Sheet: Table S3
Table S3. Predicted target genes of differentially expressed miRNAs.
miRNA Name	Target Gene Name
	Gene ID	Associated Ensembl Gene Name	Bonding Sites Number
Goat-miR-10b	NM_001143805	brain-derived neurotrophic factor	1
Goat-miR-10b	NM_018959	DAZ associated protein 1	1
Goat-miR-10b	NM_018086	fidgetin	1
Goat-miR-10b	NM_198513	PHD finger protein 20-like 1	1
Goat-miR-10b	NM_001077261	nuclear receptor corepressor 2	1
Goat-miR-10b	NM_021072	hyperpolarization activated cyclic nucleotide-gated potassium channel 1	1
Goat-miR-10b	NM_003134	signal recognition particle 14kDa (homologous Alu RNA binding protein)	1
Goat-miR-10b	NM_001015508	purine-rich element binding protein G	1
Goat-miR-10b	NM_003188	mitogen-activated protein kinase kinase kinase 7	1
Goat-miR-10b	NM_015986	cytokine receptor-like factor 3	1
Goat-miR-10b	NM_004439	EPH receptor A5	1
Goat-miR-10b	NM_004423	dishevelled, dsh homolog 3 (Drosophila)	1
Goat-miR-10b	NM_001145097	SKI-like oncogene	1
Goat-miR-10b	NM_004762	cytohesin 1	1
Goat-miR-10b	NM_001130528	sperm associated antigen 9	1
Goat-miR-10b	NM_001722	polymerase (RNA) III (DNA directed) polypeptide D, 44kDa	1
Goat-miR-10b	NM_001134476	leucine rich repeat containing 8 family, member B	1
Goat-miR-10b	NM_152470	ring finger protein 165	1
Goat-miR-10b	NM_001079809	transmembrane protein 183B	1
Goat-miR-10b	NM_138383	metastasis suppressor 1-like	1
Goat-miR-10b	NM_006154	neural precursor cell expressed, developmentally down-regulated 4	1
Goat-miR-10b	NM_001001928	peroxisome proliferator-activated receptor alpha	1
Goat-miR-10b	NM_013231	fibronectin leucine rich transmembrane protein 2	1
Goat-miR-10b	NM_138391	transmembrane protein 183A	1
Goat-miR-10b	NM_032148	solute carrier family 41, member 2	1
Goat-miR-10b	NM_004860	fragile X mental retardation, autosomal homolog 2	1
Goat-miR-10b	NM_002193	inhibin, beta B	1
Goat-miR-10b	NM_001008701	latrophilin 1	1
Goat-miR-10b	NM_017759	INO80 complex subunit D	1
Goat-miR-10b	NM_014818	tripartite motif containing 66	1
Goat-miR-10b	NM_019008	Smith-Magenis syndrome chromosome region, candidate 7-like	1
Goat-miR-10b	NM_006321	ariadne homolog 2 (Drosophila)	1
Goat-miR-10b	NM_014911	AP2 associated kinase 1	1
Goat-miR-10b	NM_001163079	cat eye syndrome chromosome region, candidate 6	1
Goat-miR-10b	NM_020772	nuclear fragile X mental retardation protein interacting protein 2	1
Goat-miR-10b	NM_001136265	intermediate filament family orphan 2	1
Goat-miR-10b	NM_002501	nuclear factor I/X (CCAAT-binding transcription factor)	1
Goat-miR-10b	NM_001142546	leucine zipper protein 1	1
Goat-miR-10b	NM_001170701	muscleblind-like 3 (Drosophila)	1
Goat-miR-146a	NM_002524	neuroblastoma RAS viral (v-ras) oncogene homolog	1
Goat-miR-146a	NM_001025242	interleukin-1 receptor-associated kinase 1	2
Goat-miR-146a	NM_033067	DMRT-like family B with proline-rich C-terminal, 1	1
Goat-miR-146a	NM_004525	low density lipoprotein receptor-related protein 2	1
Goat-miR-146a	NM_001006622	WD repeat domain 33	1
Goat-miR-146a	NM_001146039	golgin, RAB6-interacting	1
Goat-miR-146a	NM_001171137	spermatid perinuclear RNA binding protein	1
Goat-miR-146a	NM_080656	CDKN2A interacting protein N-terminal like	1
Goat-miR-146a	NM_002515	neuro-oncological ventral antigen 1	2
Goat-miR-146a	NM_199423	WW domain containing E3 ubiquitin protein ligase 2	1
Goat-miR-146a	NM_001130720	adenosylhomocysteinase-like 2	1
Goat-miR-146a	NM_130809	proline-rich coiled-coil 1	1
Goat-miR-146a	NM_021946	BCL6 corepressor-like 1	1
Goat-miR-146a	NM_005359	SMAD family member 4	1
Goat-miR-146a	NM_001003810	heterogeneous nuclear ribonucleoprotein D (AU-rich element RNA binding protein 1, 37kDa)	1
Goat-miR-146a	NM_001040167	LFNG O-fucosylpeptide 3-beta-N-acetylglucosaminyltransferase	1
Goat-miR-146a	NM_015397	DDB1 and CUL4 associated factor 12	1
Goat-miR-146a	NM_001142391	solute carrier family 10 (sodium/bile acid cotransporter family), member 3	1
Goat-miR-146a	NM_001170765	ligand dependent nuclear receptor corepressor	1
Goat-miR-146a	NM_003709	Kruppel-like factor 7 (ubiquitous)	1
Goat-miR-146a	NM_004537	nucleosome assembly protein 1-like 1	1
Goat-miR-146a	NM_001081976	adenosine A3 receptor	1
Goat-miR-146a	NM_017617	notch 1	1
Goat-miR-146a	NM_001201366	dynein, axonemal, light chain 1	1
Goat-miR-146a	NM_001195518	mitochondrial calcium uptake 1	1
Goat-miR-146a	NM_001042559	eukaryotic translation initiation factor 4 gamma, 2	1
Goat-miR-146a	NM_001142603	KIAA0141	1
Goat-miR-146a	NM_003162	striatin, calmodulin binding protein	1
Goat-miR-146a	NM_001005743	numb homolog (Drosophila)	1
Goat-miR-146a	NM_001161572	v-maf musculoaponeurotic fibrosarcoma oncogene homolog F (avian)	1
Goat-miR-146a	NM_001135057	leucine rich repeat containing 15	1
Goat-miR-146a	NM_024884	L-2-hydroxyglutarate dehydrogenase	1
Goat-miR-146a	NM_020728	extended synaptotagmin-like protein 2	1
Goat-miR-146a	NM_000555	doublecortin	2
Goat-miR-146a	NM_004235	Kruppel-like factor 4 (gut)	1
Goat-miR-146a	NM_153695	zinc finger protein 367	1
Goat-miR-146a	NM_018403	DCP1 decapping enzyme homolog A (S. cerevisiae)	1
Goat-miR-146a	NM_002587	protocadherin 1	1
Goat-miR-146a	NM_006537	ubiquitin specific peptidase 3	1
Goat-miR-146a	NM_001136000	v-abl Abelson murine leukemia viral oncogene homolog 2	1
Goat-miR-146a	NM_012100	aspartyl aminopeptidase	1
Goat-miR-146a	NM_006703	nudix (nucleoside diphosphate linked moiety X)-type motif 3	1
Goat-miR-146a	NM_001202470	RPS10-NUDT3 readthrough	1
Goat-miR-146a	NM_052862	RCSD domain containing 1	1
Goat-miR-146a	NM_021964	zinc finger protein 148	1
Goat-miR-146a	NM_001079872	cullin 4B	1
Goat-miR-146a	NM_000514	glial cell derived neurotrophic factor	1
Goat-miR-146a	NM_001142468	chromosome 6 open reading frame 203	1
Goat-miR-146a	NM_198504	progestin and adipoQ receptor family member IX	1
Goat-miR-146a	NM_003155	stanniocalcin 1	1
Goat-miR-146a	NM_001049	somatostatin receptor 1	1
Goat-miR-146a	NM_005400	protein kinase C, epsilon	1
Goat-miR-146a	NM_003188	mitogen-activated protein kinase kinase kinase 7	1
Goat-miR-146a	NM_018048	mago-nashi homolog B (Drosophila)	1
Goat-miR-146a	NM_194313	kinesin family member 24	1
Goat-miR-146a	NM_080743	serine/arginine-rich splicing factor 12	1
Goat-miR-146a	NM_024949	WW and C2 domain containing 2	1
Goat-miR-146a	NM_203434	immediate early response 5-like	1
Goat-miR-146a	NM_001126054	calcium/calmodulin-dependent serine protein kinase (MAGUK family)	1
Goat-miR-146a	NM_001178032	zinc finger, C4H2 domain containing	1
Goat-miR-146a	NM_172069	pleckstrin homology domain containing, family H (with MyTH4 domain) member 2	1
Goat-miR-146a	NM_003026	SH3-domain GRB2-like 2	1
Goat-miR-146a	NM_138554	toll-like receptor 4	1
Goat-miR-146a	NM_001145845	roundabout, axon guidance receptor, homolog 1 (Drosophila)	1
Goat-miR-146a	NM_001160423	insulin-like growth factor 2 mRNA binding protein 1	1
Goat-miR-146a	NM_018181	zinc finger protein 532	1
Goat-miR-146a	NM_003505	frizzled family receptor 1	1
Goat-miR-146a	NM_014706	squamous cell carcinoma antigen recognized by T cells 3	1
Goat-miR-146a	NM_001077484	solute carrier family 38, member 1	1
Goat-miR-146a	NM_001205228	sortilin 1	1
Goat-miR-146a	NM_015975	TAF9B RNA polymerase II, TATA box binding protein (TBP)-associated factor, 31kDa	1
Goat-miR-146a	NM_175921	chromosome 5 open reading frame 51	1
Goat-miR-146a	NM_007190	SEC23 interacting protein	1
Goat-miR-146a	NM_019589	YLP motif containing 1	1
Goat-miR-146a	NM_017551	glutamate receptor, ionotropic, delta 1	1
Goat-miR-146a	NM_012096	adaptor protein, phosphotyrosine interaction, PH domain and leucine zipper containing 1	1
Goat-miR-146a	NM_003924	paired-like homeobox 2b	1
Goat-miR-146a	NM_002853	RAD1 homolog (S. pombe)	1
Goat-miR-146a	NM_004709	chromosome X open reading frame 1	1
Goat-miR-146a	NM_005275	guanine nucleotide binding protein-like 1	1
Goat-miR-146a	NM_002501	nuclear factor I/X (CCAAT-binding transcription factor)	1
Goat-miR-146a	NM_001206998	zinc and ring finger 3	1
Goat-miR-146a	NM_003601	SWI/SNF related, matrix associated, actin dependent regulator of chromatin, subfamily a, member 5	1
Goat-miR-146a	NM_000843	glutamate receptor, metabotropic 6	1
Goat-miR-146a	NM_004774	mediator complex subunit 1	2
Goat-miR-146a	NM_001042632	sorting nexin family member 21	1
Goat-miR-146a	NM_001003682	transmembrane protein 200B	1
Goat-miR-146a	NM_015564	leucine rich repeat transmembrane neuronal 2	1
Goat-miR-146a	NM_001007024	golgi SNAP receptor complex member 1	1
Goat-miR-146a	NM_001080416	v-myb myeloblastosis viral oncogene homolog (avian)-like 1	1
Goat-miR-146a	NM_014437	solute carrier family 39 (zinc transporter), member 1	1
Goat-miR-146a	NM_018992	potassium channel tetramerisation domain containing 5	1
Goat-miR-146a	NM_004412	tRNA aspartic acid methyltransferase 1	1
Goat-miR-146a	NM_015447	calmodulin regulated spectrin-associated protein 1	1
Goat-miR-146a	NM_025185	tetratricopeptide repeat, ankyrin repeat and coiled-coil containing 2	1
Goat-miR-146a	NM_000908	natriuretic peptide receptor C/guanylate cyclase C (atrionatriuretic peptide receptor C)	1
Goat-miR-146a	NM_001042371	phosphoglycolate phosphatase	1
Goat-miR-146a	NM_020440	prostaglandin F2 receptor negative regulator	1
Goat-miR-146a	NM_080621	sterile alpha motif domain containing 10	1
Goat-miR-146a	NM_001134296	adaptor-related protein complex 3, mu 2 subunit	1
Goat-miR-146a	NM_021959	protein phosphatase 1, regulatory (inhibitor) subunit 11	1
Goat-miR-146a	NM_000268	neurofibromin 2 (merlin)	1
Goat-miR-146a	NM_001048201	ubiquitin-like with PHD and ring finger domains 1	1
Goat-miR-146a	NM_001127395	methyltransferase like 21A	1
Goat-miR-146a	NM_017766	castor zinc finger 1	1
Goat-miR-146a	NM_001204416	regulator of G-protein signaling 6	1
Goat-miR-146a	NM_001112	adenosine deaminase, RNA-specific, B1	1
Goat-miR-146a	NM_001136115	F-box protein 28	1
Goat-miR-146a	NM_005440	Rho family GTPase 2	1
Goat-miR-146a	NM_000259	myosin VA (heavy chain 12, myoxin)	1
Goat-miR-146a	NM_014686	KIAA0355	1
Goat-miR-146a	NM_005191	CD80 molecule	1
Goat-miR-146a	NM_194286	serine/arginine repetitive matrix 4	1
Goat-miR-146a	NM_020713	zinc finger protein 512B	1
Goat-miR-146a	NM_197956	nuclear apoptosis inducing factor 1	1
Goat-miR-146a	NM_001198625	runt-related transcription factor 1; translocated to, 1 (cyclin D-related)	1
Goat-miR-146a	NM_003372	von Hippel-Lindau binding protein 1	1
Goat-miR-146a	NM_000168	GLI family zinc finger 3	1
Goat-miR-146a	NM_021260	zinc finger, FYVE domain containing 1	1
Goat-miR-146a	NM_006763	BTG family, member 2	1
Goat-miR-146a	NM_000264	patched 1	1
Goat-miR-146a	NM_080677	dynein, light chain, LC8-type 2	1
Goat-miR-146a	NM_022893	B-cell CLL/lymphoma 11A (zinc finger protein)	1
Goat-miR-146a	NM_153690	family with sequence similarity 43, member A	1
Goat-miR-146a	NM_001079559	heterogeneous nuclear ribonucleoprotein U-like 2	1
Goat-miR-146a	NM_006062	SMYD family member 5	1
Goat-miR-146a	NM_001207011	ciliary neurotrophic factor receptor	1
Goat-miR-146a	NM_001202543	cut-like homeobox 1	1
Goat-miR-146a	NM_138795	ADP-ribosylation factor-like 8A	1
Goat-miR-146a	NM_001197297	GA binding protein transcription factor, alpha subunit 60kDa	1
Goat-miR-146a	NM_175061	JAZF zinc finger 1	1
Goat-miR-146a	NM_001005366	lysine (K)-specific demethylase 2B	1
Goat-miR-146a	NM_024577	SH3 domain and tetratricopeptide repeats 2	1
Goat-miR-146a	NM_001164407	TLC domain containing 2	1
Goat-miR-146a	NM_005188	Cas-Br-M (murine) ecotropic retroviral transforming sequence	1
Goat-miR-146a	NM_015562	UBX domain protein 7	1
Goat-miR-146a	NM_001080744	diacylglycerol kinase, gamma 90kDa	1
Goat-miR-146a	NM_001717	basonuclin 1	1
Goat-miR-146a	NM_002586	pre-B-cell leukemia homeobox 2	1
Goat-miR-146a	NM_014431	KIAA1274	1
Goat-miR-146a	NM_001100117	regulating synaptic membrane exocytosis 2	1
Goat-miR-146a	NM_004535	myelin transcription factor 1	1
Goat-miR-146a	NM_001008397	glutathione peroxidase 8 (putative)	1
Goat-miR-146a	NM_012316	karyopherin alpha 6 (importin alpha 7)	1
Goat-miR-146a	NM_001185009	ring finger protein 4	1
Goat-miR-146a	NM_001080470	zinc finger protein 697	1
Goat-miR-146a	NM_001043318	chromosome 14 open reading frame 43	1
Goat-miR-146a	NM_005941	matrix metallopeptidase 16 (membrane-inserted)	1
Goat-miR-146a	NM_033550	TP53 regulating kinase	1
Goat-miR-146a	NM_012166	F-box protein 10	1
Goat-miR-146a	NM_152433	kelch repeat and BTB (POZ) domain containing 3	1
Goat-miR-146a	NM_001164479	chromosome 5 open reading frame 63	1
Goat-miR-146a	NM_015030	FRY-like	1
Goat-miR-146a	NM_138350	THAP domain containing, apoptosis associated protein 3	1
Goat-miR-146a	NM_022455	nuclear receptor binding SET domain protein 1	1
Goat-miR-146a	NM_001184749	SLIT and NTRK-like family, member 4	1
Goat-miR-146a	NM_006139	CD28 molecule	1
Goat-miR-146a	NM_005436	coiled-coil domain containing 6	1
Goat-miR-146a	NM_001145365	zinc finger protein 652	1
Goat-miR-146a	NM_014722	family with sequence similarity 65, member B	1
Goat-miR-146a	NM_001419	ELAV (embryonic lethal, abnormal vision, Drosophila)-like 1 (Hu antigen R)	1
Goat-miR-146a	NM_001830	chloride channel 4	1
Goat-miR-146a	NM_001034914	Kv channel interacting protein 3, calsenilin	1
Goat-miR-146a	NM_001123066	microtubule-associated protein tau	1
Goat-miR-146a	NM_014926	SLIT and NTRK-like family, member 3	1
Goat-miR-146a	NM_017944	ubiquitin specific peptidase 47	1
Goat-miR-146a	NM_001134375	cyclin J	1
Goat-miR-146a	NM_005668	ST8 alpha-N-acetyl-neuraminide alpha-2,8-sialyltransferase 4	1
Goat-miR-146a	NM_001167	X-linked inhibitor of apoptosis	1
Goat-miR-146a	NM_000813	gamma-aminobutyric acid (GABA) A receptor, beta 2	1
Goat-miR-146a	NM_001098477	G-rich RNA sequence binding factor 1	1
Goat-miR-146a	NM_021003	protein phosphatase, Mg2+/Mn2+ dependent, 1A	1
Goat-miR-146a	NM_001135805	synaptotagmin I	1
Goat-miR-146a	NM_001184879	CD84 molecule	1
Goat-miR-146a	NM_001206615	ets homologous factor	1
Goat-miR-146a	NM_001198670	transmembrane protein 136	1
Goat-miR-146a	NM_032932	RAB11 family interacting protein 4 (class II)	1
Goat-miR-146a	NM_001145357	SIN3 homolog A, transcription regulator (yeast)	1
Goat-miR-146a	NM_006965	zinc finger protein 24	1
Goat-miR-146a	NM_001455	forkhead box O3	1
Goat-miR-146a	NM_003482	myeloid/lymphoid or mixed-lineage leukemia 2	1
Goat-miR-146a	NM_003872	neuropilin 2	1
Goat-miR-146a	NM_001025077	CUGBP, Elav-like family member 2	1
Goat-miR-146a	NM_015094	hypermethylated in cancer 2	1
Goat-miR-146a	NM_013272	solute carrier organic anion transporter family, member 3A1	1
Goat-miR-146a	NM_020772	nuclear fragile X mental retardation protein interacting protein 2	1
Goat-miR-146a	NM_001136557	G protein-coupled receptor 107	1
Goat-miR-146a	NM_178864	neuronal PAS domain protein 4	1
Goat-miR-146a	NM_004999	myosin VI	1
Goat-miR-146a	NM_001136031	ATG7 autophagy related 7 homolog (S. cerevisiae)	1
Goat-miR-146a	NM_019106	septin 3	1
Goat-miR-146a	NM_006940	SRY (sex determining region Y)-box 5	1
Goat-miR-146a	NM_006775	quaking homolog, KH domain RNA binding (mouse)	1
Goat-miR-146a	NM_022344	chromosome 17 open reading frame 75	1
Goat-miR-146a	NM_001159547	BEN domain containing 4	1
Goat-miR-146a	NM_001136265	intermediate filament family orphan 2	1
Goat-miR-146a	NM_006572	guanine nucleotide binding protein (G protein), alpha 13	1
Goat-miR-146a	NM_001080424	lysine (K)-specific demethylase 6B	1
Goat-miR-146a	NM_000115	endothelin receptor type B	1
Goat-miR-146a	NM_001201404	WAS protein family, member 2	1
Goat-miR-146a	NM_001040151	sodium channel, voltage-gated, type III, beta	1
Goat-miR-146a	NM_024674	lin-28 homolog A (C. elegans)	1
Goat-miR-146a	NM_020390	eukaryotic translation initiation factor 5A2	1
Goat-miR-211	NM_032581	family with sequence similarity 126, member A	4
Goat-miR-211	NM_001130058	solute carrier family 44, member 5	2
Goat-miR-211	NM_032047	UDP-GlcNAc:betaGal beta-1,3-N-acetylglucosaminyltransferase 5	1
Goat-miR-211	NM_003916	adaptor-related protein complex 1, sigma 2 subunit	2
Goat-miR-211	NM_001170331	LanC lantibiotic synthetase component C-like 3 (bacterial)	1
Goat-miR-211	NM_001015051	runt-related transcription factor 2	1
Goat-miR-211	NM_001184938	erythrocyte membrane protein band 4.1 like 5	1
Goat-miR-211	NM_001003407	actin binding LIM protein 1	1
Goat-miR-211	NM_014990	Ral GTPase activating protein, alpha subunit 1 (catalytic)	1
Goat-miR-211	NM_016938	EGF containing fibulin-like extracellular matrix protein 2	2
Goat-miR-211	NM_014631	SH3 and PX domains 2A	2
Goat-miR-211	NM_001884	hyaluronan and proteoglycan link protein 1	1
Goat-miR-211	NM_001214906	zinc finger protein 48	1
Goat-miR-211	NM_018325	chromosome 9 open reading frame 72	2
Goat-miR-211	NM_001134456	family with sequence similarity 55, member C	1
Goat-miR-211	NM_001080417	zinc finger protein 629	1
Goat-miR-211	NM_001040712	protein tyrosine phosphatase, receptor type, D	1
Goat-miR-211	NM_004439	EPH receptor A5	1
Goat-miR-211	NM_014822	SEC24 family, member D (S. cerevisiae)	1
Goat-miR-211	NM_001190259	germinal center expressed transcript 2	1
Goat-miR-211	NM_005766	FERM, RhoGEF (ARHGEF) and pleckstrin domain protein 1 (chondrocyte-derived)	1
Goat-miR-211	NM_003205	transcription factor 12	1
Goat-miR-211	NM_020655	junctophilin 3	1
Goat-miR-211	NM_001163334	synaptotagmin-like 5	1
Goat-miR-211	NM_016131	RAB10, member RAS oncogene family	1
Goat-miR-211	NM_001100818	phosphotyrosine interaction domain containing 1	1
Goat-miR-211	NM_001242628	glucose-fructose oxidoreductase domain containing 1	1
Goat-miR-211	NM_000838	glutamate receptor, metabotropic 1	1
Goat-miR-211	NM_004280	eukaryotic translation elongation factor 1 epsilon 1	1
Goat-miR-211	NM_017637	basonuclin 2	1
Goat-miR-211	NM_003559	phosphatidylinositol-5-phosphate 4-kinase, type II, beta	1
Goat-miR-211	NM_000386	bleomycin hydrolase	1
Goat-miR-211	NM_001126060	nitric oxide synthase 1 (neuronal) adaptor protein	2
Goat-miR-211	NM_001135155	D4, zinc and double PHD fingers family 1	1
Goat-miR-211	NM_014547	tropomodulin 3 (ubiquitous)	2
Goat-miR-211	NM_133448	transmembrane protein 132D	1
Goat-miR-211	NM_001130721	ELOVL fatty acid elongase 6	1
Goat-miR-211	NM_020382	SET domain containing (lysine methyltransferase) 8	1
Goat-miR-211	NM_030759	nuclear receptor binding factor 2	1
Goat-miR-211	NM_001130710	LSM5 homolog, U6 small nuclear RNA associated (S. cerevisiae)	1
Goat-miR-211	NM_001042604	5'-3' exoribonuclease 1	1
Goat-miR-211	NM_000876	insulin-like growth factor 2 receptor	1
Goat-miR-211	NM_000950	proline rich Gla (G-carboxyglutamic acid) 1	1
Goat-miR-211	NM_003108	SRY (sex determining region Y)-box 11	3
Goat-miR-211	NM_022818	microtubule-associated protein 1 light chain 3 beta	1
Goat-miR-211	NM_000337	sarcoglycan, delta (35kDa dystrophin-associated glycoprotein)	1
Goat-miR-211	NM_017759	INO80 complex subunit D	1
Goat-miR-211	NM_014832	TBC1 domain family, member 4	1
Goat-miR-211	NM_001018111	podocalyxin-like	1
Goat-miR-211	NM_002271	importin 5	1
Goat-miR-211	NM_007224	neurexophilin 4	1
Goat-miR-211	NM_015270	adenylate cyclase 6	2
Goat-miR-211	NM_001100399	PDS5, regulator of cohesion maintenance, homolog A (S. cerevisiae)	1
Goat-miR-211	NM_012095	adaptor-related protein complex 3, mu 1 subunit	1
Goat-miR-211	NM_001221	calcium/calmodulin-dependent protein kinase II delta	1
Goat-miR-211	NM_022477	NDRG family member 3	1
Goat-miR-211	NM_005633	son of sevenless homolog 1 (Drosophila)	1
Goat-miR-211	NM_021183	RAP2C, member of RAS oncogene family	2
Goat-miR-211	NM_001042494	solute carrier family 12 (potassium/chloride transporters), member 6	1
Goat-miR-211	NM_001031740	mannosidase, endo-alpha-like	1
Goat-miR-211	NM_001100398	RAP1 GTPase activating protein 2	1
Goat-miR-211	NM_004238	thyroid hormone receptor interactor 12	1
Goat-miR-211	NM_020925	cache domain containing 1	1
Goat-miR-211	NM_001008781	FAT tumor suppressor homolog 3 (Drosophila)	1
Goat-miR-211	NM_001217	carbonic anhydrase XI	1
Goat-miR-211	NM_015026	MON2 homolog (S. cerevisiae)	1
Goat-miR-211	NM_014611	MDN1, midasin homolog (yeast)	1
Goat-miR-211	NM_015695	bromodomain and PHD finger containing, 3	1
Goat-miR-211	NM_001407	cadherin, EGF LAG seven-pass G-type receptor 3 (flamingo homolog, Drosophila)	2
Goat-miR-211	NM_001013415	F-box and WD repeat domain containing 7	1
Goat-miR-211	NM_032785	ATP/GTP binding protein-like 4	1
Goat-miR-211	NM_001204144	histone deacetylase 9	1
Goat-miR-211	NM_001135733	tumor protein p53 inducible nuclear protein 1	1
Goat-miR-211	NM_020725	ataxin 7-like 1	1
Goat-miR-211	NM_001197051	zinc finger protein 91 homolog (mouse)	1
Goat-miR-211	NM_015278	SAM and SH3 domain containing 1	1
Goat-miR-211	NM_030661	homeobox A3	1
Goat-miR-211	NM_001011700	mitochondrial coiled-coil domain 1	1
Goat-miR-211	NM_001396	dual-specificity tyrosine-(Y)-phosphorylation regulated kinase 1A	2
Goat-miR-211	NM_003036	v-ski sarcoma viral oncogene homolog (avian)	2
Goat-miR-211	NM_153634	copine VIII	1
Goat-miR-211	NM_001142548	RAD54-like (S. cerevisiae)	1
Goat-miR-211	NM_001145845	roundabout, axon guidance receptor, homolog 1 (Drosophila)	1
Goat-miR-211	NM_001083962	transcription factor 4	2
Goat-miR-211	NM_004888	ATPase, H+ transporting, lysosomal 13kDa, V1 subunit G1	1
Goat-miR-211	NM_004972	Janus kinase 2	1
Goat-miR-211	NM_001008495	transmembrane protein 64	1
Goat-miR-211	NM_001142466	glutamic pyruvate transaminase (alanine aminotransferase) 2	1
Goat-miR-211	NM_017944	ubiquitin specific peptidase 47	1
Goat-miR-211	NM_018227	ubiquitin-like modifier activating enzyme 6	1
Goat-miR-211	NM_006089	sex comb on midleg-like 2 (Drosophila)	1
Goat-miR-211	NM_001164386	Rap guanine nucleotide exchange factor (GEF) 6	1
Goat-miR-211	NM_000663	4-aminobutyrate aminotransferase	1
Goat-miR-211	NM_001013647	hypothetical LOC646851	1
Goat-miR-211	NM_000961	prostaglandin I2 (prostacyclin) synthase	1
Goat-miR-211	NM_006874	E74-like factor 2 (ets domain transcription factor)	1
Goat-miR-211	NM_001184749	SLIT and NTRK-like family, member 4	1
Goat-miR-211	NM_005026	phosphoinositide-3-kinase, catalytic, delta polypeptide	1
Goat-miR-211	NM_001130916	transforming growth factor, beta receptor 1	1
Goat-miR-211	NM_001083625	ankyrin repeat domain 12	1
Goat-miR-211	NM_022340	zinc finger, FYVE domain containing 20	1
Goat-miR-211	NM_001144877	suppressor of cancer cell invasion	1
Goat-miR-211	NM_001001669	Rho guanine nucleotide exchange factor (GEF) 37	1
Goat-miR-211	NM_018304	proline rich 11	1
Goat-miR-211	NM_012430	SEC22 vesicle trafficking protein homolog A (S. cerevisiae)	1
Goat-miR-211	NM_001695	ATPase, H+ transporting, lysosomal 42kDa, V1 subunit C1	1
Goat-miR-211	NM_001080779	myosin IC	1
Goat-miR-211	NM_018403	DCP1 decapping enzyme homolog A (S. cerevisiae)	1
Goat-miR-211	NM_002745	mitogen-activated protein kinase 1	1
Goat-miR-211	NM_030773	tubulin, beta 1	1
Goat-miR-211	NM_001199775	carboxypeptidase D	1
Goat-miR-211	NM_001135825	ring finger protein 185	1
Goat-miR-211	NM_015215	calmodulin binding transcription activator 1	1
Goat-miR-211	NM_170744	unc-5 homolog B (C. elegans)	1
Goat-miR-211	NM_000555	doublecortin	2
Goat-miR-211	NM_024989	post-GPI attachment to proteins 1	1
Goat-miR-211	NM_015020	PH domain and leucine rich repeat protein phosphatase 2	1
Goat-miR-211	NM_003873	neuropilin 1	1
Goat-miR-211	NM_015144	zinc finger, CCHC domain containing 14	1
Goat-miR-211	NM_003221	transcription factor AP-2 beta (activating enhancer binding protein 2 beta)	1
Goat-miR-211	NM_001170765	ligand dependent nuclear receptor corepressor	1
Goat-miR-211	NM_014803	zinc finger protein 518A	1
Goat-miR-211	NM_020760	HECT, C2 and WW domain containing E3 ubiquitin protein ligase 2	1
Goat-miR-211	NM_001005404	yippee-like 2 (Drosophila)	1
Goat-miR-30a	NM_207318	family with sequence similarity 199, X-linked	2
Goat-miR-30a	NM_005664	makorin ring finger protein 3	3
Goat-miR-30a	NM_014790	janus kinase and microtubule interacting protein 2	1
Goat-miR-30a	NM_032268	zinc and ring finger 1	2
Goat-miR-30a	NM_015361	R3H domain containing 1	1
Goat-miR-30a	NM_001031684	serine/arginine-rich splicing factor 7	1
Goat-miR-30a	NM_001135036	family with sequence similarity 18, member B2	1
Goat-miR-30a	NM_194247	heterogeneous nuclear ribonucleoprotein A3	1
Goat-miR-30a	NM_001104586	amyotrophic lateral sclerosis 2 (juvenile) chromosome region, candidate 8	1
Goat-miR-30a	NM_016021	ubiquitin-conjugating enzyme E2, J1, U	1
Goat-miR-30a	NM_001042494	solute carrier family 12 (potassium/chloride transporters), member 6	2
Goat-miR-30a	NM_198721	collagen, type XXV, alpha 1	1
Goat-miR-30a	NM_017416	interleukin 1 receptor accessory protein-like 2	1
Goat-miR-30a	NM_017421	coenzyme Q3 homolog, methyltransferase (S. cerevisiae)	1
Goat-miR-30a	NM_033274	ADAM metallopeptidase domain 19	1
Goat-miR-30a	NM_001270	chromodomain helicase DNA binding protein 1	2
Goat-miR-30a	NM_018115	SDA1 domain containing 1	1
Goat-miR-30a	NM_020747	zinc finger protein 608	1
Goat-miR-30a	NM_016078	family with sequence similarity 18, member B1	1
Goat-miR-30a	NM_001172774	dpy-19-like 3 (C. elegans)	1
Goat-miR-30a	NM_014415	zinc finger and BTB domain containing 11	1
Goat-miR-30a	NM_006626	zinc finger and BTB domain containing 6	1
Goat-miR-30a	NM_013233	serine threonine kinase 39	1
Goat-miR-30a	NM_173569	ubinuclein 2	2
Goat-miR-30a	NM_004460	fibroblast activation protein, alpha	1
Goat-miR-30a	NM_001166252	lipid phosphate phosphatase-related protein type 4	1
Goat-miR-30a	NM_004555	nuclear factor of activated T-cells, cytoplasmic, calcineurin-dependent 3	2
Goat-miR-30a	NM_000170	glycine dehydrogenase (decarboxylating)	1
Goat-miR-30a	NM_153252	bromodomain and WD repeat domain containing 3	3
Goat-miR-30a	NM_006716	DBF4 homolog (S. cerevisiae)	1
Goat-miR-30a	NM_173833	scavenger receptor class A, member 5 (putative)	2
Goat-miR-30a	NM_001482	glycine amidinotransferase (L-arginine:glycine amidinotransferase)	1
Goat-miR-30a	NM_001031692	leucine rich repeat containing 17	1
Goat-miR-30a	NM_002077	golgin A1	1
Goat-miR-30a	NM_005985	snail homolog 1 (Drosophila)	1
Goat-miR-30a	NM_001080477	odz, odd Oz/ten-m homolog 3 (Drosophila)	1
Goat-miR-30a	NM_014043	chromatin modifying protein 2B	1
Goat-miR-30a	NM_152455	zinc finger and SCAN domain containing 29	1
Goat-miR-30a	NM_032236	ubiquitin specific peptidase 48	1
Goat-miR-30a	NM_019074	delta-like 4 (Drosophila)	1
Goat-miR-30a	NM_001130103	collagen, type XIII, alpha 1	1
Goat-miR-30a	NM_017780	chromodomain helicase DNA binding protein 7	2
Goat-miR-30a	NM_014729	thymocyte selection-associated high mobility group box	1
Goat-miR-30a	NM_012287	ArfGAP with coiled-coil, ankyrin repeat and PH domains 2	3
Goat-miR-30a	NM_014938	MLX interacting protein	2
Goat-miR-30a	NM_001042371	phosphoglycolate phosphatase	1
Goat-miR-30a	NM_001080480	membrane bound O-acyltransferase domain containing 1	1
Goat-miR-30a	NM_001040100	chromosome 3 open reading frame 57	1
Goat-miR-30a	NM_005475	SH2B adaptor protein 3	2
Goat-miR-30a	NM_003745	suppressor of cytokine signaling 1	1
Goat-miR-30a	NM_024936	zinc finger, CCHC domain containing 4	1
Goat-miR-30a	NM_000681	adrenergic, alpha-2A-, receptor	2
Goat-miR-30a	NM_019058	DNA-damage-inducible transcript 4	1
Goat-miR-30a	NM_001159675	synaptotagmin binding, cytoplasmic RNA interacting protein	1
Goat-miR-30a	NM_001221	calcium/calmodulin-dependent protein kinase II delta	1
Goat-miR-30a	NM_003647	diacylglycerol kinase, epsilon 64kDa	1
Goat-miR-30a	NM_016620	zinc finger protein 644	1
Goat-miR-30a	NM_018429	B double prime 1, subunit of RNA polymerase III transcription initiation factor IIIB	1
Goat-miR-30a	NM_032970	SEC22 vesicle trafficking protein homolog C (S. cerevisiae)	1
Goat-miR-30a	NM_001002257	lysocardiolipin acyltransferase 1	1
Goat-miR-30a	NM_004973	jumonji, AT rich interactive domain 2	1
Goat-miR-30a	NM_020737	leucine rich repeat and fibronectin type III domain containing 2	1
Goat-miR-30a	NM_000212	integrin, beta 3 (platelet glycoprotein IIIa, antigen CD61)	1
Goat-miR-30a	NM_016277	RAB23, member RAS oncogene family	1
Goat-miR-30a	NM_001010877	zinc finger protein 311	1
Goat-miR-30a	NM_022841	regulatory factor X, 7	2
Goat-miR-30a	NM_018231	solute carrier family 38, member 7	1
Goat-miR-30a	NM_001008660	phosphatidylinositol binding clathrin assembly protein	1
Goat-miR-30a	NM_001001132	intersectin 1 (SH3 domain protein)	1
Goat-miR-30a	NM_015429	ABI family, member 3 (NESH) binding protein	1
Goat-miR-30a	NM_015060	AVL9 homolog (S. cerevisiase)	1
Goat-miR-30a	NM_001146688	lysine (K)-specific demethylase 3A	1
Goat-miR-30a	NM_001040158	H2A histone family, member Y	1
Goat-miR-30a	NM_001206	Kruppel-like factor 9	1
Goat-miR-30a	NM_001085400	RELT-like 1	1
Goat-miR-30a	NM_004949	desmocollin 2	1
Goat-miR-30a	NM_001199835	sorting nexin 10	1
Goat-miR-30a	NM_001197115	glutamate-cysteine ligase, catalytic subunit	1
Goat-miR-30a	NM_014974	DIP2 disco-interacting protein 2 homolog C (Drosophila)	1
Goat-miR-30a	NM_003747	tankyrase, TRF1-interacting ankyrin-related ADP-ribose polymerase	1
Goat-miR-30a	NM_003489	nuclear receptor interacting protein 1	2
Goat-miR-30a	NM_152450	family with sequence similarity 81, member A	2
Goat-miR-30a	NM_002943	RAR-related orphan receptor A	4
Goat-miR-30a	NM_014810	centrosomal protein 350kDa	1
Goat-miR-30a	NM_015268	DnaJ (Hsp40) homolog, subfamily C, member 13	1
Goat-miR-30a	NM_002114	human immunodeficiency virus type I enhancer binding protein 1	1
Goat-miR-30a	NM_001135699	tyrosine 3-monooxygenase/tryptophan 5-monooxygenase activation protein, zeta polypeptide	1
Goat-miR-30a	NM_000210	integrin, alpha 6	1
Goat-miR-30a	NM_153271	sorting nexin 33	1
Goat-miR-30a	NM_001099225	coiled-coil domain containing 43	1
Goat-miR-30a	NM_005923	mitogen-activated protein kinase kinase kinase 5	1
Goat-miR-30a	NM_012301	membrane associated guanylate kinase, WW and PDZ domain containing 2	1
Goat-miR-30a	NM_001012994	sorting nexin family member 30	1
Goat-miR-30a	NM_005725	tetraspanin 2	1
Goat-miR-30a	NM_001136225	REST corepressor 3	1
Goat-miR-30a	NM_001170701	muscleblind-like 3 (Drosophila)	2
Goat-miR-30a	NM_001190737	nuclear factor I/B	3
Goat-miR-30a	NM_003350	ubiquitin-conjugating enzyme E2 variant 2	1
Goat-miR-30a	NM_006407	ADP-ribosylation-like factor 6 interacting protein 5	1
Goat-miR-30a	NM_017420	SIX homeobox 4	1
Goat-miR-30a	NM_145313	RasGEF domain family, member 1A	1
Goat-miR-30a	NM_022048	casein kinase 1, gamma 1	1
Goat-miR-30a	NM_012307	erythrocyte membrane protein band 4.1-like 3	1
Goat-miR-30a	NM_147190	ceramide synthase 5	1
Goat-miR-30a	NM_005686	SRY (sex determining region Y)-box 13	1
Goat-miR-30a	NM_177551	hydroxycarboxylic acid receptor 2	1
Goat-miR-30a	NM_006018	hydroxycarboxylic acid receptor 3	1
Goat-miR-30a	NM_002013	FK506 binding protein 3, 25kDa	1
Goat-miR-30a	NM_003816	ADAM metallopeptidase domain 9	1
Goat-miR-30a	NM_001717	basonuclin 1	1
Goat-miR-30a	NM_001104647	solute carrier family 25, member 36	1
Goat-miR-30a	NM_080678	ubiquitin-conjugating enzyme E2F (putative)	1
Goat-miR-30a	NM_207356	chromosome 1 open reading frame 174	1
Goat-miR-30a	NM_013309	solute carrier family 30 (zinc transporter), member 4	1
Goat-miR-30a	NM_001145076	echinoderm microtubule associated protein like 4	1
Goat-miR-30a	NM_001195728	solute carrier family 1 (glial high affinity glutamate transporter), member 2	1
Goat-miR-30a	NM_001010942	RAP1B, member of RAS oncogene family	1
Goat-miR-30a	NM_001160364	transmembrane channel-like 7	1
Goat-miR-30a	NM_001039707	serologically defined colon cancer antigen 3	1
Goat-miR-30a	NM_001172713	golgin A4	1
Goat-miR-30a	NM_015285	WD repeat domain 7	1
Goat-miR-30a	NM_001190481	claspin	1
Goat-miR-30a	NM_015225	prune homolog 2 (Drosophila)	1
Goat-miR-30a	NM_014293	neuronal pentraxin receptor	1
Goat-miR-30a	NM_016351	ADAM metallopeptidase domain 22	2
Goat-miR-30a	NM_020336	Ral GTPase activating protein, beta subunit (non-catalytic)	1
Goat-miR-30a	NM_001032221	syntaxin binding protein 1	1
Goat-miR-30a	NM_001017916	cytochrome b-561	1
Goat-miR-30a	NM_198551	melanoma inhibitory activity family, member 3	1
Goat-miR-30a	NM_017709	family with sequence similarity 46, member C	1
Goat-miR-30a	NM_001199022	centriolar coiled coil protein 110kDa	1
Goat-miR-30a	NM_001163278	odz, odd Oz/ten-m homolog 1 (Drosophila)	1
Goat-miR-30a	NM_015562	UBX domain protein 7	1
Goat-miR-30a	NM_005896	isocitrate dehydrogenase 1 (NADP+), soluble	2
Goat-miR-30a	NM_000575	interleukin 1, alpha	1
Goat-miR-30a	NM_001163321	coiled-coil domain containing 120	1
Goat-miR-30a	NM_001004106	G protein-coupled receptor kinase 6	1
Goat-miR-30a	NM_015236	latrophilin 3	1
Goat-miR-30a	NM_015016	microtubule associated serine/threonine kinase 3	1
Goat-miR-30a	NM_001174098	solute carrier family 29 (nucleoside transporters), member 3	1
Goat-miR-30a	NM_152522	ADP-ribosylation-like factor 6 interacting protein 6	1
Goat-miR-30a	NM_024852	eukaryotic translation initiation factor 2C, 3	1
Goat-miR-30a	NM_005761	plexin C1	1
Goat-miR-30a	NM_018700	tripartite motif containing 36	1
Goat-miR-30a	NM_007013	WW domain containing E3 ubiquitin protein ligase 1	1
Goat-miR-30a	NM_001127399	yippee-like 5 (Drosophila)	1
Goat-miR-30a	NM_014203	adaptor-related protein complex 2, alpha 1 subunit	1
Goat-miR-30a	NM_024792	family with sequence similarity 57, member A	1
Goat-miR-30a	NM_001198777	cullin 2	1
Goat-miR-30a	NM_152392	AHA1, activator of heat shock 90kDa protein ATPase homolog 2 (yeast)	1
Goat-miR-30a	NM_014247	Rap guanine nucleotide exchange factor (GEF) 2	1
Goat-miR-30a	NM_144567	angel homolog 2 (Drosophila)	1
Goat-miR-30a	NM_002466	v-myb myeloblastosis viral oncogene homolog (avian)-like 2	1
Goat-miR-30a	NM_018275	chromosome 7 open reading frame 43	2
Goat-miR-30a	NM_022754	sideroflexin 1	1
Goat-miR-30a	NM_004849	ATG5 autophagy related 5 homolog (S. cerevisiae)	1
Goat-miR-30a	NM_000555	doublecortin	1
Goat-miR-30a	NM_001144881	prickle homolog 1 (Drosophila)	1
Goat-miR-30a	NM_019105	tenascin XB	1
Goat-miR-30a	NM_001167674	cell adhesion molecule 2	1
Goat-miR-30a	NM_001466	frizzled family receptor 2	1
Goat-miR-30a	NM_000678	adrenergic, alpha-1D-, receptor	1
Goat-miR-30a	NM_024953	N(alpha)-acetyltransferase 25, NatB auxiliary subunit	1
Goat-miR-30a	NM_004538	nucleosome assembly protein 1-like 3	1
Goat-miR-30a	NM_004575	POU class 4 homeobox 2	1
Goat-miR-30a	NM_001033723	zinc finger protein 704	1
Goat-miR-30a	NM_001135608	Rho GTPase activating protein 26	1
Goat-miR-30a	NM_033259	calcium/calmodulin-dependent protein kinase II inhibitor 2	1
Goat-miR-30a	NM_001199865	kinesin family member 16B	1
Goat-miR-30a	NM_144982	zinc finger, C3H1-type containing	1
Goat-miR-30a	NM_001039948	small G protein signaling modulator 1	1
Goat-miR-30a	NM_012384	glucocorticoid modulatory element binding protein 2	1
Goat-miR-30a	NM_013450	bromodomain adjacent to zinc finger domain, 2B	1
Goat-miR-30a	NM_001098832	family with sequence similarity 104, member A	1
Goat-miR-30a	NM_001220482	Meis homeobox 2	1
Goat-miR-30a	NM_152663	Ral GEF with PH domain and SH3 binding motif 2	1
Goat-miR-30a	NM_016172	UBA domain containing 1	1
Goat-miR-30a	NM_001080529	WAS/WASL interacting protein family, member 3	1
Goat-miR-30a	NM_014978	sortilin-related VPS10 domain containing receptor 3	1
Goat-miR-30a	NM_001168407	regulating synaptic membrane exocytosis 1	1
Goat-miR-30a	NM_004705	protein-kinase, interferon-inducible double stranded RNA dependent inhibitor, repressor of (P58 repressor)	1
Goat-miR-30a	NM_022062	PBX/knotted 1 homeobox 2	1
Goat-miR-30a	NM_003659	alkylglycerone phosphate synthase	1
Goat-miR-30a	NM_138803	coiled-coil domain containing 148	1
Goat-miR-30a	NM_004232	suppressor of cytokine signaling 6	2
Goat-miR-30a	NM_005523	homeobox A11	1
Goat-miR-30a	NM_001025087	CUGBP, Elav-like family member 4	1
Goat-miR-30a	NM_018641	carbohydrate (chondroitin 4) sulfotransferase 12	1
Goat-miR-30a	NM_005388	phosducin-like	1
Goat-miR-30a	NM_001166301	DEAH (Asp-Glu-Ala-His) box polypeptide 40	1
Goat-miR-30a	NM_020925	cache domain containing 1	1
Goat-miR-30a	NM_207577	microtubule-associated protein 6	1
Goat-miR-30a	NM_001042486	discs, large (Drosophila) homolog-associated protein 4	1
Goat-miR-30a	NM_001174087	nuclear receptor coactivator 3	1
Goat-miR-30a	NM_004898	clock homolog (mouse)	1
Goat-miR-30a	NM_000615	neural cell adhesion molecule 1	2
Goat-miR-30a	NM_004414	regulator of calcineurin 1	1
Goat-miR-30a	NM_017754	UHRF1 binding protein 1	1
Goat-miR-30a	NM_014829	DEAD (Asp-Glu-Ala-Asp) box polypeptide 46	1
Goat-miR-30a	NM_003615	solute carrier family 4, sodium bicarbonate cotransporter, member 7	2
Goat-miR-30a	NM_001098813	septin 8	1
Goat-miR-30a	NM_017851	poly (ADP-ribose) polymerase family, member 16	1
Goat-miR-30a	NM_001080521	Ras association (RalGDS/AF-6) domain family (N-terminal) member 10	1
Goat-miR-30a	NM_001080530	sorting nexin 29	2
Goat-miR-30a	NM_181356	suppressor of Ty 3 homolog (S. cerevisiae)	1
Goat-miR-30a	NM_032410	hook homolog 3 (Drosophila)	1
Goat-miR-30a	NM_001127715	syntaxin binding protein 5 (tomosyn)	1
Goat-miR-30a	NM_001037164	ADP-ribosylation factor-like 4A	1
Goat-miR-30a	NM_001011703	family with sequence similarity 125, member B	1
Goat-miR-30a	NM_005633	son of sevenless homolog 1 (Drosophila)	1
Goat-miR-30a	NM_015576	ELKS/RAB6-interacting/CAST family member 2	1
Goat-miR-30a	NM_001001971	family with sequence similarity 13, member C	1
Goat-miR-30a	NM_012216	midline 2	2
Goat-miR-30a	NM_006887	zinc finger protein 36, C3H type-like 2	1
Goat-miR-30a	NM_002508	nidogen 1	1
Goat-miR-30a	NM_000109	dystrophin	1
Goat-miR-30a	NM_001006932	ribosomal protein S6 kinase, 90kDa, polypeptide 2	1
Goat-miR-30a	NM_003247	thrombospondin 2	1
Goat-miR-30a	NM_015156	REST corepressor 1	1
Goat-miR-30a	NM_001005353	adenylate kinase 4	1
Goat-miR-30a	NM_001024666	SH3-domain kinase binding protein 1	1
Goat-miR-30a	NM_001013438	fragile X mental retardation, autosomal homolog 1	1
Goat-miR-30a	NM_012081	elongation factor, RNA polymerase II, 2	2
Goat-miR-30a	NM_014331	solute carrier family 7 (anionic amino acid transporter light chain, xc- system), member 11	2
Goat-miR-30a	NM_015163	tripartite motif containing 9	1
Goat-miR-30a	NM_016626	mex-3 homolog C (C. elegans)	1
Goat-miR-30a	NM_000259	myosin VA (heavy chain 12, myoxin)	1
Goat-miR-30a	NM_001172673	CUGBP, Elav-like family member 5	1
Goat-miR-30a	NM_002886	RAP2B, member of RAS oncogene family	1
Goat-miR-30a	NM_001145319	plastin 1	1
Goat-miR-30a	NM_000719	calcium channel, voltage-dependent, L type, alpha 1C subunit	1
Goat-miR-30a	NM_014803	zinc finger protein 518A	2
Goat-miR-30a	NM_014423	AF4/FMR2 family, member 4	1
Goat-miR-30a	NM_001198999	sema domain, transmembrane domain (TM), and cytoplasmic domain, (semaphorin) 6D	1
Goat-miR-30a	NM_012465	tolloid-like 2	2
Goat-miR-30a	NM_078483	solute carrier family 36 (proton/amino acid symporter), member 1	2
Goat-miR-30a	NM_001174156	sterile alpha motif domain containing 8	2
Goat-miR-30a	NM_001024843	trinucleotide repeat containing 6B	2
Goat-miR-30a	NM_001037293	paralemmin 2	1
Goat-miR-30a	NM_005270	GLI family zinc finger 2	2
Goat-miR-30a	NM_152230	inositol polyphosphate multikinase	2
Goat-miR-30a	NM_017944	ubiquitin specific peptidase 47	1
Goat-miR-30a	NM_004163	RAB27B, member RAS oncogene family	2
Goat-miR-30a	NM_001169117	stromal interaction molecule 2	3
Goat-miR-30a	NM_017637	basonuclin 2	2
Goat-miR-30a	NM_001135733	tumor protein p53 inducible nuclear protein 1	3
Goat-miR-30a	NM_001242312	family with sequence similarity 124A	1
Goat-miR-30a	NM_016120	ring finger protein, LIM domain interacting	2
Goat-miR-30a	NM_005779	lipoma HMGIC fusion partner-like 2	1
Goat-miR-30a	NM_005603	ATPase, aminophospholipid transporter, class I, type 8B, member 1	1
Goat-miR-30a	NM_014873	lysophosphatidylglycerol acyltransferase 1	2
Goat-miR-30a	NM_001098801	chromosome 18 open reading frame 19	1
Goat-miR-30a	NM_001201427	dishevelled associated activator of morphogenesis 2	1
Goat-miR-30a	NM_001131010	SATB homeobox 1	1
Goat-miR-30a	NM_001134445	dimethylarginine dimethylaminohydrolase 1	1
Goat-miR-30a	NM_004841	RAS protein activator like 2	2
Goat-miR-30a	NM_001146335	solute carrier family 6 (neutral amino acid transporter), member 15	1
Goat-miR-30a	NM_007249	Kruppel-like factor 12	1
Goat-miR-30a	NM_021964	zinc finger protein 148	2
Goat-miR-30a	NM_005436	coiled-coil domain containing 6	2
Goat-miR-30a	NM_001166160	protein phosphatase 1, regulatory (inhibitor) subunit 9A	1
Goat-miR-30a	NM_001104631	phosphodiesterase 4D, cAMP-specific	1
Goat-miR-30a	NM_000793	deiodinase, iodothyronine, type II	1
Goat-miR-30a	NM_024947	polyhomeotic homolog 3 (Drosophila)	1
Goat-miR-30a	NM_152758	YTH domain family, member 3	1
Goat-miR-30a	NM_001172173	cysteine-serine-rich nuclear protein 3	1
Goat-miR-30a	NM_001111112	ubiquitin-conjugating enzyme E2K	1
Goat-miR-30a	NM_001115113	WD repeat domain 26	1
Goat-miR-30a	NM_001008493	enabled homolog (Drosophila)	1
Goat-miR-30a	NM_001077484	solute carrier family 38, member 1	1
Goat-miR-30a	NM_002653	paired-like homeodomain 1	1
Goat-miR-30a	NM_001172509	SATB homeobox 2	1
Goat-miR-30a	NM_015878	antizyme inhibitor 1	1
Goat-miR-30a	NM_016116	ankyrin repeat and SOCS box containing 4	1
Goat-miR-30a	NM_001195215	DENN/MADD domain containing 1B	1
Goat-miR-30a	NM_000684	adrenergic, beta-1-, receptor	1
Goat-miR-30a	NM_052906	extracellular leucine-rich repeat and fibronectin type III domain containing 2	1
Goat-miR-30a	NM_001134285	estrogen-related receptor gamma	1
Goat-miR-30a	NM_003947	kalirin, RhoGEF kinase	1
Goat-miR-30a	NM_003107	SRY (sex determining region Y)-box 4	1
Goat-miR-30a	NM_000810	gamma-aminobutyric acid (GABA) A receptor, alpha 5	1
Goat-miR-30a	NM_014903	neuron navigator 3	1
Goat-miR-30a	NM_017934	pleckstrin homology domain interacting protein	1
Goat-miR-30a	NM_013286	RNA binding motif protein 15B	1
Goat-miR-30a	NM_031413	cat eye syndrome chromosome region, candidate 2	2
Goat-miR-30a	NM_004952	ephrin-A3	2
Goat-miR-30a	NM_001031690	family with sequence similarity 131, member B	1
Goat-miR-30a	NM_001077269	WAS/WASL interacting protein family, member 1	1
Goat-miR-30a	NM_153367	zinc finger, CCHC domain containing 24	2
Goat-miR-30a	NM_012199	eukaryotic translation initiation factor 2C, 1	1
Goat-miR-30a	NM_000267	neurofibromin 1	1
Goat-miR-30a	NM_001144952	sidekick homolog 2 (chicken)	1
Goat-miR-30a	NM_030627	cytoplasmic polyadenylation element binding protein 4	1
Goat-miR-30a	NM_001167671	LIM domain containing preferred translocation partner in lipoma	1
Goat-miR-30a	NM_001170803	La ribonucleoprotein domain family, member 4	1
Goat-miR-30a	NM_015083	cyclin-dependent kinase 12	1
Goat-miR-30a	NM_001002838	WNK lysine deficient protein kinase 3	1
Goat-miR-30a	NM_001099678	leucine rich repeat containing 58	1
Goat-miR-30a	NM_001080485	zinc finger protein 275	1
Goat-miR-30a	NM_012288	translocation associated membrane protein 2	1
Goat-miR-30a	NM_198273	LysM, putative peptidoglycan-binding, domain containing 3	1
Goat-miR-30a	NM_003262	SEC62 homolog (S. cerevisiae)	1
Goat-miR-30a	NM_014935	pleckstrin homology domain containing, family A member 6	1
Goat-miR-30a	NM_018976	solute carrier family 38, member 2	1
Goat-miR-30a	NM_001085487	Myb-like, SWIRM and MPN domains 1	1
Goat-miR-30a	NM_004852	one cut homeobox 2	1
Goat-miR-30a	NM_006609	mitogen-activated protein kinase kinase kinase 2	1
Goat-miR-30a	NM_006315	polycomb group ring finger 3	1
Goat-miR-30a	NM_002229	jun B proto-oncogene	1
Goat-miR-30a	NM_006166	nuclear transcription factor Y, beta	1
Goat-miR-30a	NM_002080	glutamic-oxaloacetic transaminase 2, mitochondrial (aspartate aminotransferase 2)	1
Goat-miR-30a	NM_022041	gigaxonin	1
Goat-miR-30a	NM_001145541	t-complex 11 (mouse)-like 1	1
Goat-miR-30a	NM_025179	plexin A2	1
Goat-miR-30a	NM_001204204	SEC14-like 2 (S. cerevisiae)	1
Goat-miR-30a	NM_152787	TGF-beta activated kinase 1/MAP3K7 binding protein 3	1
Goat-miR-30a	NM_014048	MKL/myocardin-like 2	1
Goat-miR-30a	NM_001103146	GRB10 interacting GYF protein 2	1
Goat-miR-30a	NM_001242314	mitogen-activated protein kinase kinase kinase 13	1
Goat-miR-30a	NM_003559	phosphatidylinositol-5-phosphate 4-kinase, type II, beta	1
Goat-miR-30a	NM_001136154	v-ets erythroblastosis virus E26 oncogene homolog (avian)	1
Goat-miR-30a	NM_181521	CKLF-like MARVEL transmembrane domain containing 4	1
Goat-miR-30a	NM_015898	zinc finger and BTB domain containing 7A	1
Goat-miR-30a	NM_052848	coiled-coil domain containing 97	1
Goat-miR-30a	NM_015094	hypermethylated in cancer 2	1
Goat-miR-30a	NM_002336	low density lipoprotein receptor-related protein 6	1
Goat-miR-30a	NM_001015045	family with sequence similarity 13, member A	1
Goat-miR-30a	NM_020772	nuclear fragile X mental retardation protein interacting protein 2	1
Goat-miR-30a	NM_080616	chromosome 20 open reading frame 112	1
Goat-miR-30a	NM_152424	family with sequence similarity 123B	1
Goat-miR-30a	NM_001145520	retinoic acid induced 14	1
Goat-miR-30a	NM_007190	SEC23 interacting protein	1
Goat-miR-30a	NM_013320	host cell factor C2	1
Goat-miR-30a	NM_014909	vasohibin 1	1
Goat-miR-30a	NM_001130674	calumenin	1
Goat-miR-30a	NM_004442	EPH receptor B2	1
Goat-miR-30a	NM_033389	slingshot homolog 2 (Drosophila)	1
Goat-miR-30a	NM_015299	KH and NYN domain containing	1
Goat-miR-30a	NM_001076785	solute carrier family 7 (amino acid transporter light chain, y+L system), member 6	1
Goat-miR-30a	NM_206853	quaking homolog, KH domain RNA binding (mouse)	1
Goat-miR-30a	NM_015215	calmodulin binding transcription activator 1	1
Goat-miR-30a	NM_006549	calcium/calmodulin-dependent protein kinase kinase 2, beta	1
Goat-miR-30a	NM_005027	phosphoinositide-3-kinase, regulatory subunit 2 (beta)	1
Goat-miR-30a	NM_198465	Nik related kinase	1
Goat-miR-30a	NM_207303	attractin-like 1	1
Goat-miR-30a	NM_014053	feline leukemia virus subgroup C cellular receptor 1	1
Goat-miR-30a	NM_080627	KIAA0889	1
Goat-miR-30a	NM_006073	triadin	1
Goat-miR-30a	NM_144653	NACC family member 2, BEN and BTB (POZ) domain containing	1
Goat-miR-30a	NM_001134405	RUN domain containing 3B	1
Goat-miR-30a	NM_207391	regulator of G protein signaling 9 binding protein	1
Goat-miR-30a	NM_001204171	Mdm4 p53 binding protein homolog (mouse)	1
Goat-miR-30a	NM_032242	plexin A1	1
Goat-miR-30a	NM_001199679	transmembrane protein 56	1
Goat-miR-30a	NM_002033	fucosyltransferase 4 (alpha (1,3) fucosyltransferase, myeloid-specific)	1
Goat-miR-30a	NM_006768	BRCA1 associated protein	1
Goat-miR-30a	NM_015336	zinc finger, DHHC-type containing 17	1
Goat-miR-30a	NM_152527	solute carrier family 16, member 14 (monocarboxylic acid transporter 14)	1
Goat-miR-30a	NM_001080392	KIAA1147	1
Goat-miR-30a	NM_001163315	F-box and leucine-rich repeat protein 17	1
Goat-miR-30a	NM_001012279	chromosome 6 open reading frame 174	1
Goat-miR-30a	NM_024646	zyg-11 homolog B (C. elegans)	1
Goat-miR-30a	NM_020390	eukaryotic translation initiation factor 5A2	1
Goat-miR-30a	NM_003822	nuclear receptor subfamily 5, group A, member 2	1
Goat-miR-30a	NM_001197104	myeloid/lymphoid or mixed-lineage leukemia (trithorax homolog, Drosophila)	1
Goat-miR-30a	NM_001142333	RNA binding protein, fox-1 homolog (C. elegans) 1	1
Goat-miR-30a	NM_001204087	potassium intermediate/small conductance calcium-activated channel, subfamily N, member 3	1
Goat-miR-30a	NM_001197293	dihydropyrimidinase-like 2	1
Goat-miR-30a	NM_001105529	ATPase, aminophospholipid transporter (APLT), class I, type 8A, member 1	1
Goat-miR-30a	NM_001077440	BCL2-associated transcription factor 1	1
Goat-miR-30a	NM_001134398	vav 2 guanine nucleotide exchange factor	1
Goat-miR-30a	NM_018403	DCP1 decapping enzyme homolog A (S. cerevisiae)	1
Goat-miR-30a	NM_052859	RFT1 homolog (S. cerevisiae)	1
Goat-miR-30a	NM_004992	methyl CpG binding protein 2 (Rett syndrome)	1
Goat-miR-30a	NM_000833	glutamate receptor, ionotropic, N-methyl D-aspartate 2A	1
Goat-miR-30a	NM_000417	interleukin 2 receptor, alpha	1
Goat-miR-30a	NM_002945	replication protein A1, 70kDa	1
Goat-miR-30a	NM_007011	abhydrolase domain containing 2	1
Goat-miR-30a	NM_001127257	solute carrier family 39 (zinc transporter), member 10	1
Goat-miR-30a	NM_020914	ring finger protein 213	1
Goat-miR-30a	NM_178457	zinc finger protein 831	1
Goat-miR-30a	NM_180989	G protein-coupled receptor 180	1
Goat-miR-30a	NM_001134470	chromosome 3 open reading frame 58	1
Goat-miR-30a	NM_173814	protogenin	2
Goat-miR-30a	NM_000875	insulin-like growth factor 1 receptor	1
Goat-miR-30a	NM_014840	NUAK family, SNF1-like kinase, 1	1
Goat-miR-30a	NM_001136257	sphingomyelin synthase 2	2
Goat-miR-30a	NM_005076	contactin 2 (axonal)	2
Goat-miR-30a	NM_002270	transportin 1	1
Goat-miR-30a	NM_003389	coronin, actin binding protein, 2A	1
Goat-miR-30a	NM_015346	zinc finger, FYVE domain containing 26	1
Goat-miR-30a	NM_001001433	syntaxin 16	1
Goat-miR-30a	NM_002035	3-ketodihydrosphingosine reductase	1
Goat-miR-30a	NM_198549	family with sequence similarity 73, member A	1
Goat-miR-30a	NM_001043318	chromosome 14 open reading frame 43	1
Goat-miR-30a	NM_002126	hepatic leukemia factor	1
Goat-miR-30a	NM_015144	zinc finger, CCHC domain containing 14	1
Goat-miR-30a	NM_001083913	chromosome 10 open reading frame 26	1
Goat-miR-30a	NM_001031804	v-maf musculoaponeurotic fibrosarcoma oncogene homolog (avian)	1
Goat-miR-30a	NM_022730	COP9 constitutive photomorphogenic homolog subunit 7B (Arabidopsis)	1
Goat-miR-30a	NM_000682	adrenergic, alpha-2B-, receptor	1
Goat-miR-30a	NM_033502	transcriptional regulating factor 1	1
Goat-miR-30a	NM_198182	grainyhead-like 1 (Drosophila)	1
Goat-miR-30a	NM_001042555	fibroblast growth factor receptor substrate 2	1
Goat-miR-30a	NM_001040284	PAP associated domain containing 5	1
Goat-miR-30a	NM_021255	pellino homolog 2 (Drosophila)	1
Goat-miR-30a	NM_001168724	transmembrane protein 135	1
Goat-miR-30a	NM_178562	tetraspanin 33	1
Goat-miR-30a	NM_001134673	nuclear factor I/A	1
Goat-miR-30a	NM_018013	sine oculis binding protein homolog (Drosophila)	1
Goat-miR-30a	NM_001005463	early B-cell factor 3	1
Goat-miR-30a	NM_002149	hippocalcin-like 1	1
Goat-miR-30a	NM_000527	low density lipoprotein receptor	1
Goat-miR-30a	NM_152293	transcriptional adaptor 2B	1
Goat-miR-30a	NM_024776	NKF3 kinase family member	1
Goat-miR-30a	NM_014734	KIAA0247	1
Goat-miR-30a	NM_022731	nuclear casein kinase and cyclin-dependent kinase substrate 1	1
Goat-miR-30a	NM_052966	family with sequence similarity 129, member A	1
Goat-miR-30a	NM_178450	membrane-associated ring finger (C3HC4) 3	1
Goat-miR-30a	NM_005112	WD repeat domain 1	1
Goat-miR-30a	NM_016396	CTD (carboxy-terminal domain, RNA polymerase II, polypeptide A) small phosphatase like 2	1
Goat-miR-30a	NM_001171184	dystrophin related protein 2	1
Goat-miR-30a	NM_001159944	ecotropic viral integration site 5-like	1
Goat-miR-30a	NM_144993	tet oncogene family member 3	1
Goat-miR-30a	NM_001099270	zinc finger and BTB domain containing 34	1
Goat-miR-30a	NM_032329	inhibitor of growth family, member 5	1
Goat-miR-30a	NM_014388	digestive organ expansion factor homolog (zebrafish)	1
Goat-miR-30a	NM_022455	nuclear receptor binding SET domain protein 1	1
Goat-miR-30a	NM_001018088	vacuolar protein sorting 13 homolog C (S. cerevisiae)	1
Goat-miR-30a	NM_001009993	family with sequence similarity 168, member B	1
Goat-miR-30a	NM_016563	RAS-like, family 12	1
Goat-miR-30a	NM_005898	cell cycle associated protein 1	1
Goat-miR-30a	NM_001206999	citron (rho-interacting, serine/threonine kinase 21)	1
Goat-miR-30a	NM_001145365	zinc finger protein 652	1
Goat-miR-30a	NM_001171653	zinc finger E-box binding homeobox 2	1
Goat-miR-30a	NM_001042506	poly(A) binding protein, cytoplasmic 1-like 2B	1
Goat-miR-30a	NM_015306	ubiquitin specific peptidase 24	1
Goat-miR-30a	NM_015557	chromodomain helicase DNA binding protein 5	1
Goat-miR-30a	NM_000514	glial cell derived neurotrophic factor	1
Goat-miR-30a	NM_015315	La ribonucleoprotein domain family, member 1	1
Goat-miR-30a	NM_001186	BTB and CNC homology 1, basic leucine zipper transcription factor 1	1
Goat-miR-30a	NM_001039459	engulfment and cell motility 1	1
Goat-miR-30a	NM_004776	UDP-Gal:betaGlcNAc beta 1,4- galactosyltransferase, polypeptide 5	1
Goat-miR-30a	NM_017943	F-box protein 34	1
Goat-miR-30a	NM_001079514	ubinuclein 1	1
Goat-miR-30a	NM_020778	alpha-kinase 3	1
Goat-miR-30a	NM_001136156	zinc finger protein 507	1
Goat-miR-30a	NM_030918	sorting nexin family member 27	1
Goat-miR-30a	NM_005401	protein tyrosine phosphatase, non-receptor type 14	1
Goat-miR-30a	NM_020381	prenyl (decaprenyl) diphosphate synthase, subunit 2	1
Goat-miR-30a	NM_000724	calcium channel, voltage-dependent, beta 2 subunit	1
Goat-miR-30a	NM_002660	phospholipase C, gamma 1	1
Goat-miR-30a	NM_001012426	forkhead box P4	1
Goat-miR-30a	NM_000633	B-cell CLL/lymphoma 2	1
Goat-miR-30a	NM_007038	ADAM metallopeptidase with thrombospondin type 1 motif, 5	1
Goat-miR-30a	NM_004496	forkhead box A1	1
Goat-miR-30a	NM_001170794	BTB and CNC homology 1, basic leucine zipper transcription factor 2	1
Goat-miR-30a	NM_005715	uronyl-2-sulfotransferase	1
Goat-miR-30a	NM_002390	ADAM metallopeptidase domain 11	1
Goat-miR-30a	NM_001184935	neuregulin 2	1
Goat-miR-30a	NM_001040455	SID1 transmembrane family, member 2	1
Goat-miR-30a	NM_001128608	mitogen-activated protein kinase binding protein 1	1
Goat-miR-30a	NM_000720	calcium channel, voltage-dependent, L type, alpha 1D subunit	1
Goat-miR-30a	NM_031296	RAB33B, member RAS oncogene family	1
Goat-miR-30a	NM_001163788	ROD1 regulator of differentiation 1 (S. pombe)	1
Goat-miR-30a	NM_001128826	neuronal calcium sensor 1	1
Goat-miR-30a	NM_001172411	vang-like 1 (van gogh, Drosophila)	1
Goat-miR-30a	NM_175748	ubiquitin protein ligase E3 component n-recognin 7 (putative)	1
Goat-miR-30a	NM_001145155	nuclear receptor subfamily 2, group F, member 2	1
Goat-miR-30a	NM_022893	B-cell CLL/lymphoma 11A (zinc finger protein)	1
Goat-miR-30a	NM_001135095	fibronectin type III domain containing 3B	1
Goat-miR-30a	NM_000901	nuclear receptor subfamily 3, group C, member 2	1
Goat-miR-30a	NM_002205	integrin, alpha 5 (fibronectin receptor, alpha polypeptide)	1
Goat-miR-30a	NM_058238	wingless-type MMTV integration site family, member 7B	1
Goat-miR-30a	NM_001048209	neurotrimin	1
Goat-miR-30a	NM_001199880	early growth response 3	1
Goat-miR-30a	NM_014661	family with sequence similarity 53, member B	1
Goat-miR-30a	NM_016257	hippocalcin like 4	1
Goat-miR-30a	NM_001042533	MYC induced nuclear antigen	1
Goat-miR-30a	NM_181358	homeodomain interacting protein kinase 1	1
Goat-miR-30a	NM_019106	septin 3	1
Goat-miR-30a	NM_052897	methyl-CpG binding domain protein 6	1
Goat-miR-30a	NM_001142699	discs, large homolog 2 (Drosophila)	1
Goat-miR-30a	NM_173595	ankyrin repeat domain 52	1
Goat-miR-30a	NM_032023	Ras association (RalGDS/AF-6) domain family member 4	1
Goat-miR-30a	NM_005819	syntaxin 6	1
Goat-miR-30a	NM_004798	kinesin family member 3B	1
Goat-miR-30a	NM_001130105	collagen, type IV, alpha 3 (Goodpasture antigen) binding protein	1
Goat-miR-30a	NM_020748	integrator complex subunit 2	1
Goat-miR-30a	NM_001166345	MyoD family inhibitor domain containing	1
Goat-miR-30a	NM_001105539	zinc finger and BTB domain containing 10	1
Goat-miR-30a	NM_005921	mitogen-activated protein kinase kinase kinase 1	1
Goat-miR-30a	NM_003474	ADAM metallopeptidase domain 12	1
Goat-miR-30a	NM_001142568	bobby sox homolog (Drosophila)	1
Goat-miR-30a	NM_001042510	zinc finger protein 706	1
Goat-miR-30a	NM_004133	hepatocyte nuclear factor 4, gamma	1
Goat-miR-30a	NM_017771	PX domain containing serine/threonine kinase	1
Goat-miR-30a	NM_003068	snail homolog 2 (Drosophila)	1
Goat-miR-1307	NM_001146699	RNA binding motif protein 19	1
Goat-miR-1307	NM_207645	chromosome 11 open reading frame 87	1
Goat-miR-1307	NM_000633	B-cell CLL/lymphoma 2	1
Goat-miR-1307	NM_001167676	hypothetical LOC100128071	1
Goat-miR-1307	NM_000335	sodium channel, voltage-gated, type V, alpha subunit	1
Goat-miR-1307	NM_020699	GATA zinc finger domain containing 2B	1
Goat-miR-143	NM_004854	carbohydrate sulfotransferase 10	1
Goat-miR-143	NM_031412	GABA(A) receptor-associated protein like 1	1
Goat-miR-143	NM_001143778	ArfGAP with SH3 domain, ankyrin repeat and PH domain 3	1
Goat-miR-143	NM_005898	cell cycle associated protein 1	1
Goat-miR-143	NM_000555	doublecortin	1
Goat-miR-143	NM_153366	sushi, von Willebrand factor type A, EGF and pentraxin domain containing 1	1
Goat-miR-143	NM_014805	EPM2A (laforin) interacting protein 1	1
Goat-miR-143	NM_144709	pseudouridylate synthase 10	1
Goat-miR-143	NM_017896	chromosome 20 open reading frame 11	1
Goat-miR-143	NM_001987	ets variant 6	1
Goat-miR-143	NM_001136000	v-abl Abelson murine leukemia viral oncogene homolog 2	1
Goat-miR-143	NM_001015877	PHD finger protein 6	1
Goat-miR-143	NM_021999	integral membrane protein 2B	1
Goat-miR-143	NM_024490	ATPase, class V, type 10A	1
Goat-miR-143	NM_001010986	ATPase, class VI, type 11C	1
Goat-miR-143	NM_004274	A kinase (PRKA) anchor protein 6	1
Goat-miR-143	NM_002010	fibroblast growth factor 9 (glia-activating factor)	1
Goat-miR-143	NM_016548	golgi membrane protein 1	1
Goat-miR-143	NM_001103146	GRB10 interacting GYF protein 2	1
Goat-miR-143	NM_001159642	BCL2/adenovirus E1B 19kD interacting protein like	1
Goat-miR-143	NM_001752	catalase	1
Goat-miR-143	NM_133637	DEAQ box RNA-dependent ATPase 1	1
Goat-miR-143	NM_138962	musashi homolog 2 (Drosophila)	2
Goat-miR-143	NM_006357	ubiquitin-conjugating enzyme E2E 3	1
Goat-miR-143	NM_032849	chromosome 13 open reading frame 33	1
Goat-miR-143	NM_133334	Wolf-Hirschhorn syndrome candidate 1	1
Goat-miR-143	NM_004798	kinesin family member 3B	2
Goat-miR-143	NM_001242673	adenosylhomocysteinase-like 1	1
Goat-miR-143	NM_005253	FOS-like antigen 2	1
Goat-miR-143	NM_001024380	TM2 domain containing 2	1
Goat-miR-143	NM_002485	nibrin	1
Goat-miR-143	NM_001159770	solute carrier family 39 (metal ion transporter), member 11	1
Goat-miR-143	NM_001018039	Scm-like with four mbt domains 2	1
Goat-miR-143	NM_182565	family with sequence similarity 100, member B	1
Goat-miR-143	NM_000599	insulin-like growth factor binding protein 5	1
Goat-miR-143	NM_000210	integrin, alpha 6	1
Goat-miR-143	NM_176877	InaD-like (Drosophila)	1
Goat-miR-143	NM_017925	DENN/MADD domain containing 4C	1
Goat-miR-143	NM_001190987	serine/arginine-rich splicing factor 11	1
Goat-miR-143	NM_015012	transmembrane protein 41B	1
Goat-miR-143	NM_024789	transmembrane protein 180	1
Goat-miR-143	NM_005389	protein-L-isoaspartate (D-aspartate) O-methyltransferase	1
Goat-miR-143	NM_001135662	RAB7, member RAS oncogene family-like 1	1
Goat-miR-143	NM_000189	hexokinase 2	1
Goat-miR-143	NM_138700	tripartite motif containing 40	1
Goat-miR-143	NM_000068	calcium channel, voltage-dependent, P/Q type, alpha 1A subunit	1
Goat-miR-143	NM_052907	transmembrane protein 132B	1
Goat-miR-143	NM_014614	proteasome (prosome, macropain) activator subunit 4	1
Goat-miR-143	NM_006769	LIM domain only 4	1
Goat-miR-143	NM_030625	tet oncogene 1	1
Goat-miR-143	NM_001195677	VAMP (vesicle-associated membrane protein)-associated protein B and C	2
Goat-miR-143	NM_014252	solute carrier family 25 (mitochondrial carrier; ornithine transporter) member 15	1
Goat-miR-143	NM_173602	DIP2 disco-interacting protein 2 homolog B (Drosophila)	1
Goat-miR-143	NM_017420	SIX homeobox 4	1
Goat-miR-143	NM_006465	AT rich interactive domain 3B (BRIGHT-like)	1
Goat-miR-143	NM_001048183	phosphatase and actin regulator 4	1
Goat-miR-143	NM_004962	growth differentiation factor 10	1
Goat-miR-143	NM_001099666	protein prenyltransferase alpha subunit repeat containing 1	1
Goat-miR-143	NM_080723	neurensin 1	1
Goat-miR-143	NM_015509	NECAP endocytosis associated 1	1
Goat-miR-143	NM_015691	WWC family member 3	1
Goat-miR-143	NM_032599	family with sequence similarity 71, member F1	1
Goat-miR-143	NM_002486	nuclear cap binding protein subunit 1, 80kDa	1
Goat-miR-143	NM_001017928	coiled-coil domain containing 58	1
Goat-miR-143	NM_018036	ATG2 autophagy related 2 homolog B (S. cerevisiae)	1
Goat-miR-143	NM_023012	arginine/serine-rich coiled-coil 2	1
Goat-miR-143	NM_000168	GLI family zinc finger 3	1
Goat-miR-143	NM_001135608	Rho GTPase activating protein 26	2
Goat-miR-143	NM_007375	TAR DNA binding protein	1
Goat-miR-143	NM_002749	mitogen-activated protein kinase 7	1
Goat-miR-143	NM_001031717	cysteine-rich with EGF-like domains 1	1
Goat-miR-143	NM_020769	retrotransposon gag domain containing 1	1
Goat-miR-143	NM_005845	ATP-binding cassette, sub-family C (CFTR/MRP), member 4	1
Goat-miR-143	NM_001081492	keratin 80	1
Goat-miR-143	NM_001122842	nuclear receptor coactivator 7	1
Goat-miR-143	NM_153364	family with sequence similarity 71, member C	1
Goat-miR-143	NM_001625	adenylate kinase 2	1
Goat-miR-143	NM_030802	family with sequence similarity 117, member A	1
Goat-miR-143	NM_001195215	DENN/MADD domain containing 1B	1
Goat-miR-143	NM_002445	macrophage scavenger receptor 1	1
Goat-miR-143	NM_022835	pleckstrin homology domain containing, family G (with RhoGef domain) member 2	1
Goat-miR-143	NM_003188	mitogen-activated protein kinase kinase kinase 7	1
Goat-miR-143	NM_002076	glucosamine (N-acetyl)-6-sulfatase	1
Goat-miR-143	NM_001195296	mirror-image polydactyly 1	2
Goat-miR-143	NM_001166693	AF4/FMR2 family, member 1	1
Goat-miR-143	NM_015986	cytokine receptor-like factor 3	1
Goat-miR-143	NM_000908	natriuretic peptide receptor C/guanylate cyclase C (atrionatriuretic peptide receptor C)	1
Goat-miR-143	NM_001202476	ubiquitin-conjugating enzyme E2E 1	1
Goat-miR-143	NM_007225	neurexophilin 3	1
Goat-miR-143	NM_001145160	tropomyosin 4	2
Goat-miR-143	NM_002834	protein tyrosine phosphatase, non-receptor type 11	1
Goat-miR-143	NM_175854	PAN3 poly(A) specific ribonuclease subunit homolog (S. cerevisiae)	1
Goat-miR-143	NM_152446	centrosomal protein 128kDa	1
Goat-miR-143	NM_001173467	Sp7 transcription factor	1
Goat-miR-143	NM_001170803	La ribonucleoprotein domain family, member 4	1
Goat-miR-143	NM_173566	proline rich 14-like	1
Goat-miR-143	NM_001113182	bromodomain containing 2	2
Goat-miR-143	NM_001102653	OTU domain containing 4	1
Goat-miR-143	NM_006888	calmodulin 1 (phosphorylase kinase, delta)	1
Goat-miR-143	NM_001146158	mannosyl-oligosaccharide glucosidase	1
Goat-miR-143	NM_021083	X-linked Kx blood group (McLeod syndrome)	1
Goat-miR-143	NM_005584	mab-21-like 1 (C. elegans)	1
Goat-miR-143	NM_014155	zinc finger and BTB domain containing 44	1
Goat-miR-143	NM_001042758	SLIT-ROBO Rho GTPase activating protein 2	1
Goat-miR-143	NM_004783	TAO kinase 2	1
Goat-miR-143	NM_022051	egl nine homolog 1 (C. elegans)	1
Goat-miR-143	NM_004979	potassium voltage-gated channel, Shal-related subfamily, member 1	1
Goat-miR-143	NM_001798	cyclin-dependent kinase 2	1
Goat-miR-143	NM_001178032	zinc finger, C4H2 domain containing	1
Goat-miR-143	NM_012064	major intrinsic protein of lens fiber	1
Goat-miR-143	NM_001001936	actin filament associated protein 1-like 2	1
Goat-miR-143	NM_004999	myosin VI	1
Goat-miR-143	NM_001031680	runt-related transcription factor 3	1
Goat-miR-143	NM_004529	myeloid/lymphoid or mixed-lineage leukemia (trithorax homolog, Drosophila); translocated to, 3	1
Goat-miR-143	NM_001135811	family with sequence similarity 60, member A	1
Goat-miR-143	NM_002009	fibroblast growth factor 7	1
Goat-miR-143	NM_001128628	p21 protein (Cdc42/Rac)-activated kinase 6	1
Goat-miR-143	NM_005159	actin, alpha, cardiac muscle 1	1
Goat-miR-143	NM_004985	v-Ki-ras2 Kirsten rat sarcoma viral oncogene homolog	2
Goat-miR-143	NM_080670	solute carrier family 35, member A4	1
Goat-miR-143	NM_003149	SH3 and cysteine rich domain	1
Goat-miR-143	NM_000088	collagen, type I, alpha 1	1
Goat-miR-143	NM_139241	FYVE, RhoGEF and PH domain containing 4	1
Goat-miR-143	NM_021964	zinc finger protein 148	1
Goat-miR-143	NM_207043	endosulfine alpha	1
Goat-miR-143	NM_030952	NUAK family, SNF1-like kinase, 2	1
Goat-miR-143	NM_017824	membrane-associated ring finger (C3HC4) 5	1
Goat-miR-143	NM_001730	Kruppel-like factor 5 (intestinal)	1
Goat-miR-143	NM_014636	Ral GEF with PH domain and SH3 binding motif 1	1
Goat-miR-143	NM_001163673	WD repeat domain 81	1
Goat-miR-143	NM_004720	lysophosphatidic acid receptor 2	1
Goat-miR-143	NM_015367	BCL2-like 13 (apoptosis facilitator)	1
Goat-miR-143	NM_001099650	glucoside xylosyltransferase 1	1
Goat-miR-143	NM_007033	RER1 retention in endoplasmic reticulum 1 homolog (S. cerevisiae)	1
Goat-miR-143	NM_001040284	PAP associated domain containing 5	2
Goat-miR-143	NM_018013	sine oculis binding protein homolog (Drosophila)	1
Goat-miR-143	NM_001032221	syntaxin binding protein 1	1
Goat-miR-143	NM_001118	adenylate cyclase activating polypeptide 1 (pituitary) receptor type I	1
Goat-miR-143	NM_003320	tubby homolog (mouse)	1
Goat-miR-143	NM_001031812	casein kinase 1, gamma 3	1
Goat-miR-143	NM_007345	zinc finger protein 236	1
Goat-miR-143	NM_133444	zinc finger protein 526	1
Goat-miR-143	NM_014892	SR-related CTD-associated factor 8	1
Goat-miR-143	NM_005871	survival motor neuron domain containing 1	1
Goat-miR-143	NM_015047	KIAA0090	1
Goat-miR-143	NM_016353	zinc finger, DHHC-type containing 2	1
Goat-miR-143	NM_001142885	tropomodulin 2 (neuronal)	1
Goat-miR-143	NM_025153	ATPase, class V, type 10B	1
Goat-miR-143	NM_001083893	striatin, calmodulin binding protein 3	1
Goat-miR-143	NM_001001330	receptor accessory protein 3	1
Goat-miR-143	NM_001080481	ubiquitin specific peptidase 45	1
Goat-miR-143	NM_001177660	hyaluronan binding protein 2	1
Goat-miR-143	NM_020964	ectopic P-granules autophagy protein 5 homolog (C. elegans)	1
Goat-miR-143	NM_015836	tryptophanyl tRNA synthetase 2, mitochondrial	1
Goat-miR-143	NM_001121	adducin 3 (gamma)	1
Goat-miR-143	NM_002466	v-myb myeloblastosis viral oncogene homolog (avian)-like 2	1
Goat-miR-143	NM_001103184	formin 1	1
Goat-miR-143	NM_153487	MAM domain containing glycosylphosphatidylinositol anchor 1	1
Goat-miR-143	NM_014906	protein phosphatase, Mg2+/Mn2+ dependent, 1E	1
Goat-miR-143	NM_001128631	dephospho-CoA kinase domain containing	1
Goat-miR-143	NM_001137669	regulator of G-protein signaling like 1	1
Goat-miR-143	NM_033389	slingshot homolog 2 (Drosophila)	2
Goat-miR-143	NM_001163380	RAB2B, member RAS oncogene family	1
Goat-miR-143	NM_181712	KN motif and ankyrin repeat domains 4	1
Goat-miR-143	NM_018126	transmembrane protein 33	1
Goat-miR-143	NM_021946	BCL6 corepressor-like 1	1
Goat-miR-143	NM_020750	exportin 5	1
Goat-miR-143	NM_006260	DnaJ (Hsp40) homolog, subfamily C, member 3	1
Goat-miR-143	NM_001310	cAMP responsive element binding protein-like 2	1
Goat-miR-143	NM_001142544	cardiotrophin 1	1
Goat-miR-143	NM_000369	thyroid stimulating hormone receptor	1
Goat-miR-143	NM_152405	junction mediating and regulatory protein, p53 cofactor	1
Goat-miR-143	NM_032211	lysyl oxidase-like 4	1
Goat-miR-143	NM_001198818	APOBEC1 complementation factor	1
Goat-miR-143	NM_001031804	v-maf musculoaponeurotic fibrosarcoma oncogene homolog (avian)	1
Goat-miR-143	NM_014939	trafficking protein particle complex 8	1
Goat-miR-143	NM_005909	microtubule-associated protein 1B	1
Goat-miR-143	NM_001144758	pleckstrin homology-like domain, family B, member 1	1
Goat-miR-143	NM_130847	angiomotin like 1	1
Goat-miR-143	NM_001160328	synaptotagmin III	1
Goat-miR-143	NM_014314	DEAD (Asp-Glu-Ala-Asp) box polypeptide 58	1
Goat-miR-143	NM_017990	pyruvate dehydrogenase phosphatase regulatory subunit	1
Goat-miR-143	NM_002911	UPF1 regulator of nonsense transcripts homolog (yeast)	1
Goat-miR-143	NM_000920	pyruvate carboxylase	1
Goat-miR-143	NM_006162	nuclear factor of activated T-cells, cytoplasmic, calcineurin-dependent 1	1
Goat-miR-143	NM_022347	torsin A interacting protein 2	1
Goat-miR-143	NM_018489	ash1 (absent, small, or homeotic)-like (Drosophila)	1
Goat-miR-143	NM_001024613	FEZ family zinc finger 1	1
Goat-miR-143	NM_003284	transition protein 1 (during histone to protamine replacement)	1
Goat-miR-143	NM_001017440	calneuron 1	1
Goat-miR-143	NM_001042555	fibroblast growth factor receptor substrate 2	1
Goat-miR-143	NM_020850	RAN binding protein 10	1
Goat-miR-143	NM_001025780	family with sequence similarity 108, member B1	1
Goat-miR-143	NM_001039618	CREB/ATF bZIP transcription factor	2
Goat-miR-143	NM_015719	collagen, type V, alpha 3	1
Goat-miR-143	NM_031464	ribosomal protein S6 kinase-like 1	1
Goat-miR-143	NM_001127671	leukemia inhibitory factor receptor alpha	1
Goat-miR-143	NM_005907	mannosidase, alpha, class 1A, member 1	1
Goat-miR-143	NM_003357	secretoglobin, family 1A, member 1 (uteroglobin)	1
Goat-miR-143	NM_001198793	ARPC4-TTLL3 readthrough	1
Goat-miR-143	NM_002033	fucosyltransferase 4 (alpha (1,3) fucosyltransferase, myeloid-specific)	1
Goat-miR-143	NM_001043351	tropomyosin 3	2
Goat-miR-143	NM_001135095	fibronectin type III domain containing 3B	1
Goat-miR-143	NM_005597	nuclear factor I/C (CCAAT-binding transcription factor)	1
Goat-miR-143	NM_001112707	tousled-like kinase 2	1
Goat-miR-143	NM_006775	quaking homolog, KH domain RNA binding (mouse)	1
Goat-miR-143	NM_006896	homeobox A7	1
Goat-miR-143	NM_001901	connective tissue growth factor	1
Goat-miR-143	NM_001033604	Bardet-Biedl syndrome 9	1
Goat-miR-143	NM_014048	MKL/myocardin-like 2	2
Goat-miR-143	NM_001127357	putative homeodomain transcription factor 2	1
Goat-miR-143	NM_006517	solute carrier family 16, member 2 (monocarboxylic acid transporter 8)	3
Goat-miR-143	NM_005840	sprouty homolog 3 (Drosophila)	1
Goat-miR-143	NM_015035	zinc fingers and homeoboxes 3	1
Goat-miR-143	NM_001083625	ankyrin repeat domain 12	1
Goat-miR-143	NM_001127257	solute carrier family 39 (zinc transporter), member 10	1
Goat-miR-143	NM_006206	platelet-derived growth factor receptor, alpha polypeptide	1
Goat-miR-143	NM_006425	SLU7 splicing factor homolog (S. cerevisiae)	1
Goat-miR-143	NM_019556	motile sperm domain containing 1	1
Goat-miR-143	NM_014112	trichorhinophalangeal syndrome I	1
Goat-miR-143	NM_005977	ring finger protein (C3H2C3 type) 6	1
Goat-miR-143	NM_012114	caspase 14, apoptosis-related cysteine peptidase	1
Goat-miR-143	NM_014824	FCH and double SH3 domains 2	1
Goat-miR-143	NM_001126049	killin, p53-regulated DNA replication inhibitor	1
Goat-miR-143	NM_001406	ephrin-B3	1
Goat-miR-143	NM_000721	calcium channel, voltage-dependent, R type, alpha 1E subunit	1
Goat-miR-143	NM_030915	limb bud and heart development homolog (mouse)	1
Goat-miR-143	NM_001080469	F-box protein 46	1
Goat-miR-143	NM_022780	required for meiotic nuclear division 5 homolog A (S. cerevisiae)	1
Goat-miR-143	NM_020925	cache domain containing 1	1
Goat-miR-143	NM_016470	chromosome 20 open reading frame 111	1
Goat-miR-143	NM_015894	stathmin-like 3	1
Goat-miR-143	NM_021907	dystrobrevin, beta	1
Goat-miR-143	NM_001029858	solute carrier family 35, member F1	1
Goat-miR-143	NM_001199775	carboxypeptidase D	1
Goat-miR-143	NM_020348	cyclin M1	1
Goat-miR-143	NM_004287	golgi SNAP receptor complex member 2	1
Goat-miR-143	NM_004635	mitogen-activated protein kinase-activated protein kinase 3	1
Goat-miR-143	NM_001195059	pleckstrin homology domain containing, family O member 2	1
Goat-miR-143	NM_001006641	solute carrier family 25 (mitochondrial carrier; phosphate carrier), member 25	1
Goat-miR-143	NM_021035	zinc finger, NFX1-type containing 1	1
Goat-miR-143	NM_024787	ring finger protein 122	1
Goat-miR-143	NM_002356	myristoylated alanine-rich protein kinase C substrate	1
Goat-miR-143	NM_001134476	leucine rich repeat containing 8 family, member B	1
Goat-miR-143	NM_001170331	LanC lantibiotic synthetase component C-like 3 (bacterial)	1
Goat-miR-143	NM_020141	transmembrane protein 167B	1
Goat-miR-143	NM_024541	chromosome 10 open reading frame 76	1
Goat-miR-143	NM_020919	amyotrophic lateral sclerosis 2 (juvenile)	1
Goat-miR-143	NM_000610	CD44 molecule (Indian blood group)	1
Goat-miR-143	NM_000291	phosphoglycerate kinase 1	1
Goat-miR-143	NM_001013635	chromosome 12 open reading frame 68	1
Goat-miR-143	NM_020137	GRIP1 associated protein 1	1
Goat-miR-143	NM_001177381	cytoplasmic polyadenylation element binding protein 2	1
Goat-miR-143	NM_004841	RAS protein activator like 2	1
Goat-miR-143	NM_004588	sodium channel, voltage-gated, type II, beta	1
Goat-miR-143	NM_001098416	histone deacetylase 7	1
Goat-miR-143	NM_001166278	discs, large homolog 3 (Drosophila)	1
Goat-miR-143	NM_138435	family with sequence similarity 83, member F	1
Goat-miR-143	NM_014922	NLR family, pyrin domain containing 1	1
Goat-miR-143	NM_012288	translocation associated membrane protein 2	1
Goat-miR-143	NM_001042599	v-erb-a erythroblastic leukemia viral oncogene homolog 4 (avian)	1
Goat-miR-143	NM_001113239	homeodomain interacting protein kinase 2	1
Goat-miR-143	NM_001134285	estrogen-related receptor gamma	1
Goat-miR-143	NM_145808	myotrophin	1
Goat-miR-143	NM_144633	potassium voltage-gated channel, subfamily H (eag-related), member 8	1
Goat-miR-143	NM_017623	cyclin M3	1
Goat-miR-143	NM_002515	neuro-oncological ventral antigen 1	1
Goat-miR-143	NM_001145152	vacuolar protein sorting 37 homolog A (S. cerevisiae)	1
Goat-miR-143	NM_014424	heat shock 27kDa protein family, member 7 (cardiovascular)	1
Goat-miR-143	NM_018660	zinc finger protein 395	1
Goat-miR-143	NM_005668	ST8 alpha-N-acetyl-neuraminide alpha-2,8-sialyltransferase 4	1
Goat-miR-143	NM_001142386	pyruvate dehydrogenase kinase, isozyme 3	1
Goat-miR-143	NM_005400	protein kinase C, epsilon	1
Goat-miR-143	NM_005630	solute carrier organic anion transporter family, member 2A1	1
Goat-miR-143	NM_001190447	protein phosphatase 2, regulatory subunit B', alpha	1
Goat-miR-143	NM_144963	family with sequence similarity 91, member A1	1
Goat-miR-143	NM_016626	mex-3 homolog C (C. elegans)	1
Goat-miR-143	NM_001079559	heterogeneous nuclear ribonucleoprotein U-like 2	1
Goat-miR-143	NM_018071	Rho guanine nucleotide exchange factor (GEF) 40	1
Goat-miR-143	NM_002214	integrin, beta 8	1
Goat-miR-143	NM_001012994	sorting nexin family member 30	1
Goat-miR-143	NM_014909	vasohibin 1	1
Goat-miR-143	NM_001167580	synaptic vesicle glycoprotein 2B	1
Goat-miR-143	NM_014631	SH3 and PX domains 2A	2
Goat-miR-143	NM_001164440	ankyrin repeat domain 33B	1
Goat-miR-143	NM_001097633	glucosaminyl (N-acetyl) transferase 1, core 2	1
Goat-miR-143	NM_000124	excision repair cross-complementing rodent repair deficiency, complementation group 6	1
Goat-miR-143	NM_001077446	tRNA splicing endonuclease 34 homolog (S. cerevisiae)	1
Goat-miR-143	NM_001012241	male-specific lethal 1 homolog (Drosophila)	1
Goat-miR-143	NM_015253	WSC domain containing 1	1
Goat-miR-143	NM_001042494	solute carrier family 12 (potassium/chloride transporters), member 6	1
Goat-miR-143	NM_133374	zinc finger protein 618	1
Goat-miR-143	NM_005864	embryonal Fyn-associated substrate	1
Goat-miR-143	NM_001195415	doublecortin-like kinase 1	1
Goat-miR-143	NM_001008220	complexin 2	1
Goat-miR-143	NM_178123	SEC14 and spectrin domains 1	1
Goat-miR-143	NM_015995	Kruppel-like factor 13	1
Goat-miR-143	NM_001011666	cAMP responsive element binding protein 5	1
Goat-miR-143	NM_001195278	transmembrane protein 178-like	1
Goat-miR-143	NM_015315	La ribonucleoprotein domain family, member 1	1
Goat-miR-143	NM_001423	epithelial membrane protein 1	1
Goat-miR-143	NM_000966	retinoic acid receptor, gamma	1
Goat-miR-143	NM_001204103	palmitoyl-protein thioesterase 2	1
Goat-miR-143	NM_012471	transient receptor potential cation channel, subfamily C, member 5	1
Goat-miR-143	NM_001098426	SWI/SNF related, matrix associated, actin dependent regulator of chromatin, subfamily d, member 2	1
Goat-miR-143	NM_002613	3-phosphoinositide dependent protein kinase-1	1
Goat-miR-143	NM_004700	potassium voltage-gated channel, KQT-like subfamily, member 4	1
Goat-miR-143	NM_001042549	NSL1, MIND kinetochore complex component, homolog (S. cerevisiae)	1
Goat-miR-143	NM_001127240	BCL2 binding component 3	1
Goat-miR-143	NM_003482	myeloid/lymphoid or mixed-lineage leukemia 2	1
Goat-miR-143	NM_002235	potassium voltage-gated channel, shaker-related subfamily, member 6	1
Goat-miR-143	NM_002264	karyopherin alpha 1 (importin alpha 5)	1
Goat-miR-143	NM_000633	B-cell CLL/lymphoma 2	1
Goat-miR-143	NM_017759	INO80 complex subunit D	1
Goat-miR-143	NM_020733	HEG homolog 1 (zebrafish)	1
Goat-miR-143	NM_001080475	pleckstrin homology domain containing, family M, member 3	1
Goat-miR-143	NM_001185054	adducin 2 (beta)	1
Goat-miR-143	NM_004706	Rho guanine nucleotide exchange factor (GEF) 1	1
Goat-miR-143	NM_025250	tweety homolog 3 (Drosophila)	2
Goat-miR-143	NM_024709	chromosome 1 open reading frame 115	1
Goat-miR-143	NM_001184773	seizure related 6 homolog (mouse)-like	1
Goat-miR-143	NM_002745	mitogen-activated protein kinase 1	1
Goat-miR-143	NM_001145811	SRY (sex determining region Y)-box 6	1
Goat-miR-143	NM_000963	prostaglandin-endoperoxide synthase 2 (prostaglandin G/H synthase and cyclooxygenase)	1
Goat-miR-143	NM_152470	ring finger protein 165	1
Goat-miR-143	NM_018976	solute carrier family 38, member 2	1
Goat-miR-143	NM_006738	A kinase (PRKA) anchor protein 13	1
Goat-miR-143	NM_001134223	ubiquitin specific peptidase 46	1
Goat-miR-143	NM_001042603	lysine (K)-specific demethylase 5A	1
Goat-miR-143	NM_002657	pleiomorphic adenoma gene-like 2	1
Goat-miR-143	NM_153235	taxilin beta	1
Goat-miR-143	NM_001025580	Alport syndrome, mental retardation, midface hypoplasia and elliptocytosis chromosomal region gene 1	1
Goat-miR-143	NM_001193304	transmembrane protein 127	1
Goat-miR-143	NM_152756	RPTOR independent companion of MTOR, complex 2	1
Goat-miR-143	NM_001163788	ROD1 regulator of differentiation 1 (S. pombe)	1
Goat-miR-143	NM_002309	leukemia inhibitory factor (cholinergic differentiation factor)	1
Goat-miR-143	NM_001198783	POU class 2 homeobox 1	1
Goat-miR-143	NM_020122	potassium channel modulatory factor 1	1
Goat-miR-143	NM_012474	uridine-cytidine kinase 2	1
Goat-miR-143	NM_015516	tsukushi small leucine rich proteoglycan homolog (Xenopus laevis)	1
Goat-miR-143	NM_001174156	sterile alpha motif domain containing 8	1
Goat-miR-143	NM_013302	eukaryotic elongation factor-2 kinase	1
Goat-miR-143	NM_000393	collagen, type V, alpha 2	1
Goat-miR-143	NM_000800	fibroblast growth factor 1 (acidic)	1
Goat-miR-143	NM_001171940	fibronectin type III domain containing 5	1
Goat-miR-143	NM_006148	LIM and SH3 protein 1	1
Goat-miR-143	NM_001039469	MAP/microtubule affinity-regulating kinase 2	1
Goat-miR-143	NM_003458	bassoon (presynaptic cytomatrix protein)	1
Goat-miR-143	NM_001134382	IQ motif and Sec7 domain 1	1
Goat-miR-143	NM_016120	ring finger protein, LIM domain interacting	1
Goat-miR-143	NM_001037954	DIX domain containing 1	1
Goat-miR-143	NM_001039671	Yip1 interacting factor homolog B (S. cerevisiae)	1
Goat-miR-143	NM_032827	atonal homolog 8 (Drosophila)	1
Goat-miR-143	NM_000875	insulin-like growth factor 1 receptor	1
Goat-miR-143	NM_001142640	trinucleotide repeat containing 6C	1
Goat-miR-143	NM_001166005	erythrocyte membrane protein band 4.1 (elliptocytosis 1, RH-linked)	1
Goat-miR-143	NM_020796	sema domain, transmembrane domain (TM), and cytoplasmic domain, (semaphorin) 6A	1
Goat-miR-143	NM_001795	cadherin 5, type 2 (vascular endothelium)	1
Goat-miR-143	NM_014023	WD repeat domain 37	1
Goat-miR-143	NM_020911	plexin A4	1
Goat-miR-143	NM_014692	SEC14-like 5 (S. cerevisiae)	1

## Sheet: Table S4
Table S4. Predicted KEGG pathways targeted by differentially expressed miRNAs.
KEGG Pathway ID	KEGG Pathway Name	Gene Count	PERCENT(%)	Genbank ID
hsa04722	Neurotrophin signaling pathway	22	2.09724	NM_001006932, NM_005633, NM_000633, NM_002749, NM_002745, NM_001042555, NM_005027, NM_006888, NM_001455, NM_001143805, NM_001010942, NM_004985, NM_005026, NM_001025242, NM_002834, NM_005475, NM_005921, NM_001135699, NM_001221, NM_002660, NM_002524, NM_005923
hsa04360	Axon guidance	19	1.81125	NM_004439, NM_005761, NM_001042758, NM_002745, NM_004555, NM_001128628, NM_003873, NM_170744, NM_004985, NM_020796, NM_032242, NM_004952, NM_001145845, NM_006162, NM_001406, NM_004442, NM_002524, NM_025179, NM_001003407
hsa04144	Endocytosis	23	2.19256	NM_006206, NM_001042599, NM_000684, NM_001134382, NM_003559, NM_001011703, NM_001024666, NM_001004106, NM_000527, NM_007013, NM_005188, NM_006154, NM_001143778, NM_000417, NM_000875, NM_001130916, NM_001145152, NM_014203, NM_022340, NM_014043, NM_003026, NM_032932, NM_012287
hsa05210	Colorectal cancer	14	1.3346	NM_006206, NM_004423, NM_005633, NM_000633, NM_005359, NM_002745, NM_001466, NM_005027, NM_005026, NM_004985, NM_000875, NM_001130916, NM_012096, NM_003505
hsa04010	MAPK signaling pathway	28	2.66921	NM_004783, NM_003188, NM_000267, NM_000800, NM_004635, NM_004985, NM_000575, NM_000724, NM_021003, NM_000720, NM_001130916, NM_000721, NM_002524, NM_006206, NM_001123066, NM_005633, NM_001006932, NM_002749, NM_002009, NM_002745, NM_000719, NM_001143805, NM_001010942, NM_014247, NM_005921, NM_006609, NM_002010, NM_005923
hsa05414	Dilated cardiomyopathy	14	1.3346	NM_015270, NM_000337, NM_000210, NM_000684, NM_002214, NM_000212, NM_000719, NM_002205, NM_005159, NM_000724, NM_000720, NM_001145160, NM_001043351, NM_000109
hsa05214	Glioma	11	1.04862	NM_006206, NM_005026, NM_004985, NM_005633, NM_000875, NM_002745, NM_001221, NM_002660, NM_005027, NM_006888, NM_002524 274
hsa05200	Pathways in cancer	31	2.9552	NM_000168, NM_000800, NM_000264, NM_005359, NM_005270, NM_001798, NM_001466, NM_005027, NM_004985, NM_001130916, NM_012096, NM_000963, NM_001043351, NM_002660, NM_002524, NM_006206, NM_004423, NM_022051, NM_005633, NM_000633, NM_002009, NM_000210, NM_002745, NM_001167, NM_005026, NM_005188, NM_058238, NM_000875, NM_002010, NM_005436, NM_003505
hsa04930	Type II diabetes mellitus	9	0.85796	NM_005026, NM_000189, NM_000720, NM_002745, NM_000721, NM_005400, NM_003745, NM_005027, NM_000719
hsa04660	T cell receptor signaling pathway	14	1.3346	NM_003188, NM_005633, NM_004555, NM_002745, NM_001128628, NM_005027, NM_005026, NM_005188, NM_004985, NM_006139, NM_001134398, NM_006162, NM_002660, NM_002524
hsa04510	Focal adhesion	21	2.00191	NM_006206, NM_002613, NM_000088, NM_015719, NM_005633, NM_000633, NM_000210, NM_002745, NM_001167, NM_000212, NM_002214, NM_003247, NM_001128628, NM_005027, NM_002205, NM_001010942, NM_005026, NM_000393, NM_019105, NM_000875, NM_001134398
hsa05410	Hypertrophic cardiomyopathy (HCM)	12	1.14395	NM_005159, NM_000724, NM_000337, NM_000720, NM_000210, NM_000212, NM_002214, NM_001145160, NM_000109, NM_001043351, NM_002205, NM_000719
hsa04012	ErbB signaling pathway	12	1.14395	NM_005188, NM_005026, NM_004985, NM_001042599, NM_005633, NM_002745, NM_001136000, NM_001221, NM_001128628, NM_002660, NM_005027, NM_002524
hsa05223	Non-small cell lung cancer	9	0.85796	NM_002613, NM_005026, NM_004985, NM_005633, NM_002745, NM_002660, NM_005027, NM_002524, NM_001455
hsa05215	Prostate cancer	12	1.14395	NM_001011666, NM_002613, NM_006206, NM_005026, NM_004985, NM_005633, NM_000875, NM_000633, NM_002745, NM_001798, NM_005027, NM_002524
hsa04720	Long-term potentiation	10	0.953289	NM_001010942, NM_000833, NM_004985, NM_001006932, NM_000838, NM_002745, NM_001221, NM_006888, NM_002524, NM_000719
hsa04810	Regulation of actin cytoskeleton	21	2.00191	NM_006206, NM_006572, NM_004706, NM_033389, NM_005633, NM_000800, NM_002009, NM_000210, NM_002745, NM_003559, NM_000212, NM_002214, NM_001128628, NM_005027, NM_002205, NM_005026, NM_004985, NM_001134398, NM_001008493, NM_002010, NM_002524
hsa05211	Renal cell carcinoma	10	0.953289	NM_001010942, NM_005026, NM_004985, NM_022051, NM_005633, NM_002834, NM_002745, NM_001128628, NM_005027, NM_002524
hsa05218	Melanoma	10	0.953289	NM_006206, NM_005026, NM_004985, NM_000875, NM_000800, NM_002009, NM_002745, NM_002010, NM_005027, NM_002524
hsa04512	ECM-receptor interaction	11	1.04862	NM_000088, NM_000610, NM_015719, NM_000393, NM_019105, NM_001167580, NM_000210, NM_000212, NM_002214, NM_003247, NM_002205
hsa04120	Ubiquitin mediated proteolysis	15	1.42993	NM_080678, NM_001167, NM_016021, NM_018227, NM_003745, NM_001013415, NM_007013, NM_005188, NM_006154, NM_001079872, NM_006357, NM_005921, NM_199423, NM_004238, NM_001111112
hsa04912	GnRH signaling pathway	12	1.14395	NM_004985, NM_005633, NM_015270, NM_002749, NM_000720, NM_005921, NM_002745, NM_001221, NM_006609, NM_006888, NM_002524, NM_000719
hsa05220	Chronic myeloid leukemia	10	0.953289	NM_005188, NM_005026, NM_004985, NM_005633, NM_002834, NM_005359, NM_001130916, NM_002745, NM_005027, NM_002524 274
hsa04370	VEGF signaling pathway	10	0.953289	NM_005026, NM_004985, NM_000963, NM_002745, NM_004555, NM_006162, NM_004635, NM_002660, NM_005027, NM_002524
hsa05412	Arrhythmogenic right ventricular cardiomyopathy (ARVC)	10	0.953289	NM_004949, NM_000724, NM_000337, NM_000720, NM_000210, NM_000212, NM_002214, NM_000109, NM_002205, NM_000719
hsa05213	Endometrial cancer	8	0.762631	NM_002613, NM_005026, NM_004985, NM_005633, NM_002745, NM_005027, NM_002524, NM_001455
hsa04540	Gap junction	11	1.04862	NM_006206, NM_004985, NM_005633, NM_015270, NM_000838, NM_002749, NM_000684, NM_002745, NM_030773, NM_006609, NM_002524
hsa04340	Hedgehog signaling pathway	8	0.762631	NM_016277, NM_000168, NM_058238, NM_001031812, NM_000264, NM_004525, NM_005270, NM_022048
hsa04916	Melanogenesis	11	1.04862	NM_004423, NM_000115, NM_004985, NM_015270, NM_058238, NM_002745, NM_001221, NM_001466, NM_006888, NM_002524, NM_003505
hsa04320	Dorso-ventral axis formation	5	0.476644	NM_004985, NM_017617, NM_005633, NM_002745, NM_001987
hsa04662	B cell receptor signaling pathway	9	0.85796	NM_005026, NM_004985, NM_005633, NM_001134398, NM_002745, NM_004555, NM_006162, NM_005027, NM_002524
hsa04664	Fc epsilon RI signaling pathway	9	0.85796	NM_005026, NM_004985, NM_005633, NM_001134398, NM_002745, NM_005400, NM_002660, NM_005027, NM_002524
hsa04150	mTOR signaling pathway	7	0.667302	NM_002613, NM_019058, NM_005026, NM_001006932, NM_002745, NM_152756, NM_005027
hsa04960	Aldosterone-regulated sodium reabsorption	6	0.571973	NM_002613, NM_000901, NM_005026, NM_004985, NM_002745, NM_005027
hsa05216	Thyroid cancer	5	0.476644	NM_004985, NM_002745, NM_001043351, NM_002524, NM_005436
hsa05217	Basal cell carcinoma	7	0.667302	NM_004423, NM_000168, NM_058238, NM_000264, NM_005270, NM_001466, NM_003505

## Sheet: Table S5-1
Table S5. Predicted GO analysis targeted by differentially expressed miRNAs (Biological Process).
GO Accession	GO Terms	gene count	PERCENT(%)	PValue	Genbank ID
GO:0045449	regulation of transcription	220	20.9724	3.35302e-10	NM_033502, NM_001717, NM_002586, NM_014155, NM_001034914, NM_014415, NM_015898, NM_005603, NM_001130916, NM_032827, NM_007345, NM_018660, NM_001080470, NM_000514, NM_001080485, NM_015975, NM_006874, NM_002466, NM_016120, NM_005359, NM_022455, NM_005977, NM_017637, NM_006315, NM_014938, NM_030915, NM_001113239, NM_001142568, NM_000966, NM_001015877, NM_022841, NM_000109, NM_001145365, NM_032329, N…
GO:0006350	transcription	172	16.3966	6.26378e-07	NM_000901, NM_000168, NM_033502, NM_033067, NM_001170765, NM_006940, NM_001717, NM_002586, NM_002114, NM_014155, NM_001034914, NM_014415, NM_015898, NM_018181, NM_032827, NM_002501, NM_133334, NM_018660, NM_007345, NM_015094, NM_004774, NM_001080470, NM_001722, NM_007249, NM_001161572, NM_017780, NM_015215, NM_001085487, NM_001077261, NM_001080485, NM_005686, NM_004973, NM_015975, NM_006874, NM_0…
GO:0051252	regulation of RNA metabolic process	145	13.8227	2.25339e-05	NM_000901, NM_002486, NM_033502, NM_033067, NM_001170765, NM_006940, NM_002586, NM_002309, NM_002114, NM_001034914, NM_015898, NM_001159675, NM_021003, NM_002501, NM_133334, NM_018660, NM_007345, NM_015094, NM_004774, NM_000514, NM_007249, NM_001161572, NM_001085487, NM_001077261, NM_001080485, NM_004973, NM_015975, NM_006874, NM_005921, NM_004575, NM_001270, NM_022062, NM_003709, NM_001145097, N…
GO:0006355	regulation of transcription, DNA-dependent	137	13.0601	0.000206899	NM_000901, NM_033502, NM_033067, NM_001170765, NM_006940, NM_002586, NM_002309, NM_002114, NM_001034914, NM_015898, NM_021003, NM_002501, NM_133334, NM_018660, NM_007345, NM_015094, NM_004774, NM_000514, NM_007249, NM_001161572, NM_001085487, NM_001077261, NM_001080485, NM_004973, NM_015975, NM_006874, NM_005921, NM_004575, NM_001270, NM_022062, NM_003709, NM_001145097, NM_001098426, NM_022455, N…
GO:0007242	intracellular signaling cascade	106	10.1049	4.71997e-05	NM_004783, NM_003149, NM_004163, NM_176877, NM_000267, NM_000800, NM_000369, NM_001080475, NM_016563, NM_006738, NM_001130916, NM_000908, NM_004774, NM_016131, NM_001006932, NM_001039469, NM_014636, NM_005400, NM_003745, NM_001010942, NM_002853, NM_016277, NM_004972, NM_139241, NM_001112707, NM_001134398, NM_005921, NM_003647, NM_001001132, NM_005923, NM_001901, NM_004232, NM_001466, NM_000599, N…
GO:0010604	positive regulation of macromolecule metabolic process	86	8.19828	4.25871e-07	NM_002486, NM_017420, NM_017617, NM_000168, NM_033502, NM_021964, NM_006940, NM_002586, NM_002309, NM_002943, NM_003108, NM_003107, NM_000575, NM_003822, NM_006154, NM_021003, NM_000124, NM_001130916, NM_020390, NM_005191, NM_003489, NM_001001936, NM_004774, NM_004423, NM_005597, NM_000514, NM_007249, NM_001085487, NM_003747, NM_001172173, NM_001136031, NM_001145811, NM_001126054, NM_001025242, N…
GO:0031328	positive regulation of cellular biosynthetic process	79	7.53098	3.92717e-09	NM_017420, NM_017617, NM_000168, NM_033502, NM_021964, NM_006940, NM_002586, NM_002309, NM_002943, NM_003108, NM_003107, NM_000575, NM_003822, NM_001134445, NM_021003, NM_001130916, NM_020390, NM_005191, NM_003489, NM_001001936, NM_004774, NM_004423, NM_005597, NM_000514, NM_007249, NM_001085487, NM_003747, NM_001172173, NM_001145811, NM_001126054, NM_001025242, NM_004972, NM_006166, NM_005921, N…
GO:0009891	positive regulation of biosynthetic process	79	7.53098	7.65482e-09	NM_017420, NM_017617, NM_000168, NM_033502, NM_021964, NM_006940, NM_002586, NM_002309, NM_002943, NM_003108, NM_003107, NM_000575, NM_003822, NM_001134445, NM_021003, NM_001130916, NM_020390, NM_005191, NM_003489, NM_001001936, NM_004774, NM_004423, NM_005597, NM_000514, NM_007249, NM_001085487, NM_003747, NM_001172173, NM_001145811, NM_001126054, NM_001025242, NM_004972, NM_006166, NM_005921, N…
GO:0006357	regulation of transcription from RNA polymerase II promoter	78	7.43565	1.12481e-07	NM_017420, NM_017617, NM_003205, NM_021964, NM_152405, NM_001170765, NM_006940, NM_005253, NM_002586, NM_002309, NM_002114, NM_002943, NM_003108, NM_003822, NM_006154, NM_001034914, NM_015898, NM_003489, NM_004774, NM_005597, NM_000514, NM_007249, NM_001077261, NM_003601, NM_001172173, NM_001145811, NM_001126054, NM_004973, NM_015975, NM_006874, NM_005921, NM_004575, NM_001001928, NM_001270, NM_0…
GO:0010557	positive regulation of macromolecule biosynthetic process	77	7.34032	2.60613e-09	NM_017420, NM_017617, NM_000168, NM_033502, NM_021964, NM_006940, NM_002586, NM_002309, NM_002943, NM_003108, NM_003107, NM_000575, NM_003822, NM_021003, NM_001130916, NM_020390, NM_005191, NM_003489, NM_001001936, NM_004774, NM_004423, NM_005597, NM_000514, NM_007249, NM_001085487, NM_003747, NM_001172173, NM_001145811, NM_001025242, NM_001126054, NM_006166, NM_005921, NM_004575, NM_001001928, N…
GO:0006796	phosphate metabolic process	77	7.34032	0.00368527	NM_003188, NM_004783, NM_001396, NM_004439, NM_004635, NM_001136154, NM_014911, NM_001130105, NM_005401, NM_021003, NM_000124, NM_001130916, NM_020778, NM_004442, NM_001002838, NM_001006932, NM_013302, NM_004720, NM_014906, NM_001039469, NM_005400, NM_001128628, NM_003747, NM_001025242, NM_001126054, NM_004972, NM_001112707, NM_139241, NM_005921, NM_001221, NM_015083, NM_005923, NM_003816, NM_002…
GO:0006793	phosphorus metabolic process	77	7.34032	0.00368527	NM_003188, NM_004783, NM_001396, NM_004439, NM_004635, NM_001136154, NM_014911, NM_001130105, NM_005401, NM_021003, NM_000124, NM_001130916, NM_020778, NM_004442, NM_001002838, NM_001006932, NM_013302, NM_004720, NM_014906, NM_001039469, NM_005400, NM_001128628, NM_003747, NM_001025242, NM_001126054, NM_004972, NM_001112707, NM_139241, NM_005921, NM_001221, NM_015083, NM_005923, NM_003816, NM_002…
GO:0051173	positive regulation of nitrogen compound metabolic process	76	7.245	2.99367e-09	NM_002486, NM_017420, NM_017617, NM_000168, NM_033502, NM_021964, NM_006940, NM_002586, NM_002309, NM_002943, NM_003108, NM_003107, NM_003822, NM_001134445, NM_021003, NM_000124, NM_001130916, NM_005191, NM_003489, NM_001001936, NM_004774, NM_004423, NM_005597, NM_000514, NM_007249, NM_001085487, NM_003747, NM_001172173, NM_001145811, NM_001126054, NM_001025242, NM_004972, NM_006166, NM_005921, N…
GO:0045935	positive regulation of nucleobase, nucleoside, nucleotide and nucleic acid metabolic process	74	7.05434	4.00736e-09	NM_002486, NM_017420, NM_017617, NM_000168, NM_033502, NM_021964, NM_006940, NM_002586, NM_002309, NM_002943, NM_003108, NM_003107, NM_003822, NM_021003, NM_000124, NM_001130916, NM_005191, NM_003489, NM_001001936, NM_004774, NM_004423, NM_005597, NM_000514, NM_007249, NM_001085487, NM_003747, NM_001172173, NM_001145811, NM_001025242, NM_001126054, NM_006166, NM_005921, NM_004575, NM_001001928, N…
GO:0010605	negative regulation of macromolecule metabolic process	73	6.95901	5.08671e-06	NM_002193, NM_000268, NM_000168, NM_021964, NM_001142640, NM_003284, NM_001170765, NM_002114, NM_007013, NM_014818, NM_006154, NM_001034914, NM_015898, NM_005603, NM_199423, NM_014112, NM_003489, NM_144653, NM_001077440, NM_015094, NM_005597, NM_007249, NM_012199, NM_003745, NM_006965, NM_001077261, NM_001145811, NM_016277, NM_004973, NM_015975, NM_004575, NM_001001928, NM_003068, NM_001171653, N…
GO:0016310	phosphorylation	71	6.76835	0.000258745	NM_003188, NM_004783, NM_001396, NM_004439, NM_004635, NM_001136154, NM_014911, NM_001130105, NM_000124, NM_001130916, NM_020778, NM_004442, NM_001002838, NM_001006932, NM_013302, NM_004720, NM_001039469, NM_005400, NM_001128628, NM_003747, NM_001025242, NM_001126054, NM_004972, NM_001112707, NM_139241, NM_005921, NM_001221, NM_015083, NM_005923, NM_003816, NM_002613, NM_000291, NM_001042599, NM_…
GO:0008104	protein localization	70	6.67302	0.00534548	NM_004783, NM_004163, NM_000168, NM_005819, NM_032970, NM_017943, NM_006154, NM_002445, NM_020390, NM_022340, NM_014112, NM_024989, NM_012095, NM_012288, NM_032410, NM_016131, NM_012316, NM_004525, NM_001012994, NM_002264, NM_003747, NM_001018088, NM_007190, NM_001007024, NM_001136031, NM_003916, NM_016277, NM_004972, NM_198551, NM_014203, NM_021072, NM_031296, NM_002010, NM_001080779, NM_032932,…
GO:0045941	positive regulation of transcription	69	6.57769	4.15963e-09	NM_017420, NM_017617, NM_000168, NM_033502, NM_021964, NM_006940, NM_002586, NM_002309, NM_002943, NM_003108, NM_003107, NM_003822, NM_021003, NM_001130916, NM_005191, NM_003489, NM_001001936, NM_004774, NM_004423, NM_005597, NM_000514, NM_007249, NM_001085487, NM_001172173, NM_001145811, NM_001025242, NM_001126054, NM_006166, NM_005921, NM_004575, NM_001001928, NM_014048, NM_003709, NM_002657, N…
GO:0010628	positive regulation of gene expression	69	6.57769	1.4046e-08	NM_017420, NM_017617, NM_000168, NM_033502, NM_021964, NM_006940, NM_002586, NM_002309, NM_002943, NM_003108, NM_003107, NM_003822, NM_021003, NM_001130916, NM_005191, NM_003489, NM_001001936, NM_004774, NM_004423, NM_005597, NM_000514, NM_007249, NM_001085487, NM_001172173, NM_001145811, NM_001025242, NM_001126054, NM_006166, NM_005921, NM_004575, NM_001001928, NM_014048, NM_003709, NM_002657, N…
GO:0042127	regulation of cell proliferation	68	6.48236	0.000734128	NM_005584, NM_017617, NM_000268, NM_002945, NM_000168, NM_000267, NM_000800, NM_000264, NM_005253, NM_001717, NM_004537, NM_002309, NM_000369, NM_003107, NM_003873, NM_003822, NM_000575, NM_000417, NM_001130916, NM_020390, NM_005191, NM_144653, NM_001142544, NM_001166278, NM_014909, NM_002009, NM_001127671, NM_001143805, NM_001159642, NM_004973, NM_004972, NM_001163278, NM_002010, NM_001221, NM_0…
GO:0042981	regulation of apoptosis	67	6.38704	0.00204713	NM_003188, NM_017617, NM_000168, NM_000267, NM_152405, NM_001135733, NM_001752, NM_015225, NM_003107, NM_015367, NM_000575, NM_001034914, NM_000417, NM_000124, NM_006738, NM_001130916, NM_001077440, NM_001042371, NM_000610, NM_000514, NM_001135155, NM_005633, NM_177551, NM_005871, NM_001167, NM_005400, NM_021999, NM_001143805, NM_022835, NM_001172173, NM_001025242, NM_015975, NM_004972, NM_001127…
GO:0043067	regulation of programmed cell death	67	6.38704	0.00254613	NM_003188, NM_017617, NM_000168, NM_000267, NM_152405, NM_001135733, NM_001752, NM_015225, NM_003107, NM_015367, NM_000575, NM_001034914, NM_000417, NM_000124, NM_006738, NM_001130916, NM_001077440, NM_001042371, NM_000610, NM_000514, NM_001135155, NM_005633, NM_177551, NM_005871, NM_001167, NM_005400, NM_021999, NM_001143805, NM_022835, NM_001172173, NM_001025242, NM_015975, NM_004972, NM_001127…
GO:0010941	regulation of cell death	67	6.38704	0.00276083	NM_003188, NM_017617, NM_000168, NM_000267, NM_152405, NM_001135733, NM_001752, NM_015225, NM_003107, NM_015367, NM_000575, NM_001034914, NM_000417, NM_000124, NM_006738, NM_001130916, NM_001077440, NM_001042371, NM_000610, NM_000514, NM_001135155, NM_005633, NM_177551, NM_005871, NM_001167, NM_005400, NM_021999, NM_001143805, NM_022835, NM_001172173, NM_001025242, NM_015975, NM_004972, NM_001127…
GO:0006468	protein amino acid phosphorylation	66	6.29171	1.83785e-05	NM_003188, NM_004783, NM_001396, NM_004439, NM_004635, NM_001136154, NM_014911, NM_001130105, NM_000124, NM_001130916, NM_020778, NM_004442, NM_001002838, NM_001006932, NM_013302, NM_004720, NM_001039469, NM_005400, NM_001128628, NM_003747, NM_001025242, NM_001126054, NM_004972, NM_001112707, NM_139241, NM_005921, NM_001221, NM_015083, NM_005923, NM_003816, NM_002613, NM_001042599, NM_001042555, …
GO:0015031	protein transport	65	6.19638	0.00136457	NM_004783, NM_004163, NM_000168, NM_005819, NM_032970, NM_017943, NM_006154, NM_002445, NM_020390, NM_022340, NM_014112, NM_024989, NM_012095, NM_012288, NM_032410, NM_016131, NM_012316, NM_004525, NM_001012994, NM_002264, NM_003747, NM_007190, NM_001007024, NM_001136031, NM_003916, NM_016277, NM_004972, NM_198551, NM_014203, NM_031296, NM_002010, NM_001080779, NM_032932, NM_000088, NM_001168407,…
GO:0045184	establishment of protein localization	65	6.19638	0.00170832	NM_004783, NM_004163, NM_000168, NM_005819, NM_032970, NM_017943, NM_006154, NM_002445, NM_020390, NM_022340, NM_014112, NM_024989, NM_012095, NM_012288, NM_032410, NM_016131, NM_012316, NM_004525, NM_001012994, NM_002264, NM_003747, NM_007190, NM_001007024, NM_001136031, NM_003916, NM_016277, NM_004972, NM_198551, NM_014203, NM_031296, NM_002010, NM_001080779, NM_032932, NM_000088, NM_001168407,…
GO:0010558	negative regulation of macromolecule biosynthetic process	62	5.91039	4.42155e-07	NM_002193, NM_000268, NM_000168, NM_021964, NM_003284, NM_001170765, NM_002114, NM_007013, NM_014818, NM_006154, NM_001034914, NM_015898, NM_005603, NM_014112, NM_003489, NM_144653, NM_001077440, NM_015094, NM_005597, NM_007249, NM_012199, NM_006965, NM_001077261, NM_001145811, NM_004973, NM_015975, NM_004575, NM_001001928, NM_003068, NM_001171653, NM_003505, NM_001145097, NM_016120, NM_175061, N…
GO:0009890	negative regulation of biosynthetic process	62	5.91039	2.1272e-06	NM_002193, NM_000268, NM_000168, NM_021964, NM_003284, NM_001170765, NM_002114, NM_007013, NM_014818, NM_006154, NM_001034914, NM_015898, NM_005603, NM_014112, NM_003489, NM_144653, NM_001077440, NM_015094, NM_005597, NM_007249, NM_012199, NM_006965, NM_001077261, NM_001145811, NM_004973, NM_015975, NM_004575, NM_001001928, NM_003068, NM_001171653, NM_003505, NM_001145097, NM_016120, NM_175061, N…
GO:0009057	macromolecule catabolic process	62	5.91039	0.00866191	NM_001163315, NM_003350, NM_033274, NM_002486, NM_002945, NM_022041, NM_001080469, NM_007013, NM_017944, NM_017943, NM_006154, NM_018403, NM_001136115, NM_199423, NM_032268, NM_001111112, NM_001134223, NM_006537, NM_024646, NM_016172, NM_175748, NM_002911, NM_080678, NM_012199, NM_001167, NM_001085487, NM_003745, NM_020760, NM_005188, NM_001136031, NM_006768, NM_001079872, NM_005921, NM_001080481…
GO:0010629	negative regulation of gene expression	61	5.81506	5.68666e-08	NM_000168, NM_021964, NM_001142640, NM_003284, NM_001170765, NM_002114, NM_007013, NM_014818, NM_006154, NM_001034914, NM_015898, NM_005603, NM_199423, NM_014112, NM_003489, NM_144653, NM_001077440, NM_015094, NM_005597, NM_007249, NM_012199, NM_006965, NM_001077261, NM_001145811, NM_004973, NM_015975, NM_004575, NM_001001928, NM_003068, NM_001171653, NM_003505, NM_001145097, NM_024674, NM_016120…
GO:0031327	negative regulation of cellular biosynthetic process	61	5.81506	2.22796e-06	NM_002193, NM_000268, NM_000168, NM_021964, NM_003284, NM_001170765, NM_002114, NM_007013, NM_014818, NM_006154, NM_001034914, NM_015898, NM_005603, NM_014112, NM_003489, NM_144653, NM_001077440, NM_015094, NM_005597, NM_007249, NM_012199, NM_006965, NM_001077261, NM_001145811, NM_004973, NM_015975, NM_004575, NM_001001928, NM_003068, NM_001171653, NM_003505, NM_001145097, NM_016120, NM_175061, N…
GO:0044265	cellular macromolecule catabolic process	61	5.81506	0.00266434	NM_001163315, NM_003350, NM_033274, NM_002486, NM_002945, NM_022041, NM_001080469, NM_007013, NM_017944, NM_017943, NM_006154, NM_018403, NM_001136115, NM_199423, NM_032268, NM_001111112, NM_001134223, NM_006537, NM_024646, NM_016172, NM_175748, NM_002911, NM_080678, NM_012199, NM_001167, NM_001085487, NM_003745, NM_020760, NM_005188, NM_001136031, NM_006768, NM_001079872, NM_005921, NM_001080481…
GO:0051254	positive regulation of RNA metabolic process	59	5.6244	6.08849e-08	NM_017420, NM_002486, NM_017617, NM_033502, NM_021964, NM_006940, NM_002586, NM_002309, NM_002943, NM_003108, NM_003107, NM_003822, NM_000124, NM_021003, NM_003489, NM_001001936, NM_004774, NM_004423, NM_005597, NM_000514, NM_007249, NM_001085487, NM_001172173, NM_001145811, NM_001126054, NM_006166, NM_005921, NM_004575, NM_001001928, NM_014048, NM_003709, NM_002657, NM_022455, NM_005359, NM_0059…
GO:0045893	positive regulation of transcription, DNA-dependent	57	5.43375	2.52846e-07	NM_017420, NM_017617, NM_033502, NM_021964, NM_006940, NM_002586, NM_002309, NM_002943, NM_003108, NM_003107, NM_003822, NM_021003, NM_003489, NM_001001936, NM_004774, NM_004423, NM_005597, NM_000514, NM_007249, NM_001085487, NM_001172173, NM_001126054, NM_001145811, NM_006166, NM_005921, NM_004575, NM_001001928, NM_014048, NM_003709, NM_002657, NM_022455, NM_005359, NM_005977, NM_005270, NM_0045…
GO:0045934	negative regulation of nucleobase, nucleoside, nucleotide and nucleic acid metabolic process	56	5.33842	5.25963e-06	NM_000268, NM_000168, NM_021964, NM_003284, NM_001170765, NM_002114, NM_007013, NM_014818, NM_006154, NM_001034914, NM_015898, NM_005603, NM_014112, NM_003489, NM_144653, NM_001077440, NM_015094, NM_005597, NM_007249, NM_006965, NM_001077261, NM_001145811, NM_004973, NM_015975, NM_004575, NM_001001928, NM_003068, NM_001171653, NM_003505, NM_001145097, NM_016120, NM_175061, NM_022455, NM_005359, N…
GO:0051172	negative regulation of nitrogen compound metabolic process	56	5.33842	7.91254e-06	NM_000268, NM_000168, NM_021964, NM_003284, NM_001170765, NM_002114, NM_007013, NM_014818, NM_006154, NM_001034914, NM_015898, NM_005603, NM_014112, NM_003489, NM_144653, NM_001077440, NM_015094, NM_005597, NM_007249, NM_006965, NM_001077261, NM_001145811, NM_004973, NM_015975, NM_004575, NM_001001928, NM_003068, NM_001171653, NM_003505, NM_001145097, NM_016120, NM_175061, NM_022455, NM_005359, N…
GO:0016481	negative regulation of transcription	54	5.14776	8.98234e-07	NM_000168, NM_021964, NM_003284, NM_001170765, NM_002114, NM_007013, NM_014818, NM_006154, NM_001034914, NM_015898, NM_005603, NM_014112, NM_003489, NM_144653, NM_001077440, NM_015094, NM_005597, NM_007249, NM_006965, NM_001077261, NM_001145811, NM_004973, NM_015975, NM_004575, NM_001001928, NM_003068, NM_001171653, NM_003505, NM_001145097, NM_016120, NM_175061, NM_022455, NM_005359, NM_005270, N…
GO:0046907	intracellular transport	54	5.14776	0.00765595	NM_004783, NM_002486, NM_000168, NM_005819, NM_032970, NM_006154, NM_014112, NM_022340, NM_024989, NM_012095, NM_032410, NM_012316, NM_002911, NM_004525, NM_001077269, NM_002264, NM_014252, NM_007190, NM_003916, NM_001007024, NM_004972, NM_014203, NM_003026, NM_002010, NM_001168407, NM_002270, NM_015026, NM_002271, NM_001163334, NM_014939, NM_020919, NM_007033, NM_080743, NM_001001433, NM_014938,…
GO:0030182	neuron differentiation	51	4.86177	2.55954e-06	NM_153487, NM_000168, NM_017617, NM_001024613, NM_006940, NM_145808, NM_002309, NM_002943, NM_003873, NM_003872, NM_006154, NM_001130916, NM_004442, NM_001142544, NM_000610, NM_000514, NM_000555, NM_080677, NM_001080744, NM_001143805, NM_001127671, NM_004972, NM_004575, NM_003162, NM_003709, NM_001005743, NM_001031680, NM_020919, NM_005359, NM_005270, NM_005076, NM_006763, NM_004496, NM_020796, N…
GO:0044093	positive regulation of molecular function	49	4.67112	0.00848521	NM_004783, NM_003188, NM_000267, NM_152405, NM_001752, NM_000369, NM_015367, NM_001118, NM_000124, NM_001130916, NM_000908, NM_001169117, NM_006572, NM_000514, NM_015270, NM_004720, NM_001080744, NM_001025242, NM_001127240, NM_004972, NM_139241, NM_001134398, NM_005921, NM_003647, NM_001171653, NM_003816, NM_005923, NM_002613, NM_020919, NM_001042555, NM_001166005, NM_138554, NM_004985, NM_001113…
GO:0043065	positive regulation of apoptosis	45	4.2898	0.000142761	NM_017617, NM_000267, NM_002657, NM_001031680, NM_152405, NM_001135733, NM_015225, NM_138554, NM_003107, NM_197956, NM_015367, NM_001113239, NM_000966, NM_000417, NM_004280, NM_003947, NM_000124, NM_000961, NM_001130916, NM_006738, NM_000963, NM_001077440, NM_014922, NM_000833, NM_000610, NM_001135155, NM_005633, NM_177551, NM_000633, NM_005871, NM_181358, NM_002745, NM_005400, NM_021999, NM_0014…
GO:0043068	positive regulation of programmed cell death	45	4.2898	0.000165303	NM_017617, NM_000267, NM_002657, NM_001031680, NM_152405, NM_001135733, NM_015225, NM_138554, NM_003107, NM_197956, NM_015367, NM_001113239, NM_000966, NM_000417, NM_004280, NM_003947, NM_000124, NM_000961, NM_001130916, NM_006738, NM_000963, NM_001077440, NM_014922, NM_000833, NM_000610, NM_001135155, NM_005633, NM_177551, NM_000633, NM_005871, NM_181358, NM_002745, NM_005400, NM_021999, NM_0014…
GO:0010942	positive regulation of cell death	45	4.2898	0.000184591	NM_017617, NM_000267, NM_002657, NM_001031680, NM_152405, NM_001135733, NM_015225, NM_138554, NM_003107, NM_197956, NM_015367, NM_001113239, NM_000966, NM_000417, NM_004280, NM_003947, NM_000124, NM_000961, NM_001130916, NM_006738, NM_000963, NM_001077440, NM_014922, NM_000833, NM_000610, NM_001135155, NM_005633, NM_177551, NM_000633, NM_005871, NM_181358, NM_002745, NM_005400, NM_021999, NM_0014…
GO:0048666	neuron development	42	4.00381	5.03718e-06	NM_003162, NM_003709, NM_017617, NM_001031680, NM_001024613, NM_001005743, NM_020919, NM_005270, NM_002309, NM_005076, NM_003873, NM_003872, NM_020796, NM_006154, NM_003947, NM_001145845, NM_001048209, NM_000109, NM_004442, NM_001142544, NM_000610, NM_001166252, NM_000514, NM_000633, NM_000555, NM_080677, NM_014926, NM_001080744, NM_001127671, NM_001143805, NM_170744, NM_001032221, NM_005909, NM_…
GO:0051253	negative regulation of RNA metabolic process	42	4.00381	2.47493e-05	NM_001145097, NM_021964, NM_175061, NM_022455, NM_001170765, NM_005359, NM_003284, NM_005270, NM_080743, NM_004992, NM_002114, NM_004496, NM_014818, NM_001113239, NM_006154, NM_001034914, NM_000966, NM_015898, NM_001131010, NM_014112, NM_015035, NM_003489, NM_015094, NM_005597, NM_001083893, NM_007249, NM_003036, NM_001145155, NM_001083962, NM_001077261, NM_006896, NM_001145811, NM_004973, NM_015…
GO:0030030	cell projection organization	42	4.00381	3.63095e-05	NM_003162, NM_003709, NM_017617, NM_001031680, NM_001024613, NM_001005743, NM_020919, NM_001730, NM_005270, NM_005076, NM_003873, NM_003872, NM_020796, NM_006154, NM_003947, NM_001145845, NM_000109, NM_004442, NM_000610, NM_001166252, NM_000514, NM_000633, NM_000555, NM_000210, NM_014926, NM_138383, NM_001127671, NM_001143805, NM_170744, NM_001032221, NM_005909, NM_004999, NM_000875, NM_015894, N…
GO:0045892	negative regulation of transcription, DNA-dependent	41	3.90848	3.73607e-05	NM_001145097, NM_021964, NM_175061, NM_022455, NM_001170765, NM_005359, NM_003284, NM_005270, NM_004992, NM_002114, NM_004496, NM_014818, NM_001113239, NM_006154, NM_001034914, NM_000966, NM_015898, NM_001131010, NM_014112, NM_015035, NM_003489, NM_015094, NM_005597, NM_001083893, NM_007249, NM_003036, NM_001145155, NM_001083962, NM_001077261, NM_006896, NM_001145811, NM_004973, NM_015975, NM_003…
GO:0045944	positive regulation of transcription from RNA polymerase II promoter	41	3.90848	9.29699e-05	NM_017420, NM_017617, NM_002657, NM_021964, NM_005359, NM_006940, NM_004555, NM_005270, NM_002586, NM_002309, NM_003108, NM_002943, NM_004496, NM_002229, NM_003822, NM_001113239, NM_000966, NM_003489, NM_004774, NM_005597, NM_001083893, NM_000514, NM_007249, NM_004898, NM_001455, NM_001172173, NM_006896, NM_001145811, NM_001126054, NM_015995, NM_004999, NM_178864, NM_001031804, NM_001015051, NM_0…
GO:0008284	positive regulation of cell proliferation	41	3.90848	0.000885458	NM_005584, NM_001042599, NM_017617, NM_002945, NM_000800, NM_001730, NM_005253, NM_004537, NM_001717, NM_005270, NM_001798, NM_002309, NM_000369, NM_003107, NM_003873, NM_004985, NM_001113239, NM_000417, NM_001130916, NM_020390, NM_000963, NM_005191, NM_144653, NM_001142544, NM_002524, NM_006206, NM_000633, NM_002009, NM_030661, NM_181358, NM_002745, NM_000678, NM_001127671, NM_006139, NM_000681,…
GO:0032268	regulation of cellular protein metabolic process	41	3.90848	0.00952914	NM_002486, NM_000268, NM_001142640, NM_005359, NM_002309, NM_145808, NM_152756, NM_138554, NM_052966, NM_001042559, NM_000599, NM_004849, NM_000124, NM_003134, NM_001130916, NM_020390, NM_005191, NM_001160423, NM_000633, NM_001024843, NM_002911, NM_001166345, NM_012199, NM_002745, NM_006775, NM_206853, NM_000212, NM_005400, NM_003745, NM_000115, NM_001136031, NM_000793, NM_006139, NM_016277, NM_0…
GO:0006928	cell motion	41	3.90848	0.00965198	NM_004783, NM_017420, NM_003709, NM_153487, NM_001901, NM_001031680, NM_001024613, NM_001039459, NM_003284, NM_005270, NM_005076, NM_003873, NM_003872, NM_002205, NM_020796, NM_003924, NM_001130916, NM_001145845, NM_000963, NM_001043351, NM_004442, NM_001145160, NM_006572, NM_000610, NM_000514, NM_002336, NM_001145155, NM_001018111, NM_000555, NM_001171137, NM_000210, NM_001143805, NM_170744, NM_…
GO:0031175	neuron projection development	36	3.43184	1.57852e-06	NM_003162, NM_003709, NM_017617, NM_001031680, NM_001024613, NM_001005743, NM_020919, NM_005270, NM_005076, NM_003873, NM_003872, NM_020796, NM_006154, NM_003947, NM_001145845, NM_000109, NM_004442, NM_000610, NM_001166252, NM_000514, NM_000633, NM_000555, NM_014926, NM_001143805, NM_001127671, NM_170744, NM_001032221, NM_005909, NM_004999, NM_000875, NM_004972, NM_015894, NM_002834, NM_004575, N…
GO:0032989	cellular component morphogenesis	36	3.43184	0.00775644	NM_003709, NM_017617, NM_001031680, NM_001024613, NM_001005743, NM_020919, NM_005270, NM_005076, NM_003873, NM_003872, NM_001130105, NM_020796, NM_003947, NM_001145845, NM_000109, NM_004442, NM_001166252, NM_000633, NM_000555, NM_001039469, NM_014926, NM_001143805, NM_001127671, NM_170744, NM_001032221, NM_001145811, NM_005909, NM_005159, NM_000875, NM_004972, NM_002834, NM_004575, NM_006162, NM_…
GO:0000902	cell morphogenesis	35	3.33651	0.00254976	NM_003709, NM_017617, NM_001031680, NM_001024613, NM_001005743, NM_020919, NM_005270, NM_005076, NM_003873, NM_003872, NM_001130105, NM_020796, NM_003947, NM_001145845, NM_000109, NM_004442, NM_001166252, NM_000633, NM_000555, NM_001039469, NM_014926, NM_001143805, NM_001127671, NM_170744, NM_001032221, NM_001145811, NM_005909, NM_004972, NM_000875, NM_002834, NM_004575, NM_006162, NM_001406, NM_…
GO:0000122	negative regulation of transcription from RNA polymerase II promoter	34	3.24118	2.48341e-05	NM_001145097, NM_021964, NM_175061, NM_022455, NM_001170765, NM_005270, NM_002114, NM_004992, NM_004496, NM_001113239, NM_006154, NM_001034914, NM_000966, NM_015898, NM_001131010, NM_003489, NM_005597, NM_001083893, NM_007249, NM_003036, NM_001145155, NM_001083962, NM_001077261, NM_006896, NM_001145811, NM_004973, NM_015975, NM_003357, NM_001145357, NM_001080424, NM_004575, NM_001001928, NM_00101…
GO:0051056	regulation of small GTPase mediated signal transduction	33	3.14585	2.05461e-05	NM_001164386, NM_000267, NM_001100398, NM_020919, NM_014990, NM_001134382, NM_152756, NM_004985, NM_001001669, NM_001143778, NM_003947, NM_006738, NM_014832, NM_004841, NM_012287, NM_004762, NM_002524, NM_020336, NM_004706, NM_005633, NM_004720, NM_022835, NM_145313, NM_001159944, NM_001039948, NM_014247, NM_015894, NM_139241, NM_001134398, NM_018071, NM_001144877, NM_005766, NM_001001132
GO:0048598	embryonic morphogenesis	33	3.14585	0.000815218	NM_003188, NM_017420, NM_000168, NM_017617, NM_000268, NM_000264, NM_022455, NM_005359, NM_005270, NM_001042555, NM_002586, NM_005523, NM_152230, NM_000966, NM_001130916, NM_001042371, NM_004774, NM_003036, NM_002336, NM_014053, NM_030661, NM_004700, NM_017780, NM_006769, NM_006896, NM_016277, NM_004999, NM_001098477, NM_002010, NM_018013, NM_004235, NM_001012426, NM_001171653
GO:0032990	cell part morphogenesis	32	3.05052	6.89429e-05	NM_003709, NM_017617, NM_001031680, NM_001024613, NM_001005743, NM_020919, NM_005270, NM_005076, NM_003873, NM_003872, NM_001130105, NM_020796, NM_003947, NM_001145845, NM_000109, NM_004442, NM_001166252, NM_000633, NM_000555, NM_014926, NM_001143805, NM_001127671, NM_170744, NM_001032221, NM_005909, NM_004972, NM_000875, NM_002834, NM_004575, NM_001406, NM_004852, NM_001407
GO:0051094	positive regulation of developmental process	32	3.05052	0.000310366	NM_000168, NM_017617, NM_001005743, NM_005359, NM_005270, NM_002309, NM_005523, NM_004496, NM_002229, NM_000575, NM_003924, NM_000417, NM_001134445, NM_002445, NM_001145845, NM_005191, NM_004442, NM_001123066, NM_004706, NM_000633, NM_001098416, NM_001455, NM_001143805, NM_005909, NM_058238, NM_004972, NM_001015051, NM_001135095, NM_004575, NM_002010, NM_014048, NM_003816
GO:0007167	enzyme linked receptor protein signaling pathway	32	3.05052	0.00810271	NM_003188, NM_001042599, NM_001901, NM_004439, NM_000800, NM_005359, NM_001042555, NM_002309, NM_003873, NM_001113239, NM_001118, NM_004962, NM_001130916, NM_012096, NM_004442, NM_001040712, NM_001142544, NM_006206, NM_003036, NM_005633, NM_002009, NM_001127671, NM_005188, NM_001025242, NM_004972, NM_017934, NM_000875, NM_002834, NM_005921, NM_001406, NM_002010, NM_003816
GO:0048858	cell projection morphogenesis	31	2.9552	7.31836e-05	NM_003709, NM_017617, NM_001031680, NM_001024613, NM_001005743, NM_020919, NM_005270, NM_005076, NM_003873, NM_003872, NM_020796, NM_003947, NM_001145845, NM_000109, NM_004442, NM_001166252, NM_000633, NM_000555, NM_014926, NM_001143805, NM_001127671, NM_170744, NM_001032221, NM_005909, NM_004972, NM_000875, NM_002834, NM_004575, NM_001406, NM_004852, NM_001407
GO:0006351	transcription, DNA-dependent	31	2.9552	0.00147827	NM_001145097, NM_001042603, NM_001031680, NM_001730, NM_001170765, NM_004555, NM_006940, NM_014892, NM_001011666, NM_000124, NM_002501, NM_014112, NM_004774, NM_004133, NM_005597, NM_001722, NM_018489, NM_007375, NM_001161572, NM_002126, NM_181356, NM_012384, NM_003601, NM_006769, NM_015995, NM_014423, NM_015975, NM_001031804, NM_012081, NM_006162, NM_001001928
GO:0032774	RNA biosynthetic process	31	2.9552	0.00181612	NM_001145097, NM_001042603, NM_001031680, NM_001730, NM_001170765, NM_004555, NM_006940, NM_014892, NM_001011666, NM_000124, NM_002501, NM_014112, NM_004774, NM_004133, NM_005597, NM_001722, NM_018489, NM_007375, NM_001161572, NM_002126, NM_181356, NM_012384, NM_003601, NM_006769, NM_015995, NM_014423, NM_015975, NM_001031804, NM_012081, NM_006162, NM_001001928
GO:0048812	neuron projection morphogenesis	30	2.85987	1.33063e-05	NM_003709, NM_017617, NM_001031680, NM_001024613, NM_001005743, NM_020919, NM_005270, NM_005076, NM_003873, NM_003872, NM_020796, NM_003947, NM_001145845, NM_000109, NM_004442, NM_001166252, NM_000633, NM_000555, NM_014926, NM_001143805, NM_001127671, NM_170744, NM_001032221, NM_005909, NM_004972, NM_000875, NM_002834, NM_004575, NM_001406, NM_001407
GO:0007264	small GTPase mediated signal transduction	30	2.85987	0.00537724	NM_021183, NM_004163, NM_001164386, NM_000267, NM_001039459, NM_004635, NM_004985, NM_152663, NM_016563, NM_138795, NM_002524, NM_006572, NM_016131, NM_004706, NM_005633, NM_005440, NM_014636, NM_002745, NM_001010942, NM_145313, NM_016277, NM_014247, NM_001135662, NM_002886, NM_000681, NM_001134398, NM_031296, NM_001001132, NM_001163380, NM_001037164
GO:0000904	cell morphogenesis involved in differentiation	29	2.76454	0.00037595	NM_003709, NM_017617, NM_001024613, NM_001005743, NM_001031680, NM_020919, NM_005270, NM_005076, NM_003873, NM_003872, NM_020796, NM_003947, NM_001145845, NM_004442, NM_001166252, NM_000633, NM_000555, NM_014926, NM_001143805, NM_170744, NM_001032221, NM_005909, NM_004972, NM_000875, NM_002834, NM_004575, NM_006162, NM_001406, NM_001407
GO:0007409	axonogenesis	28	2.66921	1.59619e-05	NM_003709, NM_017617, NM_001024613, NM_001005743, NM_001031680, NM_020919, NM_005270, NM_005076, NM_003873, NM_003872, NM_020796, NM_003947, NM_001145845, NM_004442, NM_001166252, NM_000633, NM_000555, NM_014926, NM_001143805, NM_170744, NM_001032221, NM_005909, NM_004972, NM_000875, NM_002834, NM_004575, NM_001406, NM_001407
GO:0048667	cell morphogenesis involved in neuron differentiation	28	2.66921	6.64865e-05	NM_003709, NM_017617, NM_001024613, NM_001005743, NM_001031680, NM_020919, NM_005270, NM_005076, NM_003873, NM_003872, NM_020796, NM_003947, NM_001145845, NM_004442, NM_001166252, NM_000633, NM_000555, NM_014926, NM_001143805, NM_170744, NM_001032221, NM_005909, NM_004972, NM_000875, NM_002834, NM_004575, NM_001406, NM_001407
GO:0006366	transcription from RNA polymerase II promoter	28	2.66921	0.000435359	NM_001145097, NM_001042603, NM_001031680, NM_001730, NM_001170765, NM_004555, NM_006940, NM_014892, NM_001011666, NM_000124, NM_002501, NM_014112, NM_004774, NM_004133, NM_005597, NM_018489, NM_007375, NM_001161572, NM_002126, NM_181356, NM_012384, NM_006769, NM_015995, NM_014423, NM_001031804, NM_012081, NM_006162, NM_001001928
GO:0033674	positive regulation of kinase activity	27	2.57388	0.000802908	NM_004783, NM_002613, NM_003188, NM_020919, NM_001042555, NM_004985, NM_000124, NM_001130916, NM_000838, NM_015270, NM_004720, NM_001166345, NM_000682, NM_001080744, NM_001025242, NM_000681, NM_004972, NM_139241, NM_002834, NM_001134398, NM_005921, NM_001130528, NM_003647, NM_006609, NM_003816, NM_001171653, NM_005923
GO:0051347	positive regulation of transferase activity	27	2.57388	0.00140667	NM_004783, NM_002613, NM_003188, NM_020919, NM_001042555, NM_004985, NM_000124, NM_001130916, NM_000838, NM_015270, NM_004720, NM_001166345, NM_000682, NM_001080744, NM_001025242, NM_000681, NM_004972, NM_139241, NM_002834, NM_001134398, NM_005921, NM_001130528, NM_003647, NM_006609, NM_003816, NM_001171653, NM_005923
GO:0016568	chromatin modification	27	2.57388	0.00831999	NM_001042603, NM_021946, NM_031413, NM_001098426, NM_001005366, NM_003284, NM_015557, NM_022455, NM_001012241, NM_001040158, NM_133334, NM_001146688, NM_032329, NM_015156, NM_001079514, NM_018489, NM_003482, NM_017780, NM_001098416, NM_001085487, NM_181356, NM_003601, NM_001112707, NM_001080424, NM_001270, NM_015695, NM_020382
GO:0046578	regulation of Ras protein signal transduction	26	2.47855	0.000438833	NM_000267, NM_020919, NM_001134382, NM_152756, NM_001001669, NM_004985, NM_001143778, NM_003947, NM_006738, NM_014832, NM_004762, NM_012287, NM_002524, NM_004706, NM_005633, NM_004720, NM_022835, NM_001159944, NM_001039948, NM_015894, NM_139241, NM_001134398, NM_018071, NM_001144877, NM_005766, NM_001001132
GO:0010608	posttranscriptional regulation of gene expression	26	2.47855	0.000471425	NM_002486, NM_024674, NM_001142640, NM_145808, NM_052966, NM_003107, NM_001042559, NM_000599, NM_003134, NM_001159675, NM_020390, NM_001160423, NM_000514, NM_001003810, NM_000633, NM_001024843, NM_002911, NM_012199, NM_006775, NM_206853, NM_002745, NM_006887, NM_001419, NM_000793, NM_006139, NM_024852, NM_003357
GO:0045860	positive regulation of protein kinase activity	26	2.47855	0.00106249	NM_004783, NM_002613, NM_003188, NM_020919, NM_001042555, NM_004985, NM_000124, NM_001130916, NM_000838, NM_015270, NM_001166345, NM_004720, NM_000682, NM_001080744, NM_001025242, NM_000681, NM_004972, NM_139241, NM_002834, NM_005921, NM_001130528, NM_003647, NM_006609, NM_003816, NM_001171653, NM_005923
GO:0045597	positive regulation of cell differentiation	26	2.47855	0.00154699	NM_017617, NM_000168, NM_001005743, NM_005359, NM_005270, NM_002309, NM_005523, NM_004496, NM_002229, NM_003924, NM_000417, NM_002445, NM_001145845, NM_005191, NM_004442, NM_001123066, NM_004706, NM_000633, NM_001455, NM_001143805, NM_005909, NM_004972, NM_058238, NM_001015051, NM_001135095, NM_004575
GO:0010627	regulation of protein kinase cascade	26	2.47855	0.00473691	NM_004783, NM_003188, NM_000268, NM_000267, NM_002309, NM_152756, NM_001752, NM_138554, NM_001113239, NM_006154, NM_000124, NM_021003, NM_001130916, NM_000838, NM_001166345, NM_004720, NM_003745, NM_015336, NM_004972, NM_139241, NM_005921, NM_001001132, NM_006609, NM_002010, NM_001171653, NM_005923
GO:0001568	blood vessel development	25	2.38322	0.00752538	NM_003188, NM_000088, NM_017617, NM_001901, NM_000267, NM_000800, NM_015836, NM_001730, NM_001795, NM_019074, NM_003873, NM_003872, NM_002229, NM_004849, NM_001130916, NM_001145845, NM_006572, NM_000610, NM_001145155, NM_030661, NM_006775, NM_206853, NM_000682, NM_017780, NM_002010, NM_014048
GO:0007507	heart development	24	2.28789	0.00303198	NM_004423, NM_033274, NM_022051, NM_001042599, NM_000168, NM_017617, NM_000267, NM_000264, NM_005270, NM_004555, NM_017780, NM_003873, NM_003107, NM_003872, NM_001130105, NM_001145811, NM_005159, NM_004849, NM_001130916, NM_020778, NM_006162, NM_001012426, NM_014048, NM_004774
GO:0045596	negative regulation of cell differentiation	24	2.28789	0.00321477	NM_004706, NM_000168, NM_017617, NM_000267, NM_004414, NM_003036, NM_024674, NM_002745, NM_005270, NM_005977, NM_000212, NM_001098416, NM_002309, NM_138554, NM_003873, NM_001143805, NM_006896, NM_003924, NM_002485, NM_001130916, NM_001001928, NM_004442, NM_001170701, NM_004235
GO:0035295	tube development	24	2.28789	0.00404136	NM_006206, NM_003188, NM_006572, NM_000610, NM_001901, NM_000168, NM_017617, NM_000514, NM_000633, NM_000800, NM_002009, NM_000264, NM_005359, NM_005270, NM_003873, NM_005523, NM_001143805, NM_152230, NM_004496, NM_006769, NM_001130916, NM_002010, NM_004774, NM_001171653
GO:0000165	MAPKKK cascade	23	2.19256	0.000892111	NM_004783, NM_003188, NM_000267, NM_000838, NM_002749, NM_001166345, NM_004720, NM_002745, NM_001042555, NM_000682, NM_014247, NM_000681, NM_004972, NM_002834, NM_139241, NM_000124, NM_005921, NM_001130916, NM_006549, NM_001130528, NM_006609, NM_005923, NM_003816
GO:0051270	regulation of cell motion	23	2.19256	0.00166993	NM_006206, NM_006572, NM_001042599, NM_000268, NM_000267, NM_014909, NM_000633, NM_002745, NM_000212, NM_001098416, NM_019074, NM_007011, NM_003873, NM_000599, NM_004972, NM_000875, NM_198551, NM_001130916, NM_005921, NM_001144877, NM_001130528, NM_004852, NM_003816
GO:0040012	regulation of locomotion	22	2.09724	0.00346692	NM_006206, NM_006572, NM_001042599, NM_000268, NM_000267, NM_014909, NM_000633, NM_002745, NM_000212, NM_001098416, NM_019074, NM_000369, NM_007011, NM_000599, NM_004972, NM_198551, NM_000875, NM_005921, NM_001144877, NM_001130528, NM_004852, NM_003816
GO:0030334	regulation of cell migration	21	2.00191	0.00169859	NM_006206, NM_006572, NM_001042599, NM_000268, NM_000267, NM_014909, NM_000633, NM_002745, NM_000212, NM_001098416, NM_019074, NM_007011, NM_000599, NM_004972, NM_000875, NM_198551, NM_005921, NM_001144877, NM_001130528, NM_004852, NM_003816
GO:0048729	tissue morphogenesis	21	2.00191	0.00357328	NM_003188, NM_000088, NM_000610, NM_000268, NM_017617, NM_000168, NM_001031680, NM_000633, NM_002009, NM_000264, NM_005359, NM_005270, NM_005985, NM_005523, NM_152230, NM_006769, NM_005159, NM_001098477, NM_004235, NM_001171653, NM_001042371
GO:0003002	regionalization	21	2.00191	0.00963197	NM_017617, NM_001040167, NM_000168, NM_002336, NM_004529, NM_001145155, NM_030661, NM_000264, NM_181358, NM_005359, NM_005270, NM_001042555, NM_002586, NM_006763, NM_005523, NM_006896, NM_001113239, NM_016277, NM_001130916, NM_001098477, NM_001171653
GO:0001932	regulation of protein amino acid phosphorylation	20	1.90658	0.00504561	NM_000268, NM_000633, NM_001166345, NM_005359, NM_005400, NM_152756, NM_002309, NM_138554, NM_052966, NM_003745, NM_000115, NM_004972, NM_139241, NM_000124, NM_005921, NM_001130916, NM_005191, NM_006609, NM_005923, NM_001171653
GO:0045165	cell fate commitment	19	1.81125	0.00101753	NM_002653, NM_001042599, NM_017617, NM_000514, NM_000168, NM_001145155, NM_000633, NM_000800, NM_005359, NM_005270, NM_006940, NM_001042555, NM_005523, NM_004496, NM_001145811, NM_001015051, NM_001130916, NM_004852, NM_004235
GO:0043408	regulation of MAPKKK cascade	17	1.62059	0.000481515	NM_004783, NM_003188, NM_000268, NM_000267, NM_000838, NM_001166345, NM_004720, NM_002309, NM_138554, NM_001113239, NM_139241, NM_000124, NM_005921, NM_006609, NM_002010, NM_001171653, NM_005923
GO:0045664	regulation of neuron differentiation	17	1.62059	0.00401721	NM_001123066, NM_004706, NM_017617, NM_001005743, NM_000633, NM_005270, NM_005977, NM_006940, NM_003873, NM_001143805, NM_004496, NM_005909, NM_003924, NM_003947, NM_002485, NM_001145845, NM_004442
GO:0006417	regulation of translation	17	1.62059	0.00537024	NM_002486, NM_001024843, NM_002911, NM_001142640, NM_012199, NM_002745, NM_206853, NM_006775, NM_145808, NM_052966, NM_001042559, NM_000599, NM_000793, NM_006139, NM_024852, NM_003134, NM_020390, NM_001160423
GO:0009952	anterior/posterior pattern formation	17	1.62059	0.00661064	NM_017617, NM_001040167, NM_000168, NM_002336, NM_004529, NM_001145155, NM_030661, NM_181358, NM_005359, NM_001042555, NM_006763, NM_005523, NM_006896, NM_001113239, NM_001130916, NM_001098477, NM_001171653
GO:0035023	regulation of Rho protein signal transduction	16	1.52526	0.000508097	NM_004706, NM_005633, NM_004720, NM_020919, NM_152756, NM_022835, NM_001001669, NM_015894, NM_139241, NM_003947, NM_001134398, NM_018071, NM_006738, NM_001144877, NM_005766, NM_001001132
GO:0043406	positive regulation of MAP kinase activity	15	1.42993	0.00205341	NM_000838, NM_001166345, NM_004720, NM_001042555, NM_000682, NM_004985, NM_000681, NM_139241, NM_002834, NM_000124, NM_005921, NM_001130528, NM_006609, NM_001171653, NM_005923
GO:0048736	appendage development	15	1.42993	0.00225399	NM_002653, NM_017617, NM_000168, NM_002336, NM_003036, NM_014053, NM_001145155, NM_000264, NM_017780, NM_002586, NM_005523, NM_016277, NM_000966, NM_002010, NM_004774
GO:0060173	limb development	15	1.42993	0.00225399	NM_002653, NM_017617, NM_000168, NM_002336, NM_003036, NM_014053, NM_001145155, NM_000264, NM_017780, NM_002586, NM_005523, NM_016277, NM_000966, NM_002010, NM_004774
GO:0035108	limb morphogenesis	14	1.3346	0.00431453	NM_002653, NM_017617, NM_000168, NM_002336, NM_003036, NM_014053, NM_000264, NM_017780, NM_002586, NM_005523, NM_016277, NM_000966, NM_002010, NM_004774
GO:0035107	appendage morphogenesis	14	1.3346	0.00431453	NM_002653, NM_017617, NM_000168, NM_002336, NM_003036, NM_014053, NM_000264, NM_017780, NM_002586, NM_005523, NM_016277, NM_000966, NM_002010, NM_004774
GO:0000187	activation of MAPK activity	13	1.23928	0.00242912	NM_000838, NM_004720, NM_001166345, NM_001042555, NM_000682, NM_000681, NM_139241, NM_002834, NM_000124, NM_005921, NM_001130528, NM_006609, NM_005923
GO:0048589	developmental growth	13	1.23928	0.00400389	NM_017617, NM_000168, NM_000633, NM_000555, NM_005270, NM_145808, NM_001455, NM_005523, NM_000599, NM_001482, NM_002485, NM_000963, NM_004575
GO:0030326	embryonic limb morphogenesis	13	1.23928	0.00400389	NM_017617, NM_000168, NM_002336, NM_003036, NM_014053, NM_000264, NM_017780, NM_002586, NM_005523, NM_016277, NM_000966, NM_002010, NM_004774
GO:0035113	embryonic appendage morphogenesis	13	1.23928	0.00400389	NM_017617, NM_000168, NM_002336, NM_003036, NM_014053, NM_000264, NM_017780, NM_002586, NM_005523, NM_016277, NM_000966, NM_002010, NM_004774
GO:0007160	cell-matrix adhesion	13	1.23928	0.00482739	NM_004783, NM_002613, NM_000610, NM_001901, NM_015719, NM_000633, NM_000210, NM_002214, NM_000212, NM_005076, NM_002508, NM_003816, NM_001130103
GO:0046328	regulation of JNK cascade	11	1.04862	0.00376663	NM_003188, NM_004783, NM_001113239, NM_139241, NM_001166345, NM_000124, NM_005921, NM_006609, NM_138554, NM_001171653, NM_005923
GO:0031099	regeneration	11	1.04862	0.00582313	NM_005909, NM_017617, NM_000633, NM_001482, NM_004972, NM_004525, NM_001130916, NM_002309, NM_145808, NM_003745, NM_001127671
GO:0070302	regulation of stress-activated protein kinase signaling pathway	11	1.04862	0.00582313	NM_003188, NM_004783, NM_001113239, NM_139241, NM_001166345, NM_000124, NM_005921, NM_006609, NM_138554, NM_001171653, NM_005923
GO:0001763	morphogenesis of a branching structure	11	1.04862	0.0095185	NM_006572, NM_000610, NM_017617, NM_000168, NM_000633, NM_005359, NM_005270, NM_003873, NM_005523, NM_004496, NM_001130103

## Sheet: Table S5-2
Table S5. Predicted GO analysis targeted by differentially expressed miRNAs (Molecular Function).
GO Accession	GO Terms	gene count	PERCENT(%)	PValue	Genbank ID
GO:0043167	ion binding	282	26.8827	0.00627748	NM_003149, NM_021260, NM_033502, NM_001717, NM_003247, NM_002390, NM_002587, NM_001080475, NM_014155, NM_014415, NM_001034914, NM_015898, NM_014293, NM_005603, NM_006738, NM_001130916, NM_022340, NM_007345, NM_018660, NM_001080470, NM_001031717, NM_005896, NM_152787, NM_001169117, NM_013302, NM_198513, NM_013309, NM_003747, NM_001080485, NM_139241, NM_001134398, NM_024490, NM_021072, NM_001104631…
GO:0046872	metal ion binding	278	26.5014	0.00383294	NM_003149, NM_021260, NM_033502, NM_001717, NM_003247, NM_002390, NM_002587, NM_001080475, NM_014155, NM_014415, NM_001034914, NM_015898, NM_014293, NM_005603, NM_006738, NM_001130916, NM_022340, NM_007345, NM_018660, NM_001080470, NM_001031717, NM_005896, NM_152787, NM_001169117, NM_013302, NM_198513, NM_013309, NM_003747, NM_001080485, NM_139241, NM_001134398, NM_024490, NM_021072, NM_001104631…
GO:0043169	cation binding	278	26.5014	0.00665197	NM_003149, NM_021260, NM_033502, NM_001717, NM_003247, NM_002390, NM_002587, NM_001080475, NM_014155, NM_014415, NM_001034914, NM_015898, NM_014293, NM_005603, NM_006738, NM_001130916, NM_022340, NM_007345, NM_018660, NM_001080470, NM_001031717, NM_005896, NM_152787, NM_001169117, NM_013302, NM_198513, NM_013309, NM_003747, NM_001080485, NM_139241, NM_001134398, NM_024490, NM_021072, NM_001104631…
GO:0046914	transition metal ion binding	196	18.6845	0.00281556	NM_003149, NM_021260, NM_033502, NM_001717, NM_002390, NM_001080475, NM_014155, NM_014415, NM_015898, NM_001130916, NM_006738, NM_022340, NM_018660, NM_007345, NM_005896, NM_001080470, NM_152787, NM_198513, NM_013309, NM_003747, NM_001080485, NM_139241, NM_001134398, NM_003647, NM_001080481, NM_016120, NM_001163334, NM_022455, NM_005977, NM_017637, NM_003474, NM_006315, NM_017824, NM_014437, NM_0…
GO:0003677	DNA binding	186	17.7312	3.80434e-06	NM_000901, NM_000168, NM_033502, NM_033067, NM_001170765, NM_006940, NM_001717, NM_014729, NM_002586, NM_002114, NM_001142548, NM_014155, NM_001034914, NM_014415, NM_015898, NM_018181, NM_032827, NM_002501, NM_018660, NM_133334, NM_007345, NM_015094, NM_004774, NM_001080470, NM_001722, NM_007249, NM_001171137, NM_002911, NM_001161572, NM_017780, NM_001085487, NM_001077261, NM_001080485, NM_002853…
GO:0008270	zinc ion binding	178	16.9685	5.41689e-05	NM_000901, NM_144982, NM_033274, NM_003149, NM_021260, NM_000168, NM_033502, NM_033067, NM_001159770, NM_001717, NM_002114, NM_002390, NM_001080475, NM_014155, NM_001143778, NM_014415, NM_015898, NM_018181, NM_006738, NM_022340, NM_018700, NM_018660, NM_032268, NM_133334, NM_007345, NM_015094, NM_001080470, NM_152787, NM_006537, NM_007249, NM_175748, NM_002911, NM_198513, NM_001167, NM_005400, NM…
GO:0030528	transcription regulator activity	141	13.4414	1.4421e-08	NM_000901, NM_000168, NM_033502, NM_033067, NM_001170765, NM_006940, NM_001717, NM_002586, NM_002114, NM_001034914, NM_015898, NM_032827, NM_002501, NM_144653, NM_007345, NM_004774, NM_007249, NM_001161572, NM_015215, NM_001085487, NM_001077261, NM_005686, NM_004973, NM_015975, NM_006874, NM_004575, NM_015083, NM_022062, NM_003709, NM_001145097, NM_001042603, NM_016120, NM_002466, NM_001098426, N…
GO:0003700	transcription factor activity	95	9.05624	8.56962e-07	NM_000901, NM_017420, NM_003205, NM_017617, NM_000168, NM_033502, NM_021964, NM_033067, NM_001170765, NM_006940, NM_005253, NM_001717, NM_002586, NM_004535, NM_003108, NM_002943, NM_003107, NM_001136154, NM_147190, NM_003822, NM_003924, NM_002501, NM_014112, NM_007345, NM_005597, NM_007249, NM_001161572, NM_006965, NM_006769, NM_005188, NM_005686, NM_001172173, NM_001145811, NM_006874, NM_006166,…
GO:0004672	protein kinase activity	59	5.6244	0.000146763	NM_003188, NM_004783, NM_001396, NM_004439, NM_004635, NM_003873, NM_003872, NM_014911, NM_001130105, NM_001130916, NM_006738, NM_020778, NM_004442, NM_001002838, NM_001006932, NM_013302, NM_001039469, NM_005400, NM_001128628, NM_001025242, NM_001126054, NM_004972, NM_001112707, NM_005921, NM_001221, NM_015083, NM_005923, NM_002613, NM_001042599, NM_001798, NM_024776, NM_017771, NM_030952, NM_001…
GO:0043565	sequence-specific DNA binding	56	5.33842	0.000834234	NM_000901, NM_017420, NM_017617, NM_000168, NM_003205, NM_021964, NM_005253, NM_002586, NM_002943, NM_001136154, NM_147190, NM_003822, NM_003924, NM_002501, NM_014112, NM_001161572, NM_005686, NM_001145811, NM_006874, NM_006166, NM_004575, NM_006162, NM_001001928, NM_001171653, NM_002653, NM_022062, NM_005359, NM_005270, NM_005523, NM_001134285, NM_004496, NM_001011666, NM_002229, NM_000966, NM_0…
GO:0008092	cytoskeletal protein binding	46	4.38513	0.00318042	NM_022062, NM_005112, NM_000268, NM_152405, NM_031412, NM_001080529, NM_012307, NM_001166005, NM_001121, NM_001103184, NM_017771, NM_003389, NM_020850, NM_001166160, NM_001008493, NM_001043351, NM_001145160, NM_000109, NM_138795, NM_032410, NM_001123066, NM_033389, NM_000259, NM_000555, NM_207577, NM_007375, NM_080677, NM_001077269, NM_001037954, NM_006148, NM_001145319, NM_006888, NM_138383, NM_…
GO:0019899	enzyme binding	46	4.38513	0.00619185	NM_003162, NM_002613, NM_004888, NM_001168407, NM_001145097, NM_012301, NM_001164386, NM_002271, NM_020919, NM_001163334, NM_000663, NM_001795, NM_001121, NM_138554, NM_001126060, NM_006154, NM_020850, NM_015898, NM_001130916, NM_001100117, NM_012096, NM_000109, NM_003489, NM_001111112, NM_014922, NM_001123066, NM_001083893, NM_003036, NM_000633, NM_001037293, NM_002745, NM_005400, NM_003745, NM_…
GO:0019904	protein domain specific binding	42	4.00381	4.50675e-06	NM_003162, NM_033274, NM_001039459, NM_001080529, NM_080743, NM_004992, NM_003474, NM_001134285, NM_014892, NM_001126060, NM_004985, NM_006154, NM_001008493, NM_001135699, NM_000109, NM_001001936, NM_001987, NM_014922, NM_001123066, NM_001083893, NM_005633, NM_003036, NM_001042486, NM_000633, NM_004720, NM_004525, NM_000684, NM_006775, NM_206853, NM_001024666, NM_006888, NM_138383, NM_005188, NM_…
GO:0004674	protein serine/threonine kinase activity	41	3.90848	0.00259117	NM_002613, NM_003188, NM_004783, NM_001396, NM_001798, NM_004635, NM_014911, NM_030952, NM_001113239, NM_003947, NM_001031812, NM_014840, NM_001130916, NM_006738, NM_020778, NM_001002838, NM_001006932, NM_013302, NM_002749, NM_015016, NM_001039469, NM_013233, NM_181358, NM_002745, NM_005400, NM_001128628, NM_001004106, NM_198465, NM_031464, NM_001126054, NM_001025242, NM_001112707, NM_033550, NM_…
GO:0060589	nucleoside-triphosphatase regulator activity	39	3.71783	0.00394066	NM_001168407, NM_001164386, NM_000267, NM_152392, NM_001100398, NM_002271, NM_020919, NM_001163334, NM_014990, NM_001134382, NM_152756, NM_001001669, NM_001143778, NM_020850, NM_152663, NM_003947, NM_001100117, NM_006738, NM_014832, NM_004841, NM_012287, NM_004762, NM_020336, NM_004706, NM_005633, NM_001042758, NM_014636, NM_001135608, NM_198465, NM_145313, NM_022835, NM_001159944, NM_001039948, …
GO:0030695	GTPase regulator activity	38	3.6225	0.00476514	NM_001168407, NM_001164386, NM_000267, NM_001100398, NM_002271, NM_020919, NM_001163334, NM_014990, NM_001134382, NM_152756, NM_001001669, NM_001143778, NM_020850, NM_152663, NM_003947, NM_001100117, NM_006738, NM_014832, NM_004841, NM_012287, NM_004762, NM_020336, NM_004706, NM_005633, NM_001042758, NM_014636, NM_001135608, NM_198465, NM_145313, NM_022835, NM_001159944, NM_001039948, NM_014247, …
GO:0016564	transcription repressor activity	34	3.24118	0.000934919	NM_001145097, NM_021964, NM_175061, NM_016120, NM_022455, NM_002114, NM_004992, NM_014818, NM_002229, NM_001113239, NM_001034914, NM_015898, NM_014112, NM_003489, NM_144653, NM_001077440, NM_001083893, NM_007249, NM_003036, NM_001145155, NM_022893, NM_001039618, NM_001083962, NM_006965, NM_001077261, NM_006896, NM_004973, NM_015975, NM_006874, NM_001145357, NM_001144877, NM_001012426, NM_004235, …
GO:0003779	actin binding	32	3.05052	0.00537358	NM_005112, NM_022062, NM_152405, NM_001080529, NM_012307, NM_001166005, NM_001121, NM_001103184, NM_017771, NM_003389, NM_001166160, NM_001008493, NM_000109, NM_001043351, NM_001145160, NM_033389, NM_000259, NM_001077269, NM_001037954, NM_006148, NM_001145319, NM_138383, NM_005909, NM_001142885, NM_004999, NM_139241, NM_001048183, NM_014547, NM_001080779, NM_002356, NM_014048, NM_001003407
GO:0005083	small GTPase regulator activity	28	2.66921	0.00575208	NM_001168407, NM_000267, NM_001163334, NM_020919, NM_001134382, NM_001001669, NM_001143778, NM_020850, NM_003947, NM_001100117, NM_006738, NM_014832, NM_004841, NM_012287, NM_004762, NM_004706, NM_005633, NM_001135608, NM_198465, NM_022835, NM_001159944, NM_001039948, NM_014247, NM_139241, NM_001134398, NM_018071, NM_005766, NM_001001132
GO:0003702	RNA polymerase II transcription factor activity	25	2.38322	0.00909875	NM_003205, NM_033502, NM_021964, NM_001730, NM_001170765, NM_003822, NM_002229, NM_001048201, NM_013320, NM_002501, NM_144633, NM_004774, NM_001145155, NM_018489, NM_181356, NM_003601, NM_012384, NM_015995, NM_001031804, NM_001015051, NM_012081, NM_001001928, NM_004852, NM_004235, NM_015083
GO:0032403	protein complex binding	22	2.09724	0.0055411	NM_002613, NM_003162, NM_001083893, NM_001901, NM_012301, NM_000210, NM_001042555, NM_000212, NM_002390, NM_007038, NM_002205, NM_019105, NM_005909, NM_016351, NM_000875, NM_017934, NM_002834, NM_014293, NM_000124, NM_001130916, NM_001135699, NM_003816
GO:0005085	guanyl-nucleotide exchange factor activity	21	2.00191	0.000573712	NM_004706, NM_001164386, NM_005633, NM_020919, NM_014636, NM_001134382, NM_152756, NM_022835, NM_145313, NM_001001669, NM_014247, NM_020850, NM_152663, NM_003947, NM_139241, NM_001134398, NM_018071, NM_006738, NM_005766, NM_001001132, NM_004762
GO:0003714	transcription corepressor activity	19	1.81125	0.00206843	NM_001145097, NM_007249, NM_003036, NM_001145155, NM_022893, NM_016120, NM_175061, NM_022455, NM_004992, NM_001083962, NM_001077261, NM_002229, NM_001113239, NM_001034914, NM_015975, NM_001145357, NM_001144877, NM_003489, NM_020382
GO:0003682	chromatin binding	18	1.71592	0.00689777	NM_002945, NM_017617, NM_000168, NM_002911, NM_022455, NM_015557, NM_005270, NM_004555, NM_017780, NM_002586, NM_001040158, NM_003601, NM_001015051, NM_000124, NM_004575, NM_153366, NM_001270, NM_004774
GO:0017124	SH3 domain binding	16	1.52526	0.000448107	NM_033274, NM_001123066, NM_005633, NM_001039459, NM_001080529, NM_004525, NM_206853, NM_006775, NM_001024666, NM_003474, NM_138383, NM_005188, NM_005864, NM_001008493, NM_001001936, NM_005436, NM_003816
GO:0005088	Ras guanyl-nucleotide exchange factor activity	14	1.3346	0.00178854	NM_004706, NM_005633, NM_020919, NM_022835, NM_001001669, NM_014247, NM_020850, NM_139241, NM_003947, NM_001134398, NM_018071, NM_006738, NM_005766, NM_001001132
GO:0005089	Rho guanyl-nucleotide exchange factor activity	12	1.14395	0.00373688	NM_022835, NM_001001669, NM_004706, NM_005633, NM_003947, NM_139241, NM_001134398, NM_020919, NM_018071, NM_006738, NM_005766, NM_001001132

## Sheet: Table S5-3
Table S5. Predicted GO analysis targeted by differentially expressed miRNAs (Cellular Component).
GO Accession	GO Terms	gene count	PERCENT(%)	PValue	Genbank ID
GO:0044459	plasma membrane part	148	14.1087	0.000863008	NM_176877, NM_000268, NM_000264, NM_013231, NM_000369, NM_002587, NM_002205, NM_198721, NM_000417, NM_001166160, NM_001136257, NM_005603, NM_021003, NM_001130916, NM_022340, NM_032268, NM_005898, NM_018992, NM_001130103, NM_016131, NM_130847, NM_000610, NM_016548, NM_000813, NM_002214, NM_000810, NM_001024666, NM_000615, NM_000719, NM_001127671, NM_012064, NM_004979, NM_016277, NM_004972, NM_0142…
GO:0031974	membrane-enclosed lumen	128	12.2021	0.000802167	NM_002486, NM_000268, NM_000168, NM_001013438, NM_000800, NM_002586, NM_003247, NM_017990, NM_014415, NM_001042533, NM_018181, NM_001159675, NM_144653, NM_018086, NM_004774, NM_001722, NM_001006932, NM_001077269, NM_206853, NM_001005353, NM_001024666, NM_001077261, NM_019589, NM_001080485, NM_001482, NM_004972, NM_015975, NM_002515, NM_015083, NM_001080779, NM_001146699, NM_001042603, NM_015836, …
GO:0043233	organelle lumen	124	11.8208	0.0015727	NM_002486, NM_000268, NM_000168, NM_001013438, NM_000800, NM_002586, NM_003247, NM_017990, NM_014415, NM_001042533, NM_018181, NM_001159675, NM_144653, NM_018086, NM_004774, NM_001722, NM_001006932, NM_001077269, NM_206853, NM_001005353, NM_001024666, NM_001077261, NM_019589, NM_001080485, NM_004972, NM_015975, NM_002515, NM_015083, NM_001080779, NM_001146699, NM_001042603, NM_015836, NM_016120, …
GO:0070013	intracellular organelle lumen	123	11.7255	0.000976187	NM_002486, NM_000268, NM_000168, NM_001013438, NM_000800, NM_002586, NM_017990, NM_014415, NM_001042533, NM_018181, NM_001159675, NM_144653, NM_018086, NM_004774, NM_001722, NM_001006932, NM_001077269, NM_206853, NM_001005353, NM_001024666, NM_001077261, NM_019589, NM_001080485, NM_004972, NM_015975, NM_002515, NM_015083, NM_001080779, NM_001146699, NM_001042603, NM_015836, NM_016120, NM_002271, …
GO:0031981	nuclear lumen	112	10.6768	2.31973e-05	NM_002486, NM_000268, NM_000168, NM_001013438, NM_000800, NM_002586, NM_014415, NM_001042533, NM_018181, NM_001159675, NM_144653, NM_018086, NM_004774, NM_001722, NM_001006932, NM_001077269, NM_206853, NM_001024666, NM_001077261, NM_019589, NM_001080485, NM_004972, NM_015975, NM_002515, NM_015083, NM_001080779, NM_001146699, NM_001042603, NM_016120, NM_002271, NM_001005366, NM_005359, NM_005977, …
GO:0000267	cell fraction	76	7.245	0.00772746	NM_003149, NM_012301, NM_005819, NM_002205, NM_003872, NM_147190, NM_006154, NM_001171184, NM_001166160, NM_021003, NM_001159675, NM_000124, NM_001146158, NM_005603, NM_006738, NM_012096, NM_000908, NM_005896, NM_001042371, NM_021959, NM_001042486, NM_015270, NM_004525, NM_001024666, NM_003747, NM_000719, NM_012064, NM_001126054, NM_004972, NM_005921, NM_032242, NM_001001132, NM_001104631, NM_020…
GO:0005626	insoluble fraction	66	6.29171	0.00097457	NM_012301, NM_005819, NM_002205, NM_003872, NM_147190, NM_006154, NM_001171184, NM_001166160, NM_001159675, NM_001146158, NM_005603, NM_021003, NM_006738, NM_012096, NM_000908, NM_001042371, NM_001042486, NM_015270, NM_004525, NM_001024666, NM_003747, NM_000719, NM_012064, NM_001126054, NM_004972, NM_005921, NM_032242, NM_001104631, NM_001001132, NM_020655, NM_001423, NM_001042494, NM_015576, NM_…
GO:0005794	Golgi apparatus	65	6.19638	0.00393731	NM_020440, NM_004163, NM_021260, NM_130809, NM_017617, NM_001128826, NM_021964, NM_005819, NM_005715, NM_001008660, NM_001752, NM_001130105, NM_001034914, NM_020772, NM_018181, NM_001136257, NM_012095, NM_004776, NM_032410, NM_016131, NM_080670, NM_016548, NM_000610, NM_207577, NM_002009, NM_004525, NM_024787, NM_021999, NM_003747, NM_001007024, NM_001039948, NM_003916, NM_139241, NM_014203, NM_0…
GO:0005624	membrane fraction	64	6.10105	0.0010382	NM_012301, NM_005819, NM_002205, NM_003872, NM_147190, NM_006154, NM_001171184, NM_001166160, NM_001159675, NM_001146158, NM_005603, NM_021003, NM_006738, NM_012096, NM_000908, NM_001042371, NM_001042486, NM_015270, NM_004525, NM_001024666, NM_003747, NM_000719, NM_012064, NM_001126054, NM_004972, NM_005921, NM_032242, NM_001001132, NM_020655, NM_001423, NM_001042494, NM_015576, NM_020919, NM_005…
GO:0005654	nucleoplasm	64	6.10105	0.00764687	NM_002486, NM_001396, NM_000168, NM_002945, NM_003205, NM_002586, NM_003389, NM_001112, NM_001159675, NM_000124, NM_012096, NM_003489, NM_144653, NM_004774, NM_001722, NM_001006932, NM_003482, NM_005871, NM_002264, NM_006769, NM_003601, NM_019589, NM_001077261, NM_015975, NM_006166, NM_006425, NM_014706, NM_001080779, NM_015083, NM_016120, NM_175061, NM_005359, NM_005977, NM_080743, NM_001798, NM…
GO:0005730	nucleolus	60	5.71973	0.000193562	NM_000168, NM_000268, NM_021964, NM_001013438, NM_000800, NM_005253, NM_001105539, NM_003108, NM_001112, NM_014415, NM_001042533, NM_018181, NM_000124, NM_001077446, NM_016172, NM_194247, NM_014906, NM_001017916, NM_018959, NM_001077269, NM_206853, NM_006775, NM_001024666, NM_003601, NM_001077261, NM_001080485, NM_001172173, NM_002515, NM_001005404, NM_001080779, NM_002653, NM_001146699, NM_02467…
GO:0044451	nucleoplasm part	47	4.48046	0.00146015	NM_001396, NM_000168, NM_003205, NM_002945, NM_175061, NM_016120, NM_005359, NM_005977, NM_002586, NM_001798, NM_005523, NM_001113239, NM_003389, NM_000966, NM_000124, NM_012096, NM_003489, NM_144653, NM_004774, NM_032329, NM_001722, NM_003036, NM_004898, NM_003482, NM_005871, NM_181358, NM_001098416, NM_014614, NM_181356, NM_001083962, NM_006769, NM_019589, NM_001077261, NM_020748, NM_004999, NM…
GO:0030054	cell junction	44	4.19447	0.0019816	NM_003162, NM_001168407, NM_176877, NM_012301, NM_000268, NM_015576, NM_012307, NM_001795, NM_001121, NM_001127715, NM_001103184, NM_002587, NM_002205, NM_004949, NM_019106, NM_013320, NM_001166160, NM_001135805, NM_001100117, NM_001008493, NM_000109, NM_032268, NM_001130103, NM_000833, NM_130847, NM_000610, NM_001079514, NM_000335, NM_000813, NM_018489, NM_001135608, NM_000210, NM_001167580, NM_…
GO:0019898	extrinsic to membrane	41	3.90848	0.00433282	NM_003162, NM_002613, NM_020655, NM_000901, NM_001168407, NM_012301, NM_001128826, NM_000268, NM_001005743, NM_001163334, NM_012307, NM_003559, NM_001166005, NM_002077, NM_001127715, NM_017771, NM_014911, NM_019106, NM_005840, NM_001100117, NM_000963, NM_012096, NM_153366, NM_032268, NM_006572, NM_001083893, NM_001042486, NM_001039469, NM_001011703, NM_001024666, NM_003747, NM_001032221, NM_00112…
GO:0043005	neuron projection	35	3.33651	0.000265182	NM_003162, NM_001128826, NM_000267, NM_001042494, NM_015576, NM_020919, NM_005977, NM_145808, NM_005076, NM_003873, NM_003872, NM_080723, NM_020796, NM_003947, NM_001171184, NM_001166160, NM_021003, NM_001135805, NM_001145845, NM_005898, NM_000833, NM_001123066, NM_001083893, NM_000838, NM_000259, NM_004700, NM_002745, NM_000615, NM_000719, NM_005909, NM_001142885, NM_004999, NM_000875, NM_001077…
GO:0045202	synapse	33	3.14585	0.00205959	NM_003162, NM_001042599, NM_001128826, NM_012301, NM_001168407, NM_015576, NM_020919, NM_001127715, NM_019106, NM_001166160, NM_001100117, NM_001135805, NM_001008493, NM_001135699, NM_000109, NM_032268, NM_000833, NM_001042486, NM_005633, NM_000838, NM_000813, NM_021907, NM_001167580, NM_000810, NM_001024666, NM_001142699, NM_000719, NM_005909, NM_001126054, NM_003458, NM_001160328, NM_001001132,…
GO:0030424	axon	19	1.81125	0.00174093	NM_001123066, NM_001128826, NM_000267, NM_001042494, NM_000838, NM_020919, NM_002745, NM_005977, NM_145808, NM_005076, NM_000615, NM_003873, NM_003872, NM_020796, NM_005909, NM_004999, NM_001145845, NM_001077484, NM_021072
GO:0019717	synaptosome	12	1.14395	0.00480388	NM_000833, NM_019106, NM_001126054, NM_012301, NM_003458, NM_001166160, NM_015576, NM_020919, NM_001001132, NM_000663, NM_001024666, NM_002205
GO:0014069	postsynaptic density	11	1.04862	0.00381693	NM_003162, NM_000833, NM_001128826, NM_001042599, NM_005909, NM_005633, NM_000838, NM_020919, NM_001135699, NM_001142699, NM_000719
